# Supplementary material for: GlycanAnalyzer: software for automated interpretation of N-glycan profiles after exoglycosidase digestions
Source: Oxford University Press journal article supplement (doi:10.1093/bioinformatics/bty681), 2018-08-06
Supplement: bioinformatics_35_4_688_s1.xlsx [file bioinformatics_35_4_688_s1.xlsx]

## Sheet: Undigested
		UPLC peaks		Possible co-elution									3D MS1
Peak #	Observed RT (min)	% Amount (%)	Observed Glucose Units	Observed m/z	Database Glucose Units	Theoretical m/z	GlycanAnalyzer assignment	Oxford notation	Notes	Deemed correct by manual annotation		Retention time (min)	Observed mass (m/z)	Intensity (Counts)
1	4.2	0.39	4.2317	1031.4016 (+1H)	4.2653	1031.4038 (+1H)		M3		Yes		4.04	1531.77	22506
2	5.32	0.13	4.8793	1234.4708 (+1H) 615.5772 (+2H)	4.8768	1234.4832 (+1H) 617.7452 (+2H)		A1		Yes		4.05	420.957	136955
3	5.91	0.15	5.1838	1193.4532 (+1H)	5.2582	1193.4566 (+1H)		M4		Yes		4.05	422.955	79376
4	6.37	0.5	5.4002	1380.5403 (+1H)	5.3188	1380.5411 (+1H)		F(6)A1		Yes		4.05	488.945	50222
5	6.48	0.16	5.4499	1437 .56044 (+1H)	5.4097	1437.5626 (+1H)		A2		Yes		4.05	774.96	42541
6	7.65	18.85	5.9297	1583.6194 (+1H) 792.3127 (+2H)	5.8534	1583.6205 (+1H) 792.3139 (+2H)		F(6)A2	Predominant	Yes		4.05	796.941	37528
6	7.65	18.85	5.9297	1396.5378 (+1H)	5.7842	1396.5360 (+1H)		A1[3]G(4)1	Very tiny amounts - m/z peaks very low signal	Yes		4.05	556.933	37378
7	8.45	6.67	6.2156	1355.5084 (+1H)	6.1595	1355.5094 (+1H)		M5		Yes		4.05	490.941	29755
8	8.86	5.54	6.3517	1599.6118 (+1H)	6.3572	1599.6154 (+1H)		A2[3]G(4)1	Very tiny amounts - m/z peaks very low signal	Yes		4.05	1176.92	29743
8	8.86	5.54	6.3517	1542.5938 (+1H) 771.8004 (+2H)	6.3578	1542.5939 (+1H) 771.8006 (+2H)		F(6)A1[3]G(4)1	Predominant	Yes
9	9.87	37.6	6.6711	1745.6742 (+1H) 873.3401 (+2H)	6.6733	1745.6733 (+1H) 873.3403 (+2H)		F(6)A2[6]G(4)1		Yes		4.05	1200.9	27475
10	10.23	8.92	6.7807	1745.6738 (+1H) 873.3400 (+2H)	6.7934	1745.6733 (+1H) 873.3403 (+2H)		F(6)A2[3]G(4)1		Yes		4.05	558.928	26004
11	11.15	0.27	7.0552	1517.5562 (+1H)	7.0823	1517.5622 (+1H)		M6 D3		Yes		4.05	462.245	24534
12	11.36	0.81	7.1209	1761.6770 (+1H)	7.1773	1761.6682(+1H)		A2G(4)2		Yes		4.05	1197.86	22941
12	11.36	0.81	7.1209	1704.6439 (+1H) 852.8250 (+2H)	7.0347	1704.6467 (+1H) 852.8270 (+2H)		F(6)M4A1G(4)1	Predominant	Yes		4.05	1110.97	22858
13	12.62	18.07	7.5093	1907.7250 (+1H) 954.3654 (+2H)	7.54	1907.7261 (+1H) 954.3667 (+2H)		F(6)A2G(4)2		Yes		4.05	821.922	22601
14	13.8	0.37	7.8948	1679.6153 (+1H)	7.8983	1679.6150 (+1H)		M7		Yes		4.05	1218.87	21805
14	13.8	0.37	7.8948	1866.6932 (+1H) 933.8518 (+12H)	7.8533	1866.6995 (+1H) 933.8534 (+12H)		F(6)M5A1G(4)1	Predominant	Yes
15	14.85	1.1	8.2628	1100.4142 (+2H)	8.2538	1099.9144 (+2H)		F(6)A2G2S(3)1		Yes		4.05	777.961	20943
16	15.89	0.11	8.644	1842.6414 (+1H)	8.6669	1841.6678 (+1H)		M8 D2,D3		Yes		4.05	1362.81	17767
17	16.36	0.07	8.8216	Not found	8.7853	1099.9144 (+2H)		M8		Yes		4.05	1443.82	17652
18	17.24	0.31	9.1597	1245.9619 (+1H)	9.0484	1245.4621 (+2H)		F(6)A2G(4)2S(3,3)2		Yes		4.06	400.972	82270
												4.06	778.957	54911
												4.06	424.953	51933
												4.06	776.958	49624
												4.06	754.976	47821
												4.06	756.975	46513
												4.06	820.922	45984
												4.06	798.939	45944
												4.06	800.939	44493
												4.06	1196.85	41972
												4.06	752.98	40791
												4.06	822.921	40085
												4.06	734.994	37196
												4.06	732.995	37148
												4.06	818.924	35457
												4.06	730.998	32316
												4.06	624.92	29237
												4.06	1154.93	29126
												4.06	1198.93	28956
												4.06	1130.97	27773
												4.06	1132.96	27707
												4.06	802.938	26880
												4.06	1174.92	26858
												4.06	758.975	25396
												4.06	940.875	25288
												4.06	1156.93	25126
												4.06	780.957	25050
												4.06	1178.92	24545
												4.06	711.011	24370
												4.06	1112.97	24066
												4.06	824.917	24036
												4.06	1222.84	23796
												4.06	1134.96	23717
												4.06	799.942	23635
												4.06	1152.94	23527
												4.06	713.011	22163
												4.06	1455.28	21911
												4.06	938.887	21447
												4.06	1532.94	21234
												4.06	1482.78	20615
												4.06	1180.92	20254
												4.06	1622.86	19035
												4.06	1958.81	15102
												4.07	1194.82	70972
												4.07	402.972	56660
												4.07	1520.78	26324
												4.07	1155.94	24369
												4.07	1520.31	20143
												4.07	1666.76	17368
												4.08	540.912	38206
												4.08	518.933	26511
												4.08	1518.76	22093
												4.08	1412.8	17338
												4.08	1904.82	16813
												4.08	1767.77	16156
												4.17	590.218	51826
												4.19	569.237	30046
												4.19	1418.24	24341
												4.2	568.235	86654
												4.24	1214.13	23747
												4.26	639.236	24969
												4.27	1031.4	186702
												4.27	1032.41	94803
												4.27	1053.38	55954
												4.27	1054.38	35172
												4.27	1033.41	34756
												4.27	1250.15	20523
												4.28	1213.63	29777
												4.28	1192.72	21377
												4.29	598.245	48785
												4.29	1215.73	29228
												4.31	499.459	23969
												4.32	1213.12	21017
												4.33	584.23	26107
												4.34	1148.6	19104
												4.36	1251.14	24785
												4.41	530.22	36235
												4.41	1418.73	20276
												4.42	411.197	36400
												4.43	433.178	31530
												4.43	1417.72	21113
												4.43	1528.77	20603
												4.44	1605.64	32717
												4.44	1606.65	23421
												4.44	770.853	22279
												4.44	1603.67	19993
												4.44	1426.72	17090
												4.45	1604.63	44771
												4.45	1353.18	24493
												4.45	1600.7	20338
												4.46	1196.82	23928
												4.46	1199.77	22243
												4.46	1390.2	19393
												4.46	1519.77	18448
												4.46	1846.6	18065
												4.47	414.963	75766
												4.47	448.229	43888
												4.47	512.939	39178
												4.47	482.952	38157
												4.47	534.922	37039
												4.47	416.958	35301
												4.47	550.937	28387
												4.47	536.915	26092
												4.47	806.933	24686
												4.47	762.971	24010
												4.47	634.879	23655
												4.47	784.954	23164
												4.47	740.991	22665
												4.47	838.843	20967
												4.47	1454.72	18745
												4.48	441.442	27027
												4.48	1389.71	25438
												4.48	974.816	23521
												4.48	1178.76	19949
												4.48	1456.78	16178
												4.49	439.436	654869
												4.49	676.863	23609
												4.51	440.439	181800
												4.53	1218.48	25169
												4.54	1219.49	19582
												4.56	406.327	41759
												4.62	584.231	32292
												4.62	1287.66	21819
												4.63	1288.66	27040
												4.64	527.489	36722
												4.67	1249.64	41787
												4.79	1185.12	21472
												4.83	569.432	30449
												4.87	529.224	33039
												4.93	615.237	22339
												4.94	568.386	22426
												4.96	1324.67	37640
												4.99	784.775	36803
												5.01	1215.74	39480
												5.02	986.659	32805
												5.03	434.213	26346
												5.07	1324.18	28068
												5.08	1205.64	23126
												5.08	1233.64	19470
												5.09	1221.61	37506
												5.1	439.435	57255
												5.1	1420.55	25458
												5.1	1580.63	19047
												5.1	1741.48	18231
												5.11	1142.6	20560
												5.12	413.265	100417
												5.12	1224.63	19996
												5.13	587.548	60309
												5.13	553.457	47883
												5.13	852.767	42224
												5.13	1563.61	26237
												5.13	615.577	24944
												5.13	1323.69	20092
												5.14	580.804	23526
												5.14	1138.64	22102
												5.15	1393.54	29940
												5.15	1361.73	25033
												5.17	920.748	24640
												5.21	1177.46	27988
												5.25	728.275	22486
												5.33	1967.78	20868
												5.34	1234.47	40945
												5.35	1235.49	25485
												5.36	827.946	65674
												5.36	1172.93	59735
												5.36	937.982	58149
												5.36	1057.93	56277
												5.36	1287.92	49913
												5.36	707.998	48755
												5.36	1052.98	43906
												5.36	1522.86	41843
												5.36	1402.91	40376
												5.36	1637.86	38459
												5.36	822.99	37574
												5.36	1517.9	37433
												5.36	1174.92	36301
												5.36	1527.82	34560
												5.36	1167.97	32876
												5.36	1524.86	32317
												5.36	1754.85	31782
												5.36	1059.93	30500
												5.36	1294.87	29672
												5.36	1639.86	29464
												5.36	1519.9	29132
												5.36	593.004	28364
												5.36	1989.81	27778
												5.36	1877.8	27294
												5.36	1867.84	27266
												5.36	1747.89	27049
												5.36	1764.78	26696
												5.36	939.98	26653
												5.36	1984.8	26596
												5.36	1634.89	25854
												5.36	1408.87	25757
												5.36	1282.96	25085
												5.36	1523.87	24197
												5.36	1869.85	24181
												5.36	714.95	23908
												5.36	1749.88	23895
												5.36	1397.95	23895
												5.36	1512.96	23819
												5.36	943.938	23714
												5.36	1418.81	22604
												5.36	1403.92	22557
												5.36	1178.88	22151
												5.36	1986.82	21619
												5.36	1518.9	21500
												5.36	1876.79	21416
												5.36	1763.8	20849
												5.36	1760.76	20179
												5.36	1755.81	19857
												5.36	1926.86	19712
												5.36	1746.86	18905
												5.36	1988.84	17747
												5.37	942.94	96961
												5.37	947.895	95450
												5.37	712.952	81768
												5.37	717.909	63013
												5.37	832.902	58500
												5.37	1177.88	56036
												5.37	1062.89	54469
												5.37	1292.88	52785
												5.37	1407.87	49105
												5.37	949.892	46294
												5.37	597.958	45957
												5.37	944.935	42243
												5.37	1067.84	41536
												5.37	1297.83	39809
												5.37	602.915	39172
												5.37	1412.82	37673
												5.37	1179.88	33978
												5.37	1632.89	33109
												5.37	1752.84	32833
												5.37	1529.82	32478
												5.37	1289.91	32407
												5.37	1757.81	32208
												5.37	1644.81	30825
												5.37	1642.82	30695
												5.37	1417.79	30550
												5.37	1872.8	30117
												5.37	482.965	30081
												5.37	1302.79	29990
												5.37	1762.78	29583
												5.37	1647.77	29489
												5.37	1404.91	29028
												5.37	1879.72	28330
												5.37	829.943	28005
												5.37	1409.87	27976
												5.37	1184.84	27529
												5.37	1638.85	27192
												5.37	1299.83	26916
												5.37	1759.83	26683
												5.37	1758.82	26641
												5.37	1064.88	26585
												5.37	1414.83	26383
												5.37	1532.78	26312
												5.37	1890.84	25860
												5.37	1419.77	24765
												5.37	1977.87	24735
												5.37	1069.84	24492
												5.37	1874.82	24422
												5.37	1987.78	24389
												5.37	1982.83	23639
												5.37	1753.84	23596
												5.37	948.896	23073
												5.37	834.897	22834
												5.37	1993.77	22632
												5.37	1761.79	22341
												5.37	1991.77	20360
												5.37	1526.91	20108
												5.37	1997.76	19615
												5.37	1740.84	18453
												5.38	952.851	77790
												5.38	1182.84	41877
												5.38	722.864	40974
												5.38	837.857	39916
												5.38	954.85	36990
												5.38	607.87	31576
												5.38	1187.8	30559
												5.38	487.919	28204
												5.38	1072.8	25631
												5.38	1994.83	25519
												5.38	1534.78	24974
												5.38	1649.78	24446
												5.38	1881.77	24097
												5.38	1652.75	23354
												5.38	1850.86	22312
												5.38	1580.87	21666
												5.38	1884.78	19823
												5.38	1894.85	19397
												5.38	1854.84	18237
												5.39	647.457	144377
												5.39	648.461	67709
												5.39	957.806	55999
												5.39	959.805	27101
												5.39	538.535	24612
												5.39	1944.81	23819
												5.39	1767.73	23339
												5.39	1998.77	21697
												5.39	1885.83	21658
												5.4	565.565	109312
												5.4	750.404	35649
												5.4	492.877	27205
												5.41	593.597	63109
												5.41	566.57	28936
												5.41	962.763	22555
												5.42	548.503	44013
												5.42	594.6	25815
												5.43	537.535	63950
												5.44	404.818	41557
												5.44	524.767	35835
												5.44	967.718	22291
												5.45	502.787	38655
												5.45	644.716	28351
												5.45	622.734	24304
												5.5	1194.81	62881
												5.51	455.431	42300
												5.52	1195.82	48226
												5.6	1260.67	26480
												5.61	1554.63	35392
												5.61	1625.64	32297
												5.61	1810.55	29344
												5.61	1399.74	25416
												5.61	1768.58	24749
												5.61	1627.65	24579
												5.62	1398.71	37479
												5.62	1531.65	34092
												5.62	1508.67	33222
												5.62	1311.67	33018
												5.62	1110.77	31046
												5.62	1507.67	29724
												5.62	1359.69	28874
												5.62	1933.6	28434
												5.62	1579.62	26770
												5.62	1873.64	24945
												5.62	1629.65	24919
												5.62	1713.61	24268
												5.62	1971.48	21533
												5.63	1731.63	39487
												5.63	1468.66	36721
												5.63	1928.55	34612
												5.63	1401.69	33865
												5.63	1626.62	33252
												5.63	1264.66	33131
												5.63	1345.7	32129
												5.63	1270.67	30797
												5.63	1384.66	30515
												5.63	1328.68	30019
												5.63	1952.6	29997
												5.63	1996.56	29497
												5.63	1454.68	29448
												5.63	1665.58	28547
												5.63	1635.58	28343
												5.63	1833.61	28181
												5.63	1949.47	28164
												5.63	1649.67	27428
												5.63	1586.66	27372
												5.63	1937.56	27241
												5.63	1807.57	27049
												5.63	1655.63	26753
												5.63	974.817	25612
												5.63	879.815	25497
												5.63	1804.58	24834
												5.63	1556.68	24477
												5.63	1925.62	24143
												5.63	1882.58	21917
												5.63	1836.64	21284
												5.63	1994.6	20795
												5.63	1979.56	19115
												5.64	1737.55	43699
												5.64	1770.6	37546
												5.64	1318.64	37335
												5.64	1326.73	36745
												5.64	1499.66	36566
												5.64	1717.51	35458
												5.64	1959.61	35207
												5.64	1470.68	33959
												5.64	1633.62	33864
												5.64	1913.57	33258
												5.64	1651.64	32648
												5.64	1506.67	32278
												5.64	1650.64	31342
												5.64	1721.67	31055
												5.64	1679.61	30999
												5.64	1477.66	30809
												5.64	1834.54	30711
												5.64	1927.57	30327
												5.64	1601.62	29903
												5.64	1814.52	29552
												5.64	1916.6	29418
												5.64	1368.69	29128
												5.64	1612.58	28887
												5.64	1389.69	28862
												5.64	1923.59	28705
												5.64	1741.63	28628
												5.64	1335.67	28430
												5.64	1605.63	28427
												5.64	1961.59	28276
												5.64	1394.65	28047
												5.64	1382.67	27543
												5.64	1898.57	27037
												5.64	1715.61	26953
												5.64	1702.61	26664
												5.64	1685.68	26559
												5.64	916.787	26142
												5.64	1585.64	26019
												5.64	1615.65	25956
												5.64	1246.74	25113
												5.64	1698.6	25082
												5.64	938.799	24835
												5.64	1674.66	24676
												5.64	1829.66	24468
												5.64	1046.73	24398
												5.64	1523.65	22427
												5.64	1910.56	21694
												5.64	1144.79	21063
												5.65	1530.69	37960
												5.65	1510.65	37103
												5.65	1761.53	36611
												5.65	1409.65	36062
												5.65	1300.69	35477
												5.65	1461.68	35416
												5.65	1465.72	34092
												5.65	1966.51	33819
												5.65	1371.67	33782
												5.65	1383.66	33769
												5.65	1610.55	33632
												5.65	1591.67	32819
												5.65	1413.62	32275
												5.65	1630.63	32206
												5.65	1919.54	31907
												5.65	1738.64	31070
												5.65	1299.63	30962
												5.65	1269.67	30695
												5.65	1599.65	30550
												5.65	1119.74	30291
												5.65	1290.72	30156
												5.65	1628.67	30026
												5.65	1450.65	29966
												5.65	1597.63	29852
												5.65	1893.54	29833
												5.65	1373.72	29733
												5.65	1445.6	29601
												5.65	1976.57	29486
												5.65	1826.64	29455
												5.65	1558.66	29396
												5.65	914.802	29279
												5.65	1281.72	29098
												5.65	1545.62	29023
												5.65	1372.7	28981
												5.65	1527.6	28848
												5.65	1711.6	28739
												5.65	1643.64	28566
												5.65	1251.69	28346
												5.65	1458.72	28070
												5.65	1657.63	27993
												5.65	1868.6	27958
												5.65	1870.57	27950
												5.65	1794.5	27900
												5.65	1841.58	27818
												5.65	918.789	27678
												5.65	1847.61	27565
												5.65	1443.66	27475
												5.65	1572.73	27431
												5.65	1128.71	27362
												5.65	1779.53	27361
												5.65	1587.6	27085
												5.65	1391.66	27080
												5.65	1337.67	26936
												5.65	1803.58	26764
												5.65	1541.6	26711
												5.65	1547.61	26683
												5.65	1495.65	26633
												5.65	1463.74	26505
												5.65	1218.71	26198
												5.65	1878.61	26011
												5.65	1387.67	25929
												5.65	1857.57	25798
												5.65	1497.62	25474
												5.65	1789.59	25440
												5.65	1832.63	25420
												5.65	1423.69	25390
												5.65	1673.63	25206
												5.65	1459.72	24954
												5.65	1125.76	24936
												5.65	1221.7	24677
												5.65	1764.61	24603
												5.65	1603.58	23654
												5.65	1820.58	23248
												5.65	1853.57	23178
												5.65	1479.7	23092
												5.65	1478.65	22829
												5.65	1802.6	22585
												5.65	1681.63	22421
												5.65	1981.59	22336
												5.65	1145.75	22306
												5.65	1926.55	22192
												5.65	1462.68	22122
												5.65	1858.63	22075
												5.65	1808.62	21733
												5.65	1757.59	20984
												5.65	1732.62	20939
												5.65	1948.6	20779
												5.65	1594.65	18710
												5.66	1367.7	39240
												5.66	1350.65	38930
												5.66	1469.62	38556
												5.66	1166.72	37807
												5.66	1460.66	37426
												5.66	498.902	35694
												5.66	1879.59	35623
												5.66	1397.69	35547
												5.66	1946.55	34195
												5.66	1855.56	33655
												5.66	1340.68	33455
												5.66	1503.66	33239
												5.66	1653.6	33203
												5.66	1760.56	33096
												5.66	1493.67	33059
												5.66	1429.66	33054
												5.66	1339.66	32917
												5.66	702.87	32480
												5.66	1500.63	32362
												5.66	1513.64	32125
												5.66	1607.56	32098
												5.66	1660.57	32069
												5.66	1596.67	31564
												5.66	1266.7	31194
												5.66	802.791	31124
												5.66	1512.65	30919
												5.66	1944.5	30869
												5.66	1598.64	30845
												5.66	1977.59	30844
												5.66	1151.71	30468
												5.66	1504.61	30452
												5.66	1170.72	30408
												5.66	1042.77	30116
												5.66	1743.59	29905
												5.66	1920.53	29897
												5.66	1378.69	29750
												5.66	1278.75	29739
												5.66	1482.67	29720
												5.66	1621.64	29719
												5.66	1880.61	29411
												5.66	1476.69	29353
												5.66	1694.66	29261
												5.66	1440.68	29029
												5.66	1604.68	28934
												5.66	1358.66	28932
												5.66	1642.62	28809
												5.66	1725.63	28792
												5.66	1090.76	28617
												5.66	1485.64	28472
												5.66	1559.62	28350
												5.66	1566.64	28306
												5.66	1860.58	28301
												5.66	1701.63	28219
												5.66	1811.59	28007
												5.66	1136.73	27834
												5.66	1690.64	27632
												5.66	1323.68	27601
												5.66	1520.69	27363
												5.66	1435.74	27338
												5.66	866.812	27310
												5.66	1028.76	27288
												5.66	1535.65	27193
												5.66	1675.64	27046
												5.66	1292.69	26907
												5.66	1164.75	26757
												5.66	1313.67	26651
												5.66	1257.71	26611
												5.66	1859.6	26491
												5.66	1133.73	26352
												5.66	1739.58	26338
												5.66	1430.67	26195
												5.66	1244.69	26187
												5.66	1869.59	26120
												5.66	1029.78	26025
												5.66	1759.66	25984
												5.66	1929.57	25916
												5.66	1286.7	25842
												5.66	1331.7	25713
												5.66	1730.62	25673
												5.66	1945.56	25651
												5.66	1677.7	25647
												5.66	1546.69	25575
												5.66	1593.64	25304
												5.66	1861.58	25161
												5.66	1963.49	25044
												5.66	1214.7	24873
												5.66	1441.68	24861
												5.66	1267.68	24493
												5.66	1516.61	24241
												5.66	1941.67	24231
												5.66	1115.72	23963
												5.66	1623.64	23873
												5.66	1776.6	23852
												5.66	1785.58	23776
												5.66	1758.64	23761
												5.66	1876.59	23725
												5.66	1529.67	23702
												5.66	1100.73	23368
												5.66	1797.57	23300
												5.66	1301.72	23262
												5.66	1156.73	23167
												5.66	1787.52	22650
												5.66	1647.62	22587
												5.66	1606.66	22330
												5.66	1024.81	21995
												5.66	1892.62	21907
												5.66	1356.71	21778
												5.66	1806.62	21096
												5.66	1234.77	21024
												5.66	1102.75	20977
												5.66	1846.56	20466
												5.66	1982.58	17177
												5.67	1421.71	42065
												5.67	1369.69	38540
												5.67	1595.7	37735
												5.67	1532.64	37469
												5.67	1548.57	37226
												5.67	1466.6	36929
												5.67	1641.59	36674
												5.67	1712.62	35034
												5.67	1309.65	34418
												5.67	1528.61	33572
												5.67	1118.74	33560
												5.67	1617.56	33136
												5.67	1964.54	33100
												5.67	1386.64	32954
												5.67	1543.63	32565
												5.67	1304.69	32470
												5.67	906.837	32280
												5.67	1578.66	32089
												5.67	1670.62	32078
												5.67	1708.58	31722
												5.67	1377.66	31615
												5.67	1505.64	31557
												5.67	1616.69	31539
												5.67	1518.67	31366
												5.67	1638.65	31343
												5.67	1750.55	30954
												5.67	1773.55	30805
												5.67	1054.75	30674
												5.67	1492.63	30619
												5.67	1238.67	30456
												5.67	1943.53	30111
												5.67	1237.67	29796
												5.67	1491.66	29774
												5.67	1417.7	29602
												5.67	1232.71	29494
												5.67	1488.69	29399
												5.67	1273.62	29347
												5.67	1724.56	29140
												5.67	1584.64	28851
												5.67	1781.59	28458
												5.67	1936.55	28408
												5.67	1533.66	28208
												5.67	870.793	28178
												5.67	1676.63	28132
												5.67	1252.69	28042
												5.67	984.792	28041
												5.67	1600.63	27991
												5.67	1644.65	27953
												5.67	1289.66	27824
												5.67	1912.57	27812
												5.67	1404.7	27709
												5.67	1338.73	27643
												5.67	1483.63	27556
												5.67	1654.62	27535
												5.67	1801.58	27498
												5.67	1563.62	27231
												5.67	1455.64	27181
												5.67	1570.62	27136
												5.67	1511.63	27021
												5.67	1939.57	26812
												5.67	1447.69	26615
												5.67	1201.73	26249
												5.67	1410.65	26081
												5.67	1997.56	25917
												5.67	1645.6	25761
												5.67	1575.66	25671
												5.67	1784.54	25494
												5.67	1424.66	25473
												5.67	1796.6	25454
												5.67	902.82	25423
												5.67	1439.68	25363
												5.67	1392.7	25146
												5.67	1265.7	25037
												5.67	1695.61	24980
												5.67	1874.57	24715
												5.67	976.785	24704
												5.67	1407.68	24481
												5.67	1199.71	24208
												5.67	1640.66	24007
												5.67	1295.74	23397
												5.67	1275.71	23062
												5.67	612.917	22749
												5.67	1419.69	22436
												5.67	1088.81	22258
												5.67	1434.73	21869
												5.67	1147.7	21820
												5.67	538.898	21385
												5.67	1877.57	21358
												5.67	1970.47	21243
												5.67	1683.63	21148
												5.67	1934.52	21041
												5.67	1452.71	20829
												5.67	1646.65	20579
												5.67	1116.77	19277
												5.68	848.771	39367
												5.68	1751.58	38171
												5.68	878.802	37818
												5.68	1602.62	37319
												5.68	1456.63	35873
												5.68	1494.61	35327
												5.68	1489.66	33919
												5.68	1360.71	33260
												5.68	1380.64	32803
												5.68	1308.66	32442
												5.68	1567.61	32177
												5.68	1329.68	31678
												5.68	1181.72	31530
												5.68	1906.6	31501
												5.68	1792.61	31466
												5.68	1691.54	31461
												5.68	1390.65	31377
												5.68	1780.58	31374
												5.68	1464.67	31194
												5.68	1798.61	31081
												5.68	1662.62	30697
												5.68	1330.67	30293
												5.68	1374.66	30018
												5.68	1752.64	29939
												5.68	1408.67	29668
												5.68	1162.74	29613
												5.68	1129.71	29590
												5.68	1693.64	29419
												5.68	1611.59	29396
												5.68	1486.67	29313
												5.68	1609.59	28809
												5.68	1444.69	28799
												5.68	1890.6	28746
												5.68	1453.65	28633
												5.68	1347.72	28056
												5.68	1733.61	27449
												5.68	1475.75	27433
												5.68	1561.66	27378
												5.68	1008.74	27274
												5.68	1294.74	27209
												5.68	1871.59	27123
												5.68	1984.57	27064
												5.68	1248.73	26999
												5.68	1120.77	26667
												5.68	1718.7	26655
												5.68	1517.64	26272
												5.68	1062.74	26229
												5.68	1865.59	26188
												5.68	1735.53	25639
												5.68	894.795	25430
												5.68	1355.72	25423
												5.68	1416.7	25356
												5.68	1991.57	25233
												5.68	1648.65	25216
												5.68	1714.63	25147
												5.68	1157.77	24579
												5.68	936.802	24480
												5.68	1171.72	24245
												5.68	1777.63	24158
												5.68	1828.7	24012
												5.68	1899.59	23084
												5.68	1324.7	22843
												5.68	1173.69	22581
												5.68	1342.72	21709
												5.68	1990.6	21415
												5.68	1521.62	21255
												5.68	1917.54	19972
												5.68	1956.61	19889
												5.69	615.235	74452
												5.69	850.785	45289
												5.69	1322.66	38632
												5.69	1502.64	38442
												5.69	1574.64	36086
												5.69	1352.66	34692
												5.69	1689.62	34074
												5.69	1699.57	33942
												5.69	1433.7	33874
												5.69	1446.6	33413
												5.69	1364.64	32682
												5.69	1425.68	32553
												5.69	1562.56	31906
												5.69	1388.66	31861
												5.69	1569.62	31541
												5.69	1989.6	31183
												5.69	1348.68	30382
												5.69	1656.61	30332
												5.69	1747.6	29976
												5.69	1245.73	28653
												5.69	982.776	28640
												5.69	1588.64	27279
												5.69	1165.74	26942
												5.69	1571.6	26591
												5.69	1229.72	26573
												5.69	1121.73	26370
												5.69	1436.7	26179
												5.69	1534.62	25993
												5.69	1995.53	25985
												5.69	1526.64	25936
												5.69	1361.73	25648
												5.69	1107.73	24192
												5.69	1376.7	23690
												5.69	1909.59	22532
												5.69	1908.56	19855
												5.7	1363.68	37874
												5.7	1334.68	37404
												5.7	1746.57	35206
												5.7	1305.68	33957
												5.7	1457.62	33772
												5.7	1546.59	32777
												5.7	1688.57	31360
												5.7	1343.66	31147
												5.7	1366.7	30804
												5.7	1467.71	30528
												5.7	1769.59	29574
												5.7	1052.75	29525
												5.7	1351.69	29259
												5.7	1821.58	27722
												5.7	1060.74	27196
												5.7	1481.66	26837
												5.7	1152.74	25462
												5.7	1032.75	25065
												5.7	1117.74	24542
												5.7	1537.63	24538
												5.7	1515.63	24316
												5.7	1723.62	23816
												5.7	406.919	23184
												5.71	1259.64	34096
												5.71	1967.58	33276
												5.71	1555.57	32736
												5.71	1172.72	31273
												5.71	1284.68	30366
												5.71	1108.74	30215
												5.71	1538.53	29825
												5.71	1748.61	29231
												5.71	1756.64	29096
												5.71	1716.58	28051
												5.71	1827.6	27775
												5.71	1200.73	26821
												5.71	1078.73	23512
												5.71	1799.65	22612
												5.72	1375.67	38448
												5.72	1812.51	37526
												5.72	1487.61	35505
												5.72	770.854	31995
												5.72	1825.59	31368
												5.72	1302.67	30802
												5.72	1581.59	29841
												5.72	1576.6	29331
												5.72	1083.67	24299
												5.72	1983.54	21377
												5.73	1771.57	36041
												5.73	1636.64	27185
												5.73	1432.69	26396
												5.73	1333.68	21712
												5.73	1658.6	19542
												5.74	992.742	42244
												5.74	1549.61	34645
												5.75	896.772	30598
												5.75	1800.52	24808
												5.75	1297.65	24286
												5.76	1542.6	27387
												5.77	1332.63	47250
												5.78	1310.63	23145
												5.79	1312.66	29480
												5.8	1322.66	46656
												5.8	1345.69	26021
												5.81	1444.62	21970
												5.81	1554.58	20037
												5.82	1234.65	18618
												5.83	1402.59	21202
												5.83	1910.52	20050
												5.83	1652.56	17745
												5.85	876.796	54683
												5.85	1296.65	23341
												5.85	1340.6	23222
												5.85	1736.64	22430
												5.85	1971.48	20825
												5.85	1720.48	18928
												5.86	1274.59	29105
												5.86	1261.64	27811
												5.86	1367.65	27505
												5.86	1074.69	24464
												5.86	1478.56	22847
												5.86	1648.49	21183
												5.86	1247.66	20986
												5.87	852.769	42128
												5.87	1260.64	39671
												5.87	1364.59	28779
												5.87	1186.63	24407
												5.87	1900.44	23157
												5.87	1568.54	21511
												5.87	1328.68	20959
												5.87	1791.55	19729
												5.88	1030.68	31516
												5.88	1330.62	29957
												5.88	1887.53	28085
												5.88	1076.7	26645
												5.88	1336.61	23881
												5.88	1191.63	21825
												5.88	1275.63	21471
												5.88	1080.66	19806
												5.89	1304.65	30319
												5.89	856.727	26462
												5.89	1228.62	26306
												5.89	1306.66	23911
												5.89	1392.57	23144
												5.89	1180.61	23037
												5.89	1752.5	17131
												5.9	784.763	26745
												5.9	1211.62	25222
												5.9	1350.54	24325
												5.9	1546.55	24079
												5.9	1848.47	21352
												5.9	1538.52	20803
												5.9	1204.6	20017
												5.9	1172.58	19761
												5.9	1195.64	19492
												5.9	1169.63	18145
												5.91	430.913	27979
												5.91	1813.48	27711
												5.91	1410.59	26462
												5.91	1308.6	26371
												5.91	1212.59	24518
												5.91	1072.67	23141
												5.91	1271.56	22470
												5.91	1385.58	22303
												5.91	1587.46	21624
												5.91	1273.57	21288
												5.91	1662.45	19585
												5.92	1184.65	24005
												5.92	1420.54	23327
												5.92	1166.61	22911
												5.92	1612.54	21557
												5.93	1210.63	32275
												5.93	1189.61	25385
												5.93	914.719	21466
												5.93	938.686	21276
												5.93	1246.58	21151
												5.94	1142.59	26248
												5.94	1168.6	22910
												5.95	1167.59	25901
												5.95	943.64	21607
												5.96	906.259	22889
												5.96	1031.21	21697
												5.97	1193.45	65553
												5.97	1194.45	39903
												5.97	656.28	35383
												5.97	1398.53	19051
												5.98	904.686	27577
												5.99	458.406	37402
												6	1195.46	17559
												6.01	439.436	50163
												6.03	413.264	123756
												6.04	409.426	46516
												6.04	1215.76	30529
												6.05	509.404	55344
												6.05	588.549	27221
												6.06	1783.72	42921
												6.06	1766.69	30042
												6.07	1784.72	44661
												6.07	1786.72	15397
												6.08	1767.76	26729
												6.09	587.547	49412
												6.1	1785.73	30009
												6.11	716.78	30285
												6.23	439.436	50163
												6.29	484.464	98223
												6.31	483.462	320511
												6.34	612.225	35042
												6.42	1380.54	334421
												6.42	1381.54	219699
												6.42	1382.55	105174
												6.42	1402.52	79276
												6.42	1383.55	53526
												6.42	1404.53	31128
												6.42	1470.49	27360
												6.42	1674.46	17537
												6.43	1403.53	55910
												6.43	615.238	48592
												6.43	1384.54	21888
												6.44	1486.54	24548
												6.44	1487.53	21939
												6.44	1538.51	21303
												6.45	1544.47	30274
												6.45	1522.49	23705
												6.46	1471.53	19346
												6.49	1478.5	20747
												6.51	628.252	60956
												6.54	1461.55	35605
												6.56	674.261	32413
												6.57	1440.59	30376
												6.57	1595.55	24779
												6.58	1460.54	52379
												6.58	1459.54	49259
												6.59	1437.56	134011
												6.59	1438.56	98932
												6.59	1439.57	56104
												6.82	636.224	24395
												6.83	614.24	81851
												6.9	588.551	22865
												6.97	1216.74	25447
												6.97	1787.69	24747
												6.98	894.849	24775
												7.01	1472.76	15974
												7.02	1215.75	27731
												7.03	1195.82	79879
												7.03	1857.63	17004
												7.04	593.596	39712
												7.06	1194.81	82233
												7.06	758.22	46652
												7.06	1217.77	18418
												7.07	714.295	29436
												7.07	750.407	24007
												7.08	615.578	26771
												7.1	628.255	103255
												7.1	587.547	57838
												7.1	483.462	32013
												7.1	592.233	21412
												7.11	629.26	29093
												7.11	505.21	24975
												7.13	570.251	73898
												7.13	571.253	23248
												7.14	1339.52	30924
												7.14	540.239	23808
												7.16	600.26	24440
												7.23	934.698	30502
												7.27	1519.5	23359
												7.28	1222.61	25648
												7.29	1064.65	23251
												7.3	1326.52	42034
												7.3	1414.54	28623
												7.3	1388.54	27326
												7.3	1238.64	24807
												7.3	1132.61	23984
												7.3	620.825	22683
												7.31	1040.68	47702
												7.31	1612.46	45345
												7.31	830.768	35735
												7.31	1154.62	31048
												7.31	1600.47	28589
												7.31	1150.63	24449
												7.31	1300.6	24329
												7.31	1484.54	24013
												7.31	1080.64	23457
												7.32	980.68	59692
												7.32	1266.59	42474
												7.32	1714.46	27357
												7.32	1548.52	25156
												7.32	912.75	24216
												7.32	1630.42	23157
												7.33	426.878	64895
												7.33	1054.66	54924
												7.33	1340.57	46283
												7.33	1091.66	37124
												7.33	1208.62	31159
												7.33	1167.64	26694
												7.33	1000.7	24969
												7.33	1536.49	22553
												7.34	1542.53	50949
												7.34	1312.57	50223
												7.34	1598.49	40880
												7.34	1410.55	31936
												7.34	1572.5	30612
												7.34	1502.55	29679
												7.34	1276.58	29497
												7.34	412.863	28517
												7.34	1138.63	28204
												7.34	803.806	26053
												7.34	1352.56	22743
												7.35	1026.67	51995
												7.35	1412.54	51401
												7.35	556.837	50444
												7.35	1314.59	47520
												7.35	1023.68	44649
												7.35	934.773	40505
												7.35	704.794	35651
												7.35	750.782	34488
												7.35	1564.46	32647
												7.35	1010.66	29611
												7.35	1455.56	29199
												7.35	1256.6	27401
												7.35	960.721	26969
												7.35	1236.61	25212
												7.35	734.755	23350
												7.36	502.862	147496
												7.36	488.849	123453
												7.36	646.837	72130
												7.36	1570.49	61377
												7.36	1324.58	57564
												7.36	766.764	56830
												7.36	1090.68	54525
												7.36	974.744	54199
												7.36	1318.6	52468
												7.36	1270.6	52391
												7.36	1104.69	47224
												7.36	1050.72	46544
												7.36	1180.68	45757
												7.36	515.861	41804
												7.36	1338.59	41313
												7.36	924.753	38655
												7.36	584.869	35231
												7.36	1532.48	34586
												7.36	804.786	34091
												7.36	1326.59	30248
												7.36	1556.5	23722
												7.36	1503.56	20548
												7.37	399.917	172247
												7.37	413.933	85340
												7.37	632.821	80013
												7.37	1036.68	79767
												7.37	1022.69	69530
												7.37	618.806	63300
												7.37	543.892	56379
												7.37	1234.64	56236
												7.37	892.731	55716
												7.37	776.793	54225
												7.37	700.809	53779
												7.37	1354.58	53273
												7.37	1156.63	50568
												7.37	474.834	47723
												7.37	878.708	45753
												7.37	1152.65	45336
												7.37	748.766	43478
												7.37	752.739	41943
												7.37	1350.58	41780
												7.37	894.717	39427
												7.37	1093.66	35419
												7.37	1436.54	34778
												7.37	659.833	33725
												7.37	1810.4	33342
												7.37	517.888	33215
												7.37	1251.61	31952
												7.37	1106.65	30900
												7.37	816.752	30664
												7.37	604.789	28476
												7.37	1194.61	28427
												7.37	789.785	28267
												7.37	1283.61	27595
												7.37	1528.5	26181
												7.37	946.711	25021
												7.37	1025.68	24763
												7.37	427.948	24606
												7.37	687.868	23721
												7.38	529.876	73498
												7.38	906.745	70243
												7.38	516.879	68632
												7.38	762.779	62390
												7.38	1008.68	60828
												7.38	1062.67	60336
												7.38	1166.65	53320
												7.38	1494.53	53271
												7.38	1296.63	51074
												7.38	1286.6	50838
												7.38	1468.53	50132
												7.38	780.779	48473
												7.38	992.716	41974
												7.38	650.83	38294
												7.38	660.855	38292
												7.38	673.848	36455
												7.38	1454.56	36374
												7.38	794.79	33181
												7.38	1306.59	31843
												7.38	530.893	31044
												7.38	506.857	29922
												7.38	647.846	26922
												7.38	1144.64	25833
												7.38	557.908	24989
												7.38	1561.48	24289
												7.38	400.923	21145
												7.39	1078.63	59180
												7.39	1364.57	58055
												7.39	1282.59	57463
												7.39	1028.7	56030
												7.39	910.749	50255
												7.39	1126.64	50067
												7.39	636.809	42597
												7.39	1248.6	38529
												7.39	622.791	33031
												7.39	1064.75	30991
												7.39	492.837	30262
												7.39	633.828	28697
												7.39	1107.64	27841
												7.39	1220.66	25192
												7.39	664.847	24469
												7.4	994.669	61095
												7.4	920.768	60558
												7.4	1254.6	52526
												7.4	1356.59	44952
												7.4	714.825	41726
												7.4	790.805	41124
												7.4	1482.55	38104
												7.4	1077.68	32773
												7.4	520.872	31837
												7.4	1426.55	30601
												7.4	1471.54	29109
												7.4	817.818	25285
												7.41	1014.69	60146
												7.41	1310.59	56320
												7.41	844.786	49533
												7.41	1756.44	32756
												7.41	489.857	29903
												7.41	647.457	28429
												7.41	1510.5	24808
												7.41	663.818	23818
												7.41	1302.6	23550
												7.42	1386.53	44376
												7.42	1496.54	44166
												7.42	1618.49	30670
												7.42	947.701	29429
												7.42	1353.55	26655
												7.42	1485.48	26312
												7.42	1567.57	24555
												7.42	649.809	23879
												7.43	1565.61	50191
												7.43	1209.61	41985
												7.43	1566.62	38695
												7.43	1242.61	32729
												7.43	1260.59	30845
												7.43	1560.49	28439
												7.44	1092.66	62693
												7.44	802.736	47413
												7.44	1486.54	46892
												7.44	996.68	31004
												7.44	1408.56	30374
												7.45	503.871	45473
												7.45	1287.57	43727
												7.45	1514.51	41509
												7.45	1290.58	35385
												7.45	848.755	34323
												7.45	1342.54	30747
												7.45	1100.63	29778
												7.45	1562.5	28642
												7.45	736.773	24307
												7.46	1257.59	30626
												7.47	1158.63	50851
												7.47	1024.7	46006
												7.47	1508.52	35821
												7.47	1332.56	30948
												7.47	1210.61	28813
												7.48	686.795	48350
												7.48	1372.55	38635
												7.48	606.821	35452
												7.48	1128.63	33282
												7.48	1394.56	31552
												7.48	1440.53	31414
												7.48	1434.54	31314
												7.48	884.733	29497
												7.48	1097.63	29313
												7.48	1292.58	27369
												7.48	1300.59	26037
												7.48	1446.56	24642
												7.49	570.852	48770
												7.49	1280.57	46339
												7.49	1632.48	36451
												7.49	1172.64	35391
												7.49	1202.61	34530
												7.49	1225.63	33132
												7.49	1122.62	31256
												7.49	1483.5	30692
												7.49	1306.59	30459
												7.49	1143.62	28125
												7.49	1592.45	26806
												7.49	1524.51	26704
												7.49	754.781	25555
												7.49	836.697	21905
												7.5	850.755	52203
												7.5	1146.61	38680
												7.5	1478.55	34970
												7.5	1348.59	32123
												7.5	1400.53	30321
												7.5	1142.61	29662
												7.5	870.728	28927
												7.5	1129.67	28352
												7.5	918.694	27112
												7.5	1328.57	26678
												7.5	982.67	26581
												7.5	988.692	26490
												7.5	1156.63	26047
												7.5	1086.66	25874
												7.5	1370.54	25098
												7.5	1279.59	24747
												7.5	1448.53	23373
												7.51	920.709	69191
												7.51	904.689	38285
												7.51	1410.5	35695
												7.51	440.893	34768
												7.51	1330.54	32723
												7.51	1110.66	31430
												7.51	1098.65	31247
												7.51	1484.49	30432
												7.51	1116.68	30010
												7.51	1416.53	29984
												7.51	1194.61	27536
												7.51	1155.61	26996
												7.51	1096.65	26768
												7.51	1362.55	25749
												7.51	1232.59	25689
												7.51	1346.56	25367
												7.51	1444.56	24395
												7.51	834.756	22483
												7.52	1404.55	50219
												7.52	1228.61	40660
												7.52	1344.56	35884
												7.52	1246.58	32704
												7.52	1124.63	30633
												7.52	1322.58	29268
												7.52	1366.58	28500
												7.52	1466.54	27397
												7.52	1130.62	27315
												7.52	1216.57	26966
												7.52	1320.56	26834
												7.52	800.767	25774
												7.52	1748.48	25353
												7.53	1708.49	47390
												7.53	1164.63	40937
												7.53	1662.47	37637
												7.53	790.74	36062
												7.53	1430.56	32446
												7.53	1082.66	32130
												7.53	1638.42	32034
												7.53	1497.5	29899
												7.53	1198.63	29168
												7.53	1376.55	28948
												7.53	1064.65	28838
												7.53	1401.55	28697
												7.53	1576.5	28576
												7.53	1472.47	27396
												7.53	1554.48	26965
												7.53	1278.61	26884
												7.53	1371.54	26810
												7.53	1178.62	26770
												7.53	1176.64	24114
												7.53	1360.53	22856
												7.54	1728.42	42085
												7.54	1174.63	35690
												7.54	1424.5	32540
												7.54	1048.68	31945
												7.54	1160.63	31845
												7.54	856.726	30577
												7.54	1368.59	30453
												7.54	1038.71	28644
												7.54	1168.62	28534
												7.54	1842.45	27176
												7.54	1652.45	27080
												7.54	1294.54	27053
												7.54	786.768	25677
												7.54	1293.59	25505
												7.54	1624.48	25416
												7.54	1622.47	25359
												7.55	1050.63	49236
												7.55	1070.66	43133
												7.55	898.746	36396
												7.55	1302.59	35002
												7.55	1436.54	34437
												7.55	1250.6	34323
												7.55	1593.46	34218
												7.55	1764.46	34137
												7.55	1442.54	32622
												7.55	1192.63	32280
												7.55	1088.68	31815
												7.55	1563.48	31598
												7.55	644.252	30935
												7.55	1094.64	30538
												7.55	1060.62	30352
												7.55	1066.69	29733
												7.55	1474.52	27103
												7.55	1534.52	26355
												7.55	638.841	25032
												7.55	1776.42	24763
												7.55	1518.47	23900
												7.55	1180.62	23542
												7.55	858.728	22255
												7.56	426.877	50334
												7.56	986.667	45539
												7.56	1186.63	41547
												7.56	1480.53	35762
												7.56	1200.61	35286
												7.56	1120.64	34660
												7.56	1188.63	32154
												7.56	1214.61	30898
												7.56	1465.52	30190
												7.56	1134.63	29754
												7.56	1118.64	29490
												7.56	1132.64	28901
												7.56	1612.46	28295
												7.56	660.786	28206
												7.56	1559.51	28029
												7.56	1056.65	27466
												7.56	480.847	27428
												7.56	984.682	26189
												7.56	1450.56	25124
												7.57	476.862	42769
												7.57	1876.38	35037
												7.57	1262.61	33510
												7.57	1420.53	33010
												7.57	1212.63	29439
												7.57	1458.52	29074
												7.57	1476.52	27810
												7.57	1902.33	27023
												7.57	462.846	25958
												7.58	1538.55	43120
												7.58	1012.68	36338
												7.58	952.721	35623
												7.58	1224.6	34262
												7.58	1162.64	32573
												7.58	1258.61	29801
												7.58	1709.51	27030
												7.59	544.848	22290
												7.6	1002.7	41771
												7.6	960.721	36736
												7.6	1422.55	34221
												7.6	1182.61	33059
												7.6	1551.49	31328
												7.6	1004.69	27344
												7.61	1398.54	66129
												7.61	1514.51	47392
												7.61	1601.49	27971
												7.61	494.869	23866
												7.61	1501.99	20353
												7.62	1396.54	122214
												7.62	1397.54	88277
												7.62	1399.56	45886
												7.62	508.883	41337
												7.62	854.762	37811
												7.62	1918.4	22511
												7.63	1481.51	32568
												7.63	1580.48	27128
												7.63	1046.67	26039
												7.63	1386.07	19132
												7.64	1128.66	58669
												7.64	1509.55	29756
												7.64	1787.91	19872
												7.65	1418.55	40230
												7.65	890.749	37800
												7.65	530.833	20272
												7.66	690.774	49571
												7.66	864.753	49047
												7.66	1760.49	32683
												7.66	1444.03	27262
												7.66	998.696	26940
												7.66	1336.07	26593
												7.66	1017.7	23516
												7.66	1430.05	20335
												7.67	1256.58	35185
												7.67	840.754	32237
												7.67	967.718	30036
												7.67	1933.92	24628
												7.67	1892.86	24283
												7.67	1775.03	21126
												7.68	813.783	28262
												7.68	1423.57	27335
												7.68	1127.65	25434
												7.68	1078.18	24093
												7.68	1527.55	22241
												7.68	1582.98	21014
												7.68	1591.96	20164
												7.69	811.788	462774
												7.69	830.76	111791
												7.69	872.742	55518
												7.69	853.763	44946
												7.69	895.238	42942
												7.69	940.717	42149
												7.69	895.742	40436
												7.69	1056.71	39517
												7.69	1765.48	39427
												7.69	872.237	32760
												7.69	1415.55	31121
												7.69	1640.5	28272
												7.69	1846.88	27904
												7.69	1409.57	26642
												7.69	794.824	25542
												7.69	1724.49	24894
												7.69	1385.55	23837
												7.69	1214.13	23587
												7.69	1394.06	22590
												7.69	1577.51	22546
												7.69	1061.17	22517
												7.69	1506	20032
												7.7	811.287	621299
												7.7	812.289	227398
												7.7	830.259	120573
												7.7	812.789	101906
												7.7	831.263	49779
												7.7	813.287	45486
												7.7	1764.48	42739
												7.7	853.265	38010
												7.7	906.243	37078
												7.7	832.252	36083
												7.7	593.596	35745
												7.7	1949.42	32614
												7.7	1439.56	31811
												7.7	1639.5	29545
												7.7	929.726	28880
												7.7	1986.4	28804
												7.7	1664.5	25534
												7.7	1167.14	24254
												7.7	990.692	23026
												7.7	1255.14	22820
												7.7	1957.88	21723
												7.7	1906.82	18580
												7.71	1583.62	9584669
												7.71	1584.62	7114691
												7.71	1585.62	3453152
												7.71	1586.63	1266800
												7.71	792.313	1148896
												7.71	792.814	868830
												7.71	793.316	419030
												7.71	1587.63	380214
												7.71	1667.57	329941
												7.71	1380.54	283051
												7.71	1381.54	199519
												7.71	793.817	155408
												7.71	1669.57	134771
												7.71	1218.49	119209
												7.71	1382.55	114725
												7.71	1588.63	109179
												7.71	1603.59	66717
												7.71	1219.49	65888
												7.71	1602.59	56404
												7.71	794.318	46755
												7.71	1383.56	46715
												7.71	1096.4	45150
												7.71	822.768	43858
												7.71	1881.46	42395
												7.71	1811.52	39830
												7.71	948.713	39659
												7.71	1871.45	38338
												7.71	1895.49	36454
												7.71	1830.46	35454
												7.71	1842.49	35211
												7.71	1652.57	34872
												7.71	1876.47	34733
												7.71	1957.49	34504
												7.71	1874.48	34467
												7.71	1920.44	33984
												7.71	1967.44	33938
												7.71	1641.56	33567
												7.71	1501.58	33468
												7.71	1898.39	31969
												7.71	1579.52	30810
												7.71	1699.49	30618
												7.71	1598.59	30465
												7.71	831.759	30423
												7.71	1999.47	29728
												7.71	1973.42	29463
												7.71	814.295	29451
												7.71	1703.5	29146
												7.71	1998.42	29129
												7.71	1808.5	28736
												7.71	1939.9	28478
												7.71	1816.42	28207
												7.71	1755.53	27235
												7.71	1097.4	27158
												7.71	1715.49	26706
												7.71	1900.51	26274
												7.71	1975.44	25954
												7.71	903.73	25820
												7.71	1734.47	24859
												7.71	937.719	24577
												7.71	1037.18	24550
												7.71	1974.86	24292
												7.71	864.255	24103
												7.71	1769.96	24039
												7.71	994.213	23801
												7.71	1121.15	23409
												7.71	1369.09	23317
												7.71	1232.1	22858
												7.71	1173.15	22345
												7.71	1208.12	21716
												7.71	1476.04	21309
												7.71	1973.86	20256
												7.71	1873	19751
												7.71	1315.1	19617
												7.72	1668.57	257646
												7.72	1584.12	177576
												7.72	1585.12	101639
												7.72	803.303	96074
												7.72	1751.53	82613
												7.72	803.804	79314
												7.72	1752.52	78715
												7.72	1670.57	74620
												7.72	1603.1	70953
												7.72	1682.58	60305
												7.72	1683.55	59862
												7.72	1671.57	53116
												7.72	1797.51	51378
												7.72	1705.53	51180
												7.72	1798.55	50742
												7.72	1582.57	47859
												7.72	1771.52	47421
												7.72	537.533	45938
												7.72	1604.1	45934
												7.72	483.462	44324
												7.72	1841.47	42980
												7.72	1437.56	42696
												7.72	1772.53	42623
												7.72	1835.48	41703
												7.72	1799.53	40782
												7.72	1220.48	40175
												7.72	1882.45	39950
												7.72	1657.56	39685
												7.72	1589.63	39632
												7.72	1963.43	38229
												7.72	1824.44	37374
												7.72	1604.58	37353
												7.72	1899.43	36977
												7.72	1773.52	36351
												7.72	1897.47	36154
												7.72	1710.52	34954
												7.72	1902.53	34617
												7.72	1817.48	34614
												7.72	814.789	32673
												7.72	1586.14	32130
												7.72	1885.51	32060
												7.72	1969.47	31364
												7.72	1563.56	31356
												7.72	1880.53	31285
												7.72	1827.52	31191
												7.72	1911.44	30757
												7.72	1614.53	30741
												7.72	1637.58	30528
												7.72	1942.43	30394
												7.72	1928.45	29862
												7.72	804.802	29346
												7.72	566.569	28787
												7.72	1886.39	28670
												7.72	1914.47	28668
												7.72	1593.47	28346
												7.72	1761.52	28084
												7.72	1864.42	28076
												7.72	1384.55	28041
												7.72	822.275	27747
												7.72	1789.51	27480
												7.72	1845.43	27301
												7.72	1920.93	26745
												7.72	1194.11	26098
												7.72	1947.43	25795
												7.72	1217.09	25560
												7.72	1692.48	25512
												7.72	1896.48	25387
												7.72	1832.87	24514
												7.72	1985.39	23835
												7.72	1138.17	23559
												7.72	1948.45	23522
												7.72	1778.45	23505
												7.72	1624.57	23004
												7.72	1136.15	22639
												7.72	879.244	22246
												7.72	1732.02	22026
												7.72	1907.9	21880
												7.72	1234.48	21699
												7.72	1133.16	21531
												7.72	1510.07	21158
												7.72	1406.06	20899
												7.72	1205.12	19296
												7.72	1926.84	18398
												7.72	1895.03	17499
												7.73	1606.6	274400
												7.73	565.565	72414
												7.73	1681.58	66677
												7.73	1684.56	59689
												7.73	1753.52	53479
												7.73	1737.54	52605
												7.73	1804.51	45497
												7.73	1901.48	44970
												7.73	1739.51	44401
												7.73	1595.61	44178
												7.73	1642.51	43579
												7.73	1855.47	42647
												7.73	804.306	42526
												7.73	1621.54	42009
												7.73	1594.59	41907
												7.73	1722.52	41395
												7.73	1903.42	41284
												7.73	1706.53	40836
												7.73	1595.11	40743
												7.73	1609.62	40480
												7.73	1754.52	38914
												7.73	1747.53	38590
												7.73	1815.47	38152
												7.73	1774.53	37883
												7.73	1858.44	37708
												7.73	1892.44	37600
												7.73	1743.52	37476
												7.73	1745.55	37474
												7.73	1814.52	36759
												7.73	1438.56	35964
												7.73	1769.52	35188
												7.73	1727.54	35156
												7.73	1848.5	35144
												7.73	1687.51	35066
												7.73	1781.48	34533
												7.73	1950.47	34319
												7.73	1759.52	34290
												7.73	1636.57	33965
												7.73	1870.48	33889
												7.73	879.747	33871
												7.73	1960.45	33745
												7.73	1929.41	33710
												7.73	1723.56	33543
												7.73	1846.49	33477
												7.73	1740.48	33213
												7.73	1766.51	33161
												7.73	1707.53	33128
												7.73	1659.51	32986
												7.73	1984.44	32359
												7.73	1921.47	32249
												7.73	1770.49	32135
												7.73	1708.54	31930
												7.73	1812.46	31537
												7.73	1983.49	31518
												7.73	1993.39	31174
												7.73	1860.49	30929
												7.73	1661.49	30776
												7.73	1644.57	30663
												7.73	1623.55	30640
												7.73	1790.49	30634
												7.73	1704.54	30474
												7.73	1731.55	30456
												7.73	1693.49	30001
												7.73	1979.47	29254
												7.73	1596.1	29176
												7.73	1971.46	29060
												7.73	1935.45	28915
												7.73	1844.48	28690
												7.73	1956.45	28355
												7.73	1918.51	28278
												7.73	1832.44	28143
												7.73	1982.46	28092
												7.73	1532.54	28027
												7.73	1776.52	27857
												7.73	1941.47	27778
												7.73	1732.52	27752
												7.73	1917.45	27697
												7.73	1884.47	27383
												7.73	1786.49	27189
												7.73	1869.45	27177
												7.73	1785.53	27156
												7.73	1611.53	26966
												7.73	1638.53	26834
												7.73	1849.47	26792
												7.73	1927.47	26779
												7.73	1744.48	26461
												7.73	1834.49	26452
												7.73	1679.47	26281
												7.73	1628.69	25982
												7.73	1122.16	25729
												7.73	1916.46	25589
												7.73	1718.5	25487
												7.73	1653.46	25220
												7.73	1863.48	24891
												7.73	1997.49	24406
												7.73	1225.12	24163
												7.73	1698.5	23531
												7.73	1629.69	23405
												7.73	1862.51	23286
												7.73	1994.5	23159
												7.73	1672.09	23126
												7.73	1356.08	23104
												7.73	1127.14	22880
												7.73	1090.17	22838
												7.73	1188.13	22750
												7.73	1549	22554
												7.73	1351.09	22310
												7.73	1791.95	21992
												7.73	1443.07	21635
												7.73	1367.06	21612
												7.73	1770.95	21331
												7.73	1327.08	20101
												7.73	1471.04	20032
												7.73	1984.86	19850
												7.73	1628.46	19207
												7.73	1297.1	19174
												7.73	1646.12	18713
												7.73	1622.99	18707
												7.73	1800.92	17349
												7.74	1605.6	371232
												7.74	1607.6	154738
												7.74	1735.54	94598
												7.74	1736.56	82238
												7.74	1608.6	70662
												7.74	413.265	60765
												7.74	1819.51	51665
												7.74	1767.51	49636
												7.74	1803.52	47856
												7.74	1685.57	46543
												7.74	1720.54	45882
												7.74	1865.47	45590
												7.74	1721.53	43278
												7.74	1673.58	43271
												7.74	1719.53	43063
												7.74	1805.51	42496
												7.74	1836.5	42490
												7.74	1908.4	40965
												7.74	1726.49	40013
												7.74	1888.53	38963
												7.74	1662.48	38621
												7.74	1672.49	38562
												7.74	505.21	38262
												7.74	1867.52	38009
												7.74	1645.56	37657
												7.74	1821.51	37632
												7.74	1686.56	36161
												7.74	1749.53	35827
												7.74	1794.54	35407
												7.74	1887.46	34761
												7.74	1968.49	34378
												7.74	1940.46	34343
												7.74	1953.45	34276
												7.74	1890.53	33828
												7.74	1750.52	33761
												7.74	1925.5	33655
												7.74	1923.45	33645
												7.74	1660.51	33584
												7.74	1851.51	33473
												7.74	1756.54	33128
												7.74	1711.54	33113
												7.74	1792.47	32468
												7.74	1632.54	32182
												7.74	1658.55	32069
												7.74	1796.49	32043
												7.74	1907.48	31880
												7.74	1826.5	31683
												7.74	1695.52	31648
												7.74	1728.54	31337
												7.74	1813.52	31121
												7.74	1852.48	31100
												7.74	1795.5	30506
												7.74	1810.48	30445
												7.74	1955.46	30429
												7.74	1996.42	30392
												7.74	1962.44	30355
												7.74	1951.46	30305
												7.74	1829.49	30159
												7.74	1596.62	29888
												7.74	1663.55	29738
												7.74	1825.51	29429
												7.74	1806.52	29284
												7.74	1791.5	29273
												7.74	1952.42	29269
												7.74	1823.51	29187
												7.74	1689.56	29017
												7.74	1677.51	28942
												7.74	1990.36	28852
												7.74	1861.47	28851
												7.74	1919.49	28493
												7.74	1643.56	28406
												7.74	1733.49	28220
												7.74	1777.51	27979
												7.74	1964.43	27936
												7.74	1878.43	27877
												7.74	1822.52	27711
												7.74	1838.5	27684
												7.74	1661.94	27679
												7.74	1762.55	27603
												7.74	1946.47	27530
												7.74	1859.53	27481
												7.74	1391.56	27337
												7.74	1801.48	27288
												7.74	1649.52	27172
												7.74	1868.47	27054
												7.74	1787.52	26996
												7.74	1688.59	26886
												7.74	1954.42	26783
												7.74	1847.55	26692
												7.74	1634.51	26174
												7.74	1606.14	25948
												7.74	1933.42	25876
												7.74	1970.47	25802
												7.74	1675.56	25746
												7.74	1763.51	25687
												7.74	1912.45	25446
												7.74	1651.57	25306
												7.74	1904.05	25259
												7.74	1664.57	25176
												7.74	1961.42	24357
												7.74	1638.11	24221
												7.74	1712.55	24159
												7.74	1824.92	23974
												7.74	1637.09	23449
												7.74	1966.45	23135
												7.74	1259.14	22726
												7.74	1831.5	22501
												7.74	1780.53	22472
												7.74	1191.14	22059
												7.74	1654.53	21964
												7.74	1237.1	21957
												7.74	1698.01	21917
												7.74	1451.03	21914
												7.74	1316.06	21556
												7.74	1988.4	21136
												7.74	1828.51	18938
												7.74	1762.93	16863
												7.74	1715.95	15697
												7.74	1850.12	15375
												7.74	1858.93	14913
												7.75	578.216	100170
												7.75	1820.49	47409
												7.75	1622.55	45129
												7.75	1738.56	44507
												7.75	1741.55	44341
												7.75	1725.53	43431
												7.75	1581.61	42648
												7.75	1768.52	41257
												7.75	1872.47	39809
												7.75	1873.45	39137
												7.75	1833.46	38865
												7.75	1856.48	38653
												7.75	1840.5	38322
												7.75	1854.54	36214
												7.75	1904.45	36086
												7.75	1866.48	35557
												7.75	1839.49	34966
												7.75	1843.53	34089
												7.75	1837.53	33808
												7.75	1809.49	33037
												7.75	1945.42	32926
												7.75	1965.5	32729
												7.75	1788.48	32074
												7.75	1932.48	31762
												7.75	1597.57	31682
												7.75	1922.53	31491
												7.75	1497.55	31085
												7.75	1853.48	30903
												7.75	1783.53	30877
												7.75	1926.46	29940
												7.75	1610.61	29917
												7.75	1913.44	29433
												7.75	1924.48	29112
												7.75	1633.48	28544
												7.75	1701.59	28538
												7.75	1939.48	27532
												7.75	1936.46	27416
												7.75	1894.48	26940
												7.75	1937.44	26887
												7.75	1696.59	26100
												7.75	1645.12	26054
												7.75	1991.44	25377
												7.75	1972.49	25200
												7.75	1802.46	25048
												7.75	1323.09	24150
												7.75	1930.46	23738
												7.75	1106.16	23019
												7.75	1806.94	22479
												7.75	1995.5	22335
												7.75	1782.02	21631
												7.75	1987.42	21581
												7.75	1687.95	21045
												7.75	1416.04	21014
												7.75	1958.85	20804
												7.75	1976.81	20756
												7.75	1491.03	20354
												7.76	1857.52	42880
												7.76	1742.53	39333
												7.76	1674.57	38006
												7.76	587.546	37371
												7.76	1800.53	34552
												7.76	1680.53	34120
												7.76	1760.57	33030
												7.76	1877.44	30378
												7.76	1889.53	29697
												7.76	1691.57	29645
												7.76	1879.51	28724
												7.76	1665.5	26760
												7.76	1974.37	26415
												7.76	1944.47	26283
												7.76	1723	26218
[truncated: 5,959 more rows]

## Sheet: ABS
		UPLC peaks														3D MS1
Peak #	Observed RT (min)	% Amount (%)	Observed Glucose Units	Observed m/z	Database Glucose Units	Theoretical m/z	GlycanAnalyzer assignment	Oxford notation	Notes						Retention time (min)	Observed mass (m/z)	Intensity (Counts)
1	4.24	0.74	4.2522	1031.4010 (+1H)	4.2653	1031.4038 (+1H)		M3							4.05	527.158	27984
2	6.39	0.46	5.4114	1380.5466 (+1H)	5.3188	1380.5411 (+1H)		F(6)A1							4.08	420.957	42822
3	6.55	0.48	5.4838	1437.5624 (+1H)	5.4097	1437.5626 (+1H)		A2							4.08	422.955	25821
4	7.68	20.64	5.9413	1583.6176 (+1H) 792.3120(+2H)	5.8534	1583.6205 (+1H) 792.3139 (+2H)		F(6)A2	co eluting						4.08	400.973	24469
4	7.68	20.64	5.9413	1396.5252 (+1H)	5.7842	1396.5360 (+1H)		A1[3]G(4)1	co eluting
5	8.48	9.74	6.2254	1355.5099 (+1H)	6.1595	1355.5094 (+1H)		M5							4.08	424.954	17265
6	8.89	6.82	6.3617	1600.615 (+1H)	6.3572	1599.6154 (+1H)		A2[3]G(4)1	co eluting						4.08	402.972	17055
6	8.89	6.82	6.3617	1542.5924 (+1H) 771.8000(+2H)	6.3578	1542.5939 (+1H) 771.8006 (+2H)		F(6)A1[3]G(4)1	co eluting
7	9.9	35.66	6.6803	1745.673 (+1H) 873.340 (+2H)	6.6733	1745.6733 (+1H) 873.3403 (+2H)		F(6)A2[6]G(4)1							4.28	569.432	36619
8	10.27	8.63	6.7906	1745.6728 (+1H) 873.3403 (+2H)	6.7934	1745.6733 (+1H) 873.3403 (+2H)		F(6)A2[3]G(4)1							4.3	1031.4	34380
9	11.16	0.49	7.0598	1768.656 (+1H) 884.328 (+2H)	7.1773	1761.668 (+1H) 881.338 (+2H)		A2G(4)2	Co-eluting
9	11.16	0.49	7.0598	1704.638 (+1H)	7.0347	1704.6467 (+1H) 852.8270 (+2H)		F(6)M4A1G(4)1	co eluting						4.3	1032.41	18369
10	12.65	16.34	7.5188	1907.725 (+1H) 954.365 (+2H)	7.54	1907.7261 (+1H) 954.367 (+2H)		F(6)A2G(4)2							4.3	1053.38	16950
															4.49	414.963	30819
															4.49	416.959	15940
															4.49	482.952	10616
															4.49	550.941	10379
															5.26	559.518	28629
															5.26	1216.75	14810
															5.27	1215.75	33947
															5.27	553.46	22395
															5.27	615.58	16665
															5.32	575.515	13632
															5.32	426.801	12071
															5.32	562.72	8471
															5.32	584.703	7711
															5.32	704.654	7393
															5.32	688.685	7037
															5.32	568.729	6417
															5.33	404.82	34366
															5.33	644.719	22630
															5.33	742.688	16168
															5.33	540.738	13646
															5.33	884.61	13032
															5.33	518.756	12926
															5.33	666.7	12280
															5.33	546.751	12060
															5.33	982.592	11469
															5.33	660.689	11259
															5.33	758.648	9871
															5.33	1004.57	8936
															5.33	786.651	8835
															5.33	1244.48	7020
															5.33	1124.51	6959
															5.34	1194.82	45299
															5.34	524.771	34218
															5.34	502.787	29177
															5.34	622.738	18550
															5.34	764.668	18216
															5.34	972.677	11956
															5.34	617.785	10162
															5.34	977.631	7628
															5.35	537.535	54174
															5.35	1195.82	34715
															5.35	967.717	16796
															5.36	548.504	65271
															5.36	549.508	39089
															5.36	497.832	22256
															5.36	732.776	13686
															5.36	612.828	10808
															5.37	647.46	133345
															5.37	648.462	49999
															5.37	1777.62	13463
															5.38	607.871	24201
															5.38	959.806	22731
															5.38	1292.88	17771
															5.38	1654.73	15881
															5.38	1074.8	15525
															5.38	1419.79	14645
															5.38	1057.94	14548
															5.38	1762.76	14438
															5.38	1529.81	14063
															5.38	1769.71	14032
															5.38	1407.87	13924
															5.38	1069.84	12598
															5.38	1642.81	12115
															5.38	1172.93	11723
															5.38	1068.84	11688
															5.38	1882.72	11482
															5.38	937.987	11477
															5.38	1884.74	11291
															5.38	948.892	11114
															5.38	1896.72	11085
															5.38	1644.82	11063
															5.38	1409.87	11047
															5.38	944.938	10854
															5.38	1294.87	10720
															5.38	1533.76	10469
															5.38	1904.69	10441
															5.38	1889.73	10262
															5.38	1759.81	10241
															5.38	1752.85	10230
															5.38	1524.88	9870
															5.38	1528.84	9746
															5.38	1298.81	9746
															5.38	1877.75	9487
															5.38	1174.93	9273
															5.38	1637.86	9249
															5.38	1413.86	8920
															5.38	714.951	8241
															5.39	565.567	95992
															5.39	952.852	55348
															5.39	947.899	45665
															5.39	722.865	32920
															5.39	717.911	32750
															5.39	832.904	31760
															5.39	1192.75	28978
															5.39	942.942	27850
															5.39	1067.84	27019
															5.39	837.86	26629
															5.39	1187.8	26231
															5.39	1182.84	24930
															5.39	712.956	24246
															5.39	1072.8	24169
															5.39	954.848	24081
															5.39	1297.84	23106
															5.39	1302.79	22880
															5.39	842.815	22166
															5.39	1077.76	21765
															5.39	602.918	21395
															5.39	1062.89	21301
															5.39	1177.88	20990
															5.39	1307.75	20899
															5.39	827.949	19578
															5.39	1417.79	19252
															5.39	1422.77	18670
															5.39	949.89	18532
															5.39	1532.79	18101
															5.39	1412.83	17875
															5.39	1537.72	17638
															5.39	1527.81	16853
															5.39	1184.83	16308
															5.39	1304.79	15783
															5.39	597.962	15514
															5.39	1542.7	15019
															5.39	1772.71	14638
															5.39	1657.7	14582
															5.39	1652.73	14565
															5.39	834.898	14395
															5.39	1647.78	14345
															5.39	1414.82	13575
															5.39	953.853	13140
															5.39	951.786	12927
															5.39	1299.83	12898
															5.39	1534.78	12829
															5.39	1659.68	12743
															5.39	1767.73	12615
															5.39	1539.73	12563
															5.39	1757.81	12549
															5.39	1764.75	12336
															5.39	482.968	12325
															5.39	1649.77	12310
															5.39	1774.67	12204
															5.39	1887.66	11973
															5.39	1179.88	11899
															5.39	839.855	11546
															5.39	1064.88	11416
															5.39	1522.87	10879
															5.39	1303.77	10677
															5.39	1287.93	10415
															5.39	829.951	9928
															5.39	719.905	9300
															5.39	707.996	9143
															5.39	1648.79	9096
															5.39	1402.93	8887
															5.39	1059.94	7426
															5.39	822.995	7379
															5.39	1655.73	6962
															5.39	1293.87	6858
															5.4	957.808	52542
															5.4	727.823	27364
															5.4	1312.7	20680
															5.4	487.921	18796
															5.4	1427.7	16979
															5.4	1189.8	16594
															5.4	1309.75	15553
															5.4	1424.74	15023
															5.4	844.816	12592
															5.41	962.764	45440
															5.41	964.762	24511
															5.41	492.877	21100
															5.41	1429.7	13438
															5.42	566.57	35585
															5.42	1547.63	16432
															5.42	1432.66	15189
															5.42	1197.7	14799
															5.42	612.827	14583
															5.43	593.597	28305
															5.43	497.833	13653
															5.43	847.767	11944
															5.44	967.718	21221
															5.44	732.775	14545
															5.44	969.714	11937
															5.44	1202.66	11589
															5.45	647.46	133345
															5.45	548.504	99103
															5.45	549.508	28373
															5.45	972.677	21111
															5.45	617.784	14534
															5.46	1194.82	69796
															5.46	648.462	64565
															5.46	1195.82	54925
															5.46	502.787	50949
															5.46	622.739	30654
															5.46	1196.83	20069
															5.46	736.67	20023
															5.46	758.656	19142
															5.46	977.636	18520
															5.46	737.729	17605
															5.46	496.773	12251
															5.47	524.77	61014
															5.47	764.669	33936
															5.47	742.688	28884
															5.47	518.756	23652
															5.47	638.707	19650
															5.47	982.591	18726
															5.47	998.55	18351
															5.47	862.659	18219
															5.47	1124.52	17614
															5.47	900.591	16936
															5.47	504.786	16842
															5.47	1102.54	16422
															5.47	1097.56	16026
															5.47	878.601	15691
															5.47	1244.47	15232
															5.47	616.721	12823
															5.48	404.82	69802
															5.48	644.719	45466
															5.48	540.739	29342
															5.48	884.615	26929
															5.48	1004.57	22562
															5.48	660.688	22502
															5.48	526.767	20417
															5.48	780.637	18100
															5.48	766.663	17568
															5.48	906.596	16522
															5.48	886.609	15200
															5.48	922.57	13999
															5.48	1020.53	13858
															5.48	1118.5	12709
															5.48	1246.46	12502
															5.48	1042.52	10737
															5.48	1238.45	9585
															5.48	1260.43	8791
															5.49	666.702	29791
															5.49	420.789	26802
															5.49	786.646	23716
															5.49	562.721	21598
															5.49	704.653	19951
															5.49	682.668	18134
															5.49	824.593	15971
															5.49	1026.55	14256
															5.49	802.62	13690
															5.49	840.568	13618
															5.49	1162.47	12683
															5.49	1086.48	7912
															5.5	546.754	29477
															5.5	584.702	21285
															5.5	688.684	18748
															5.5	928.582	15324
															5.5	808.631	13852
															5.5	830.618	11293
															5.51	426.802	32891
															5.51	575.516	26247
															5.51	854.583	22067
															5.51	568.735	20848
															5.51	726.636	14291
															5.51	710.665	13047
															5.51	852.596	8490
															5.52	448.784	18457
															5.52	590.719	14006
															5.55	1215.74	23968
															5.55	569.434	19821
															5.56	413.266	138013
															5.56	553.46	23232
															5.57	587.548	42264
															5.58	414.269	38932
															5.58	1216.76	23723
															5.59	559.517	25937
															5.6	689.211	9617
															5.7	1733.65	14552
															5.84	413.265	102262
															5.85	689.21	11899
															6.29	689.211	15333
															6.46	1381.55	35807
															6.47	1380.55	52028
															6.47	1382.54	25769
															6.62	1437.56	39215
															6.62	1439.58	15780
															6.63	1438.56	35732
															7.26	1215.74	20281
															7.27	413.265	201936
															7.27	587.548	68575
															7.27	1199.77	24156
															7.27	1216.75	20274
															7.27	559.516	20023
															7.29	414.269	20384
															7.35	1742.41	17776
															7.35	508.888	15398
															7.38	1917.35	12806
															7.38	1630.46	12097
															7.4	399.918	69531
															7.4	502.862	56113
															7.4	488.849	39637
															7.4	413.933	33514
															7.4	534.89	22212
															7.4	516.88	22170
															7.42	404.933	36328
															7.42	1771.43	10573
															7.43	1386.56	17364
															7.44	1806.39	13130
															7.45	1192.62	14183
															7.66	1396.53	47932
															7.66	1397.52	24984
															7.73	830.256	19416
															7.74	811.286	55474
															7.74	811.786	52423
															7.74	1588.63	16310
															7.74	1382.55	15480
															7.75	1583.62	990964
															7.75	1584.62	736470
															7.75	1585.62	355326
															7.75	1586.63	128024
															7.75	792.312	119175
															7.75	792.812	99718
															7.75	1667.56	50129
															7.75	793.315	40731
															7.75	1381.54	33596
															7.75	830.762	28893
															7.75	1669.54	26093
															7.75	1735.54	25939
															7.75	793.817	22772
															7.75	812.288	20032
															7.76	1605.6	69044
															7.76	1606.6	58934
															7.76	1380.55	51781
															7.76	1587.62	46180
															7.76	1668.57	44491
															7.76	1607.59	28605
															7.76	1752.51	23459
															7.76	1736.58	22760
															7.77	803.304	13764
															7.78	1582.5	20672
															8.54	1439.47	42917
															8.54	1440.47	30653
															8.54	1507.46	19375
															8.55	1355.51	390004
															8.55	1356.51	253079
															8.55	1377.49	148820
															8.55	1357.52	115962
															8.55	1378.5	101764
															8.55	1358.53	54961
															8.55	1379.5	49085
															8.55	1445.48	28338
															8.55	1514.48	27679
															8.55	1446.5	22808
															8.55	1497.46	22782
															8.55	1359.54	21446
															8.55	1498.52	18253
															8.55	1508.46	16091
															8.55	1441.48	13270
															8.56	1513.45	35246
															8.56	1462.48	26729
															8.57	1785.42	13591
															8.58	1380.5	30311
															8.76	1599.62	21779
															8.77	1600.61	22311
															8.95	772.802	49165
															8.95	1566.58	34270
															8.96	1542.59	275339
															8.96	1543.6	197390
															8.96	771.799	111335
															8.96	1544.6	95536
															8.96	1564.57	78156
															8.96	772.302	73700
															8.96	1565.57	59052
															8.96	1545.59	50605
															8.96	1177.46	15350
															8.97	1649.54	22414
															8.97	790.774	20135
															8.97	773.302	16367
															9.86	413.266	73345
															9.91	1558.6	15262
															9.93	1556.6	13063
															9.94	1845.64	20464
															9.95	1835.62	34286
															9.95	1790.53	27284
															9.95	1914.58	22732
															9.95	937.301	18001
															9.95	1938.55	16244
															9.95	1691.56	11142
															9.95	1941.57	10291
															9.96	1542.6	56304
															9.96	1382.55	46342
															9.96	895.321	45918
															9.96	1830.61	36362
															9.96	1820.58	26265
															9.96	1827.56	24573
															9.96	1905.56	23487
															9.96	1981.52	23105
															9.96	945.794	22694
															9.96	875.847	21648
															9.96	1828.58	21528
															9.96	1881.58	20214
															9.96	1916.43	19578
															9.96	945.293	17938
															9.96	1849.6	15822
															9.96	906.312	15187
															9.96	1600.61	10862
															9.97	873.34	1152523
															9.97	873.842	926587
															9.97	1745.67	850207
															9.97	1746.68	699817
															9.97	874.343	473309
															9.97	1768.66	238873
															9.97	1748.68	146161
															9.97	1380.54	136996
															9.97	884.331	117065
															9.97	884.832	97614
															9.97	1381.55	96115
															9.97	875.345	62037
															9.97	1749.67	59120
															9.97	892.816	53555
															9.97	885.334	51532
															9.97	1543.6	51100
															9.97	1904.59	33621
															9.97	1853.62	30622
															9.97	1544.61	28915
															9.97	1846.59	28743
															9.97	937.806	28506
															9.97	1910.56	27737
															9.97	1826.58	27598
															9.97	1888.56	27423
															9.97	1903.6	27205
															9.97	885.834	26838
															9.97	1889.6	26077
															9.97	1836.68	24552
															9.97	1898.61	24180
															9.97	1757.65	23647
															9.97	1746.2	22888
															9.97	1897.61	22861
															9.97	1837.55	22605
															9.97	1871.58	22416
															9.97	1987.57	21696
															9.97	1919.54	21689
															9.97	896.327	21580
															9.97	963.289	21517
															9.97	1847.56	21022
															9.97	903.807	20844
															9.97	1980.49	20222
															9.97	1972.56	19844
															9.97	1912.58	19288
															9.97	1218.49	18825
															9.97	1756.61	18630
															9.97	966.288	18618
															9.97	1996.54	18602
															9.97	1758.05	18373
															9.97	1964.54	16453
															9.97	1963.54	14790
															9.97	1967.53	13963
															9.97	1747.18	13130
															9.97	955.298	12808
															9.97	1081.25	12676
															9.98	1747.68	363421
															9.98	1767.65	281465
															9.98	874.844	196266
															9.98	1769.66	122850
															9.98	1770.65	61115
															9.98	892.314	51229
															9.98	895.821	46389
															9.98	1829.61	44933
															9.98	1852.62	39293
															9.98	1825.6	33411
															9.98	1936.48	26372
															9.98	1768.18	24269
															9.98	1907.54	24250
															9.98	1757.19	24114
															9.98	1971.56	23851
															9.98	1961.52	22869
															9.98	1868.57	22063
															9.98	1927.56	21576
															9.98	1925.5	20561
															9.98	1915.51	19995
															9.98	1999.6	19478
															9.98	1908.47	19107
															9.98	1769.17	18311
															9.98	1993.52	17763
															9.98	966.783	17494
															9.98	1909.55	17305
															9.98	903.306	17097
															9.98	1946.51	16757
															9.98	1787.52	16333
															9.98	1219.49	16085
															9.98	956.291	15874
															9.98	1855.53	15202
															9.98	1992.51	13942
															9.98	1939.59	12143
															9.98	1488.63	10941
															9.99	893.316	27185
															9.99	1771.65	26725
															9.99	1988.58	24126
															9.99	1843.6	23536
															9.99	1906.54	21041
															9.99	1957.58	19123
															9.99	1920.54	17817
															9.99	1940.55	12935
															10	1887.54	30996
															10	1831.63	27498
															10	1851.6	23748
															10	1858.57	21593
															10	1867.61	21296
															10.01	1345.63	12160
															10.31	1749.68	10884
															10.33	1746.68	180934
															10.33	1767.65	65209
															10.33	1769.66	35679
															10.33	1381.54	18326
															10.33	885.331	15456
															10.33	892.319	14856
															10.33	895.319	13064
															10.34	873.341	255720
															10.34	1745.67	224206
															10.34	873.841	211368
															10.34	874.343	105314
															10.34	1747.68	100713
															10.34	1768.66	55035
															10.34	874.842	48884
															10.34	884.328	32779
															10.34	884.833	30815
															10.35	1748.67	41064
															10.35	1380.54	34766
															10.35	875.347	14899
															10.35	895.825	14498
															11.24	1704.64	24189
															12.59	1720.64	16610
															12.71	1907.73	117580
															12.71	1542.6	80479
															12.71	1909.73	63718
															12.71	973.339	30072
															12.71	973.842	29291
															12.71	1044.82	19132
															12.72	954.365	757011
															12.72	954.867	675410
															12.72	955.369	363363
															12.72	1908.73	110323
															12.72	965.356	98526
															12.72	976.348	76351
															12.72	1929.7	55785
															12.72	1930.71	49204
															12.72	962.877	44322
															12.72	963.38	36754
															12.72	1910.73	30303
															12.72	966.862	25741
															12.72	1018.84	18266
															12.72	1044.32	18241
															12.73	955.869	158285
															12.73	965.857	85293
															12.73	976.849	67343
															12.73	956.37	50593
															12.73	966.358	48515
															12.73	977.35	40519
															12.73	1544.61	38828
															12.73	1931.73	26928
															12.73	963.884	23078
															12.73	956.868	19984
															12.73	1381.54	17016
															12.73	1036.32	15181
															12.74	1543.6	64958
															12.74	1380.55	32636
															12.76	977.854	19591
															13.5	1464.55	30935
															14.07	1741.95	6218
															14.46	1464.58	68122
															14.48	1465.58	33282
															15	1250.48	23451
															15.59	1236.46	26170
															15.71	1215.75	25089
															15.78	1640.66	17161
															16.16	1627.62	17648
															16.18	1626.64	29595
															16.51	1237.47	29710
															16.52	1258.46	22155
															16.54	1236.47	57797
															17.06	1626.63	48199
															17.07	1627.63	45271
															17.08	1628.64	20615
															17.36	1215.75	21413

## Sheet: ABS+BKF
	UPLC peaks																3D MS1
Observed RT (min)	% Amount (%)	Observed Glucose Units	Observed m/z	Database Glucose Units	Theoretical m/z	GlycanAnalyzer assignment	Oxford notation	Notes								Retention time (min)	Observed mass (m/z)	Intensity (Counts)
4.27	0.76	4.2757	1031.4032 (+1H)	4.2653	1031.4038 (+1H)		M3									4	1723.68	11691
5.33	0.65	4.8861	1234.4792 (+1H)	4.8768	1234.4832 (+1H) 617.7452 (+2H)		A1									4.02	1220.69	28544
6.56	21.91	5.4874	1437.5632 (+1H) 719.2867(+2H)	5.4097	1437.563 (+1H) 719.285 (+2H)		A2									4.05	1318.67	29238
7.59	6.89	5.9074	1396.5373 (+1H)	5.7842	1396.5360 (+1H)		A1[3]G(4)1									4.12	1215.74	25912
8.49	5.77	6.2279	1355.509 (+1H)	6.1595	1355.5094 (+1H)		M5									4.12	1838.68	20889
8.7	37.86	6.3007	1599.6151 (+1H) 800.3107 (+2H)	6.2425	1599.6154 (+1H) 800.3113(+2H)		A2[6]G(4)1									4.13	460.827	65314
8.99	9.36	6.3959	1599.6151 (+1H) 800.3107 (+2H)	6.3572	1599.6154 (+1H) 800.3113(+2H)		A2[3]G(4)1									4.13	730.81	23570
9.83	0.48	6.659	1558.583 (+1H)	6.3572	1558.589 (+1H)		M4A1G1									4.13	1242.68	21058
11.38	16.32	7.125	1761.669 (+1H) 881.339 (+2H)	7.1773	1761.668 (+1H) 881.338 (+2H)		A2G(4)2									4.14	828.785	41807
																4.14	632.831	21505
																4.15	1117.76	20226
																4.15	1216.76	19089
																4.18	482.809	29764
																4.19	948.744	20700
																4.2	1046.72	19296
																4.21	530.929	26994
																4.27	1042.8	34654
																4.28	1064.78	19010
																4.31	748.866	28473
																4.31	1031.4	22902
																4.31	1032.41	11170
																4.32	846.843	28466
																4.34	1358.71	25250
																4.37	824.862	26143
																4.37	788.303	9322
																4.38	787.298	23257
																4.59	1260.72	29924
																4.6	1158.83	17372
																5.01	552.911	44652
																5.01	650.886	40402
																5.07	647.459	117953
																5.07	448.914	26450
																5.08	407.044	52508
																5.08	672.871	23918
																5.09	549.507	27103
																5.1	1038.87	19781
																5.15	868.823	17284
																5.16	1154.9	37451
																5.16	530.927	21823
																5.16	570.966	19655
																5.16	1430.8	12673
																5.17	451.008	62089
																5.17	744.937	50163
																5.17	940.889	38199
																5.17	962.872	36228
																5.17	1274.85	31468
																5.17	1760.83	26908
																5.17	1136.84	16950
																5.17	1082.83	16810
																5.17	1256.8	15800
																5.17	846.844	12753
																5.17	561.86	12312
																5.17	1518.69	11358
																5.17	1238.73	8782
																5.18	413.265	63095
																5.18	842.915	56615
																5.18	646.961	51369
																5.18	864.896	28785
																5.18	1056.92	28111
																5.18	694.851	18167
																5.18	618.857	17850
																5.18	1372.83	16111
																5.18	1176.88	13954
																5.18	748.862	12614
																5.18	1879.67	12149
																5.18	858.882	11354
																5.18	966.776	8493
																5.19	454.934	76823
																5.19	770.85	44976
																5.19	596.875	21705
																5.19	1568.78	20961
																5.19	575.514	18123
																5.19	1590.77	18093
																5.19	1354.77	16980
																5.19	1162.75	16694
																5.19	702.867	16560
																5.19	574.891	14899
																5.19	1376.77	11881
																5.19	877.792	10918
																5.19	1644.8	10909
																5.19	1773.8	10707
																5.19	568.883	10289
																5.19	1332.8	9451
																5.19	1104.82	9402
																5.2	1196.82	56183
																5.2	1180.81	13887
																5.2	1470.82	13088
																5.2	890.803	11013
																5.2	1938.73	10840
																5.2	1880.75	10838
																5.2	886.878	10522
																5.2	1908.68	8112
																5.21	1492.82	17071
																5.21	448.913	13050
																5.21	1246.76	11824
																5.27	1779.88	8024
																5.28	947.897	11286
																5.28	1598.88	8481
																5.29	482.967	13031
																5.3	1248.93	21095
																5.3	1676.92	15464
																5.3	1440.95	14525
																5.3	1133.95	10349
																5.3	1960.88	9819
																5.3	1975.92	9374
																5.3	1613.43	9113
																5.31	1495.94	30703
																5.31	1955.9	21542
																5.31	575.982	21301
																5.31	1792.93	19860
																5.31	1939.91	19440
																5.31	1736.9	19233
																5.31	1919.94	18942
																5.31	1670.91	18589
																5.31	1709.93	18448
																5.31	1940.9	18286
																5.31	1053.98	18267
																5.31	1739.91	17668
																5.31	1863.9	17222
																5.31	1748.91	16470
																5.31	1941.93	16134
																5.31	1507.91	15845
																5.31	1746.93	15385
																5.31	1459.95	15061
																5.31	1677.87	14746
																5.31	1658.88	14729
																5.31	1270.9	14318
																5.31	1018.94	14016
																5.31	1381.95	13741
																5.31	1898.9	13491
																5.31	1506.91	13108
																5.31	1283.97	12677
																5.31	1976.91	12489
																5.31	1591.98	12191
																5.31	1803.93	11835
																5.31	1688.94	11794
																5.31	1745.92	11676
																5.31	1513.97	11654
																5.31	1391.94	11649
																5.31	1228.96	11277
																5.31	1432.42	11173
																5.31	1554.42	10659
																5.31	1286.97	10598
																5.31	1275.46	10204
																5.31	1858.9	10171
																5.31	1160.46	9909
																5.31	1806.91	9727
																5.31	987.97	9586
																5.31	1266.47	9480
																5.31	995.484	9074
																5.31	1217.96	9031
																5.31	1390.45	8807
																5.31	1209.45	8378
																5.31	1515.94	8102
																5.31	1341.45	8062
																5.31	1737.43	7519
																5.31	881.483	7485
																5.32	707.999	99298
																5.32	1052.98	78990
																5.32	1167.97	62160
																5.32	593.005	57638
																5.32	939.983	54045
																5.32	1282.97	34891
																5.32	1397.96	34325
																5.32	478.01	33652
																5.32	1169.97	32061
																5.32	920.97	30307
																5.32	824.989	29205
																5.32	1380.95	28225
																5.32	1512.95	28068
																5.32	1402.93	27608
																5.32	1725.92	26817
																5.32	1517.92	25826
																5.32	1284.96	25155
																5.32	1857.93	24869
																5.32	1399.96	24834
																5.32	1742.94	24591
																5.32	1500.9	24288
																5.32	1152.95	23734
																5.32	1627.94	23542
																5.32	1842.92	23216
																5.32	1747.91	22821
																5.32	1737.87	22087
																5.32	1840.92	21853
																5.32	1727.93	21813
																5.32	1514.95	21732
																5.32	1749.91	21591
																5.32	1497.94	21429
																5.32	938.986	21332
																5.32	1478.92	21223
																5.32	1744.94	21012
																5.32	1629.95	20748
																5.32	1802.93	20467
																5.32	1612.93	20417
																5.32	1593.93	19988
																5.32	1864.9	19646
																5.32	1862.89	19549
																5.32	1921.91	19343
																5.32	1907.91	18855
																5.32	1614.91	18791
																5.32	1555.93	18717
																5.32	1785.94	18562
																5.32	1174.93	18487
																5.32	1852.92	18330
																5.32	1859.9	18239
																5.32	1037.96	18217
																5.32	1967.98	18167
																5.32	1804.94	18067
																5.32	1972.92	17962
																5.32	1710.91	17931
																5.32	1572.95	17695
																5.32	1906.89	17630
																5.32	1841.92	17365
																5.32	1843.9	17241
																5.32	1973.83	16886
																5.32	1518.93	16878
																5.32	1936.92	16774
																5.32	1480.92	16700
																5.32	1833.92	16592
																5.32	1979.9	16349
																5.32	1168.97	16079
																5.32	1917.91	15864
																5.32	1961.89	15727
																5.32	1949.91	15609
																5.32	1498.94	15528
																5.32	1731.91	15506
																5.32	1726.94	15332
																5.32	1706.96	15163
																5.32	1786.92	14908
																5.32	1496.93	14805
																5.32	1277.94	14506
																5.32	1704.97	14500
																5.32	1398.88	14345
																5.32	1981.91	14324
																5.32	1227.98	14020
																5.32	595.003	13902
																5.32	1441.93	13807
																5.32	1669.87	13728
																5.32	823.991	13707
																5.32	1516.42	13656
																5.32	997.969	13653
																5.32	1662.44	13643
																5.32	1727.41	13604
																5.32	1498.42	13533
																5.32	1331.95	13339
																5.32	922.964	13220
																5.32	1276.95	13075
																5.32	1036.96	12994
																5.32	1447.94	12993
																5.32	1573.95	12842
																5.32	1384.42	12822
																5.32	1861.92	12821
																5.32	1590.01	12811
																5.32	1958.91	12803
																5.32	1266.95	12766
																5.32	1171.96	12746
																5.32	1334.44	12745
																5.32	1631.96	12735
																5.32	1996.93	12524
																5.32	714.951	12427
																5.32	708.998	12404
																5.32	1661.42	12378
																5.32	1499.4	12344
																5.32	1476.97	12297
																5.32	1728.93	12283
																5.32	1860.9	12236
																5.32	1401.95	11799
																5.32	1861.39	11768
																5.32	1450.43	11690
																5.32	1669.44	11672
																5.32	1743.93	11571
																5.32	1738.92	11530
																5.32	1729.39	11505
																5.32	1628.94	11503
																5.32	1324.41	11482
																5.32	1211.94	11269
																5.32	1516.95	11262
																5.32	1612.44	11203
																5.32	1614.41	10965
																5.32	1044.47	10619
																5.32	1562.93	10617
																5.32	1286.45	10491
																5.32	1269.95	10470
																5.32	986.969	10383
																5.32	1323.45	10217
																5.32	1670.43	10189
																5.32	1497.43	10152
																5.32	1102.96	9903
																5.32	1274.41	9742
																5.32	1055.46	9638
																5.32	1055.97	9636
																5.32	1553.97	9635
																5.32	1564.43	9612
																5.32	1170.45	9611
																5.32	1101.95	9589
																5.32	1216.96	9549
																5.32	1104.45	9476
																5.32	1505.44	9320
																5.32	998.96	9152
																5.32	940.982	9143
																5.32	1615.41	8841
																5.32	765.498	8827
																5.32	1110.47	8724
																5.32	1170.97	8632
																5.32	1045.48	8431
																5.32	989.453	8324
																5.32	1105.44	8320
																5.32	880.491	8312
																5.32	1111.48	8292
																5.32	1711.92	8250
																5.32	996.477	8245
																5.32	1841.43	8240
																5.32	1225.47	8196
																5.32	1401.45	7732
																5.32	1226.47	7301
																5.32	940.463	7193
																5.33	937.986	122622
																5.33	822.992	79749
																5.33	1035.96	41378
																5.33	1150.96	40644
																5.33	1054.98	37871
																5.33	1172.93	37225
																5.33	1265.95	33723
																5.33	709.995	31261
																5.33	1610.93	29468
																5.33	1287.93	28883
																5.33	1845.89	23368
																5.33	1632.91	22085
																5.33	1708.93	21380
																5.33	1957.93	21212
																5.33	1984.9	19984
																5.33	1634.9	19979
																5.33	1404.92	19875
																5.33	1267.95	19653
																5.33	1900.92	19518
																5.33	1289.92	19444
																5.33	1363.94	19274
																5.33	1519.92	19190
																5.33	1966.92	19141
																5.33	1977.92	18727
																5.33	1729.93	18682
																5.33	1844.92	18371
																5.33	1851.89	17789
																5.33	1974.93	17711
																5.33	1821.88	17446
																5.33	1622.91	17293
																5.33	1846.88	17261
																5.33	1382.94	17248
																5.33	1671.92	16990
																5.33	1978.91	16878
																5.33	1959.9	16579
																5.33	1499.92	16343
																5.33	1689.94	16341
																5.33	1918.93	16331
																5.33	1613.93	15482
																5.33	1853.92	14980
																5.33	1795.42	14505
																5.33	1602.92	14310
																5.33	1621.89	14213
																5.33	1617.89	14080
																5.33	1611.93	13856
																5.33	1439.45	13363
																5.33	1474.99	13306
																5.33	1954.92	13223
																5.33	1332.95	13150
																5.33	1268.45	12523
																5.33	1430.93	12175
																5.33	1565.43	11913
																5.33	1680.4	11762
																5.33	1161.94	11757
																5.33	1554.95	11341
																5.33	1383.44	11244
																5.33	1344.94	11204
																5.33	1056.98	10557
																5.33	1631.44	10356
																5.33	1784.91	10321
																5.33	1438.44	10310
																5.33	882.977	10209
																5.33	1786.41	10197
																5.33	1315.45	9778
																5.33	1269.43	9704
																5.33	1159.46	9553
																5.33	1890.9	9544
																5.33	1113.96	9290
																5.33	1151.46	8927
																5.33	1335.44	8628
																5.33	929.477	8412
																5.33	825.475	8339
																5.33	1056.46	8127
																5.34	1057.94	36737
																5.34	1615.9	25683
																5.34	690.978	22310
																5.34	1938.92	21163
																5.34	1847.88	20875
																5.34	1948.9	19312
																5.34	1732.88	19092
																5.34	1059.93	18238
																5.34	1824.92	17679
																5.34	1956.93	16853
																5.34	1633.93	16561
																5.34	1767.92	16506
																5.34	1112.97	15552
																5.34	1791.9	15488
																5.34	1457.97	15391
																5.34	1325.95	15129
																5.34	1819.96	14444
																5.34	1920.92	14117
																5.34	1556.93	13291
																5.34	1728.43	12915
																5.34	941.978	12582
																5.34	1151.95	12415
																5.34	1547.43	12278
																5.34	1360	10857
																5.34	1901.9	10698
																5.35	1730.89	26984
																5.35	1823.91	20036
																5.35	1687.94	17446
																5.35	1672.9	17237
																5.35	1962.88	13433
																5.35	1595.92	12231
																5.35	1931.89	12149
																5.35	1660.92	10448
																5.36	942.943	73563
																5.36	827.948	51424
																5.36	944.938	30620
																5.36	805.978	24379
																5.36	1808.91	17938
																5.36	1387.9	16359
																5.36	1825.91	16267
																5.36	1947.91	15672
																5.36	1826.91	13832
																5.36	1594.93	11424
																5.36	1902.91	9077
																5.37	1502.89	20328
																5.37	1922.91	16427
																5.37	1385.91	14912
																5.37	1942.9	10628
																5.38	712.954	59431
																5.38	714.951	18154
																5.38	1155.92	15401
																5.38	1248.93	12979
																5.38	1538.93	9711
																5.38	1364.95	9160
																5.39	597.96	29422
																5.39	829.943	19405
																5.39	1828.88	14294
																5.39	1943.86	13087
																5.39	1807.91	12667
																5.39	1133.94	12643
																5.39	1483.88	12599
																5.39	1960.88	12266
																5.39	1135.94	12179
																5.39	1924.93	12125
																5.39	1884.8	11437
																5.39	1040.92	10754
																5.39	1577.92	10599
																5.39	1062.9	10102
																5.39	1830.88	10099
																5.39	1692.92	9853
																5.39	1157.92	9154
																5.39	1579.9	9097
																5.39	1292.88	8625
																5.39	1366.94	8586
																5.4	1234.48	33218
																5.4	1235.48	20334
																5.4	1829.88	13465
																5.4	925.916	13174
																5.4	1867.88	12168
																5.4	949.897	11894
																5.4	1236.49	11750
																5.4	1713.87	11062
																5.4	1368.89	11028
																5.4	1790.92	10647
																5.4	1177.9	9647
																5.4	1827.92	8931
																5.41	947.898	23523
																5.41	482.967	17678
																5.41	717.909	15329
																5.41	832.902	13941
																5.41	810.926	13094
																5.41	1988.86	12205
																5.41	1912.84	11993
																5.41	1927.86	11546
																5.41	1905.9	11223
																5.41	1817.88	10939
																5.41	1675.91	10931
																5.41	1138.89	10559
																5.41	1160.86	10387
																5.41	1560.89	9601
																5.41	1253.89	9588
																5.41	1697.9	8874
																5.41	1445.91	8759
																5.41	1895.89	8710
																5.41	1813.85	8702
																5.41	1850.87	8556
																5.41	1699.88	8488
																5.42	580.941	14295
																5.42	952.85	13970
																5.42	602.915	12262
																5.42	1023.9	8771
																5.43	565.566	103085
																5.46	548.504	113801
																5.47	593.599	52481
																5.47	549.507	33728
																5.48	502.791	14960
																5.49	648.462	56303
																5.49	838.836	26519
																5.49	524.77	24107
																5.5	647.459	177612
																5.5	404.833	38152
																5.51	574.87	30879
																5.52	1196.82	59533
																5.52	694.844	20649
																5.53	454.926	66714
																5.54	680.481	35365
																5.54	576.525	27245
																5.55	672.857	16693
																5.55	766.909	15607
																5.56	552.902	24993
																5.56	1042.8	22878
																5.57	546.884	33735
																5.57	1180.79	17948
																5.58	476.905	88248
																5.58	962.864	49926
																5.58	842.902	46843
																5.58	1274.84	38113
																5.58	1060.84	37488
																5.58	1372.83	15471
																5.6	413.265	92919
																5.6	940.885	30437
																5.6	1154.89	28017
																5.6	1158.81	18122
																5.61	470.893	46606
																5.61	1082.81	44737
																5.61	646.954	36702
																5.61	886.868	36003
																5.61	984.841	22824
																5.62	1056.91	41131
																5.62	770.845	33448
																5.62	429.025	20306
																5.62	689.208	10994
																5.64	498.896	68352
																5.66	864.886	56224
																5.67	407.043	60276
																5.68	451.007	46185
																5.68	880.85	43861
																5.68	1176.87	30481
																5.69	548.979	75484
																5.69	958.94	33933
																5.69	570.961	26025
																5.76	432.938	156034
																5.76	552.898	37551
																5.76	574.877	26795
																5.77	429.014	38333
																5.77	530.914	27409
																5.78	526.991	73996
																5.79	410.956	64627
																5.79	650.867	39064
																5.8	722.938	29748
																5.82	1002.89	28087
																5.82	792.794	22638
																5.92	410.956	64627
																5.92	744.919	33380
																5.93	1158.81	14339
																5.94	668.927	30309
																5.95	574.875	38511
																5.95	530.915	32843
																6.11	1194.82	147727
																6.3	451.007	76873
																6.3	689.211	42374
																6.3	684.262	31708
																6.31	690.215	12899
																6.4	647.458	158826
																6.4	958.942	31949
																6.44	548.982	89567
																6.45	570.964	45148
																6.54	462.962	38284
																6.61	861.224	21330
																6.62	908.25	19756
																6.62	1673.54	13404
																6.62	731.278	11494
																6.62	1559.55	10571
																6.62	1072.44	10209
																6.63	1437.56	1048206
																6.63	1438.57	712425
																6.63	1439.57	316714
																6.63	1459.55	165461
																6.63	1460.55	114995
																6.63	1440.57	111980
																6.63	741.267	53022
																6.63	801.245	37747
																6.63	741.768	37392
																6.63	1441.57	34793
																6.63	730.781	31385
																6.63	730.276	29364
																6.63	1557.52	28999
																6.63	1579.5	27975
																6.63	801.749	27440
																6.63	719.788	26011
																6.63	1535.53	22349
																6.63	742.268	15918
																6.63	1633.54	15776
																6.63	802.247	14906
																6.63	738.753	14705
																6.63	921.207	12296
																6.63	1096.41	11335
																6.63	798.235	9126
																6.63	809.235	8547
																6.64	1461.55	50442
																6.64	719.287	30301
																6.64	848.776	22202
																6.64	1558.52	21907
																6.64	1234.48	21165
																6.64	1580.51	19113
																6.64	861.725	17100
																6.64	1573.48	13749
																6.64	1655.5	13687
																6.64	1235.48	13292
																6.64	858.217	10866
																6.64	738.257	10266
																6.64	848.269	9877
																6.64	1574.48	9307
																6.64	862.222	9248
																6.65	1462.56	22963
																6.65	1536.54	15426
																6.66	812.239	9481
																6.79	796.539	17563
																7.22	1860.69	12461
																7.39	668.941	28695
																7.44	451.007	142538
																7.45	413.266	105184
																7.45	476.913	34417
																7.45	586.931	27788
																7.46	592.946	29814
																7.47	548.983	55305
																7.47	1222.85	38674
																7.47	429.024	33755
																7.48	570.964	39411
																7.5	575.514	27970
																7.51	647.458	73467
																7.51	608.912	40049
																7.51	658.999	26398
																7.51	760.899	21105
																7.52	662.925	24329
																7.53	542.967	34714
																7.53	520.984	27492
																7.56	564.948	39064
																7.57	466.973	22217
																7.58	444.99	64423
																7.58	794.918	20000
																7.6	700.871	23038
																7.65	1418.52	32059
																7.65	1419.52	26054
																7.66	1396.54	296514
																7.66	1397.54	191053
																7.66	1398.54	88079
																7.66	1399.55	33309
																7.66	717.749	15566
																7.66	1420.52	13943
																7.76	1929.6	10169
																8.34	608.913	27313
																8.54	1358.52	26926
																8.54	1379.5	21136
																8.55	1378.5	44057
																8.56	1355.51	259456
																8.56	1356.51	162282
																8.56	1357.51	75058
																8.56	1377.49	70429
																8.64	936.865	15698
																8.72	1978.57	14251
																8.73	1532.63	23737
																8.73	1964.55	18506
																8.74	1958.57	16751
																8.74	1938.56	14373
																8.75	986.77	24299
																8.75	1721.55	23727
																8.75	1691.58	21617
																8.75	1055.25	19911
																8.76	1697.61	32757
																8.76	1743.59	29042
																8.76	1698.59	26110
																8.76	1813.62	23257
																8.76	1957.58	21457
																8.76	820.289	20586
																8.76	1837.55	20146
																8.76	1046.25	20132
																8.76	1995.59	18751
																8.76	1626.62	18725
																8.76	1923.56	18018
																8.76	1881.57	17987
																8.76	812.307	16025
																8.76	1929.57	15976
																8.76	927.287	12770
																8.76	1986.56	12319
																8.76	1739.59	12215
																8.76	998.258	11196
																8.77	1599.62	1437296
																8.77	800.311	134065
																8.77	800.812	102786
																8.77	1623.6	102214
																8.77	822.794	51050
																8.77	819.788	46602
																8.77	801.313	43002
																8.77	882.27	40868
																8.77	811.302	40303
																8.77	1604.63	36734
																8.77	879.768	35908
																8.77	1719.57	33045
																8.77	811.801	32711
																8.77	929.804	31316
																8.77	937.78	28789
																8.77	1742.54	28702
																8.77	997.252	28657
																8.77	1729.64	25995
																8.77	989.771	25292
																8.77	1829.61	24774
																8.77	926.286	23870
																8.77	926.789	23352
																8.77	1855.53	23159
																8.77	1706.61	22768
																8.77	1686.6	21916
																8.77	1752.54	21501
																8.77	1610.65	21357
																8.77	1008.73	21333
																8.77	942.25	20559
																8.77	1005.74	20387
																8.77	1830.6	20097
																8.77	1793.61	20037
																8.77	1831.61	19835
																8.77	1058.75	19764
																8.77	1617.67	19390
																8.77	989.269	18669
																8.77	1682.61	18515
																8.77	1932.54	17791
																8.77	1952.57	17423
																8.77	1679.61	17409
																8.77	1639.61	17292
																8.77	1622.12	17169
																8.77	1005.24	17077
																8.77	1972.55	16828
																8.77	1768.59	16239
																8.77	1893.6	16122
																8.77	945.27	15870
																8.77	1258.45	14976
																8.77	1057.73	14719
																8.77	1869.58	14708
																8.77	994.249	14569
																8.77	880.264	14243
																8.77	1044.28	14188
																8.77	1930.5	13641
																8.77	1106.23	13181
																8.77	1612.64	13121
																8.78	1600.62	1079763
																8.78	1601.62	520853
																8.78	1621.6	280672
																8.78	1602.63	207540
																8.78	1622.6	206826
																8.78	1603.63	76672
																8.78	822.292	53421
																8.78	882.771	48157
																8.78	819.282	47085
																8.78	1735.53	36900
																8.78	1741.55	33822
																8.78	937.279	32103
																8.78	1683.58	31347
																8.78	929.294	30012
																8.78	1234.48	29250
																8.78	1625.62	28789
																8.78	879.264	27623
																8.78	997.756	27474
																8.78	940.277	26239
																8.78	1818.62	25342
																8.78	1720.59	24409
																8.78	1738.57	23791
																8.78	1751.53	23549
																8.78	1757.56	23152
																8.78	1867.57	22326
																8.78	986.264	22297
																8.78	1839.59	22016
																8.78	1611.59	21579
																8.78	890.759	21563
																8.78	1000.27	20893
																8.78	1852.58	20471
																8.78	1046.74	20385
																8.78	1844.58	20209
																8.78	1699.62	20199
																8.78	1850.6	20156
																8.78	823.296	19827
																8.78	801.818	19817
																8.78	1619.64	19490
																8.78	1600.1	19474
																8.78	1235.49	19283
																8.78	883.272	19032
																8.78	1611.12	18924
																8.78	1725.67	18824
																8.78	939.247	18595
																8.78	1861.54	18562
																8.78	948.266	18476
																8.78	1396.52	18374
																8.78	1112.22	18200
																8.78	1879.55	17873
																8.78	1057.24	17259
																8.78	942.761	17213
																8.78	1701.58	16893
																8.78	1849.57	16790
																8.78	1730.64	16626
																8.78	1960.54	16429
																8.78	1644.64	16292
																8.78	1008.24	16134
																8.78	1786.59	15533
																8.78	1943.59	15363
																8.78	1637.57	14993
																8.78	939.747	14774
																8.78	1779.62	14551
																8.78	1907.56	13799
																8.78	1659.62	13641
																8.78	1747.57	13340
																8.78	1052.26	13237
																8.78	1875.59	12613
																8.78	1049.25	10833
																8.79	1624.62	56779
																8.79	1736.57	38154
																8.79	1836.63	32230
																8.79	1835.63	29195
																8.79	1684.59	27436
																8.79	1689.59	26113
																8.79	1950.6	24547
																8.79	1737.58	23000
																8.79	1726.68	22930
																8.79	1796.57	21439
																8.79	1854.58	20673
																8.79	1690.65	17833
																8.79	890.254	17472
																8.79	1857.61	16176
																8.79	1115.24	15693
																8.79	938.284	14851
																8.79	1614.63	14695
																8.8	940.78	28242
																8.8	1685.62	25138
																8.8	1860.62	21268
																8.8	1820.58	19872
																8.8	1811.62	18592
																8.8	1104.25	17144
																8.8	950.229	12890
																8.81	1795.58	24898
																8.81	1851.59	22228
																8.81	1605.65	21092
																8.81	1709.62	20191
																8.81	1959.63	16096
																8.81	1711.6	15728
																8.81	1764.65	15296
																8.82	1999.64	17387
																8.82	1902.56	17313
																8.82	1926.59	12717
																8.96	647.457	64677
																8.99	680.98	20275
																9.06	811.8	27195
																9.06	882.271	22700
																9.06	801.813	14399
																9.06	1234.48	13108
																9.07	1599.61	313459
																9.07	1600.62	237988
																9.07	1601.62	123743
																9.07	800.31	69796
																9.07	1621.6	64114
																9.07	800.814	61126
																9.07	1602.62	59044
																9.07	1622.6	40417
																9.07	1623.6	29216
																9.07	822.795	29136
																9.07	801.314	26900
																9.07	822.292	26219
																9.07	811.303	24585
																9.08	1603.62	28984
																9.08	882.769	26634
																9.37	851.263	17703
																9.38	846.309	20116
																9.89	1558.58	28227
																9.9	1559.58	22674
																11.12	1545.73	13273
																11.29	647.458	66437
																11.42	1846.62	14604
																11.42	1867.63	10477
																11.43	1396.53	28293
																11.43	1881.63	21044
																11.43	1482.67	17235
																11.44	882.842	59041
																11.44	892.828	52271
																11.44	903.318	38422
																11.44	1765.68	37794
																11.45	1761.67	351948
																11.45	881.339	294386
																11.45	1762.67	286388
																11.45	881.84	239006
																11.45	1763.67	156463
																11.45	882.342	123877
																11.45	1764.68	80446
																11.45	1783.65	70206
																11.45	1784.66	67149
																11.45	1785.66	40856
																11.45	963.798	25625
																11.45	1010.82	22547
																11.45	893.333	21042
																11.45	883.342	18204
																11.45	904.319	16790
																11.45	963.297	13684
																11.45	1882.62	12859
																11.45	960.291	10203
																11.46	903.819	51821
																11.46	892.328	40178
																11.46	1397.54	18197
																11.47	1786.62	27140
																11.47	900.31	21370
																11.48	900.811	35439
																11.69	647.458	58234
																11.87	678.477	18185
																12.05	946.933	36737
																12.08	946.431	23397
																12.09	947.43	15615
																12.45	1498.61	17303
																12.6	1720.64	28195
																12.62	1722.65	16139
																12.88	1318.53	30370
																12.88	1319.54	20940
																13.43	1947.55	12097
																13.63	1318.52	37034
																13.64	1319.53	26846
																14.82	1822.59	10299
																15.55	1480.58	67095
																15.55	1482.59	22845
																15.56	1481.58	52583
																15.56	1532.66	18493
																15.59	1236.47	38786
																15.6	1237.47	22519
																16.25	1482.62	44313
																16.27	1480.58	78943
																16.28	1481.58	54738
																16.28	1503.56	26377
																16.3	1502.55	17595
																16.51	1258.46	13360
																16.52	1236.47	51050
																16.53	1237.47	31798
																16.6	1480.58	29410
																16.62	1481.59	25749

## Sheet: ABS+BKF+BTG
	UPLC peaks																3D MS1
Observed RT (min)	% Amount (%)	Observed Glucose Units	Observed m/z	Database Glucose Units	Theoretical m/z	GlycanAnalyzer assignment	Oxford notation	Notes								Retention time (min)	Observed mass (m/z)	Intensity (Counts)
4.24	0.46	4.2547	1031.4011 (+1H)	4.2653	1031.4038 (+1H)		M3									4	1629.63	20937
5.32	7.76	4.8834	1234.4819 (+1H) 618.8445 (+2H)	4.8768	1234.4832 (+1H) 617.7452 (+2H)		A1									4	1340.65	14946
6.55	84.26	5.4839	1437.563 (+1H) 719.285 (+2H)	5.4097	1437.563 (+1H) 719.285 (+2H)		A2									4.04	403.229	23294
7.2	0.48	5.7554	1396.5288 (+1H)	5.7026	1396.5360 (+1H) 698.7716 (+2H)		M4A1									4.06	527.157	11556
8.48	5.87	6.2244	1355.5088 (+1H)	6.1595	1355.5094 (+1H)		M5									4.07	730.81	27702
8.97	0.65	6.3879	?	?	?	?	?									4.12	1412.72	27069
9.77	0.52	6.6393	1558.5893 (+1H)	6.647	1558.5888 (+1H) 779.7980 (+2H)		M5A1									4.12	1216.76	22591
																4.13	1314.74	31009
																4.14	828.786	24094
																4.15	1527.73	18661
																4.15	1336.72	15760
																4.16	438.844	65109
																4.16	1144.7	34224
																4.18	632.832	33842
																4.19	548.503	86371
																4.19	460.826	49353
																4.19	1242.67	22456
																4.2	1162.76	21200
																4.22	752.791	18425
																4.22	824.862	15708
																4.24	748.863	17665
																4.26	1024.74	18853
																4.27	556.839	18603
																4.28	1216.76	27089
																4.29	1238.74	36594
																4.29	482.808	25180
																4.31	1031.4	29105
																4.31	1032.4	14606
																4.35	846.842	31286
																4.35	1554.66	21524
																4.38	552.91	32449
																4.46	468.976	10142
																4.46	512.941	9258
																4.46	490.959	8047
																4.46	588.935	7861
																4.61	846.841	57550
																4.61	552.91	55227
																4.69	842.912	45961
																4.71	1256.81	29736
																4.99	1278.78	26915
																5.07	587.547	21270
																5.11	1496.73	12290
																5.13	568.882	20272
																5.14	566.888	37814
																5.14	1492.79	24162
																5.15	1256.8	34739
																5.16	680.481	31493
																5.16	1274.85	26783
																5.17	864.893	32622
																5.17	570.965	29556
																5.17	1038.87	24076
																5.17	1398.75	16078
																5.17	1056.92	15215
																5.17	690.925	13975
																5.18	744.937	33247
																5.18	596.872	28984
																5.18	546.89	27356
																5.18	1928.65	24860
																5.18	407.043	20251
																5.18	1930.71	15567
																5.19	413.264	76085
																5.19	646.959	53029
																5.19	962.87	43323
																5.19	552.91	31829
																5.19	876.8	25666
																5.19	1154.9	24994
																5.19	650.886	23575
																5.19	958.941	21794
																5.19	1110.78	20008
																5.19	672.866	19970
																5.19	1688.77	19147
																5.19	748.86	19124
																5.19	1372.81	18738
																5.19	1176.88	18468
																5.19	868.821	16096
																5.19	1252.87	13435
																5.19	432.947	13341
																5.19	792.823	12489
																5.19	502.828	12466
																5.19	988.775	12333
																5.19	1568.78	11185
																5.19	1162.77	7263
																5.19	1999.66	7202
																5.2	852.771	26274
																5.2	1196.81	26180
																5.2	1222.82	22826
																5.2	766.918	21405
																5.2	886.874	19633
																5.2	1376.75	19466
																5.2	1354.77	18346
																5.2	416.37	17273
																5.2	1964.65	15630
																5.2	858.882	15599
																5.2	890.799	15171
																5.2	1514.69	15074
																5.2	1322.75	13691
																5.2	590.861	13662
																5.2	1636.76	12311
																5.2	880.852	11739
																5.2	1260.67	10884
																5.2	1572.71	10677
																5.2	1278.78	10595
																5.2	1796.71	10541
																5.2	786.818	9576
																5.2	1448.81	9114
																5.2	1911.73	8796
																5.2	1790.65	7399
																5.2	1530.76	6735
																5.2	980.917	6222
																5.21	1042.79	19817
																5.21	1606.75	12348
																5.21	1787.75	10225
																5.21	1924.75	8756
																5.21	1978.72	7924
																5.23	902.813	13482
																5.31	1987.9	8997
																5.32	1598.85	17369
																5.32	1941.9	14191
																5.32	1792.9	14129
																5.32	1861.9	12657
																5.32	1726.91	12100
																5.32	1746.85	11949
																5.32	1331.93	11848
																5.32	1774.9	11726
																5.32	1474.98	11045
																5.32	1891.91	10691
																5.32	1449.42	10553
																5.32	1217.95	9541
																5.32	1548.39	9538
																5.32	1795.39	9516
																5.32	925.921	9198
																5.32	1997.91	7814
																5.32	1949.88	6691
																5.32	996.474	6072
																5.33	1282.96	28651
																5.33	1397.96	24739
																5.33	1169.97	23498
																5.33	1265.95	23269
																5.33	824.989	21878
																5.33	1380.94	21271
																5.33	1862.82	20509
																5.33	1284.96	19439
																5.33	1152.95	19073
																5.33	1399.95	17946
																5.33	1727.92	17806
																5.33	1842.9	17322
																5.33	1806.9	16999
																5.33	1744.93	16889
																5.33	1953.91	16666
																5.33	1825.92	16584
																5.33	1972.82	16393
																5.33	1785.92	16285
																5.33	1823.87	16060
																5.33	1857.92	15875
																5.33	1594.93	15713
																5.33	1629.94	15629
																5.33	1737.89	15263
																5.33	1676.89	15250
																5.33	1614.92	15195
																5.33	1267.95	15075
																5.33	1710.92	15048
																5.33	1622.82	14857
																5.33	1392.89	14579
																5.33	1940.89	14188
																5.33	1808.9	14147
																5.33	1955.92	14082
																5.33	1687.95	13954
																5.33	1831.89	13891
																5.33	1859.91	13807
																5.33	1660.94	13329
																5.33	1931.89	13282
																5.33	1112.98	13252
																5.33	1591.96	13102
																5.33	1844.39	12864
																5.33	1053.97	12852
																5.33	1227.97	12803
																5.33	1711.91	12701
																5.33	1947.9	12503
																5.33	1844.91	12503
																5.33	1335.43	12475
																5.33	1951.88	12410
																5.33	1611.84	12334
																5.33	1710.35	12162
																5.33	1672.85	12151
																5.33	1633.94	11937
																5.33	1401.99	11915
																5.33	1803.86	11843
																5.33	1706.95	11774
																5.33	1689.94	11724
																5.33	1513.94	11555
																5.33	1925.83	11504
																5.33	1920.87	11023
																5.33	1904.91	10958
																5.33	1288.94	10733
																5.33	1546.43	10716
																5.33	1439.44	10602
																5.33	1266.94	10587
																5.33	1556.9	10559
																5.33	1398.96	10451
																5.33	1171.96	10409
																5.33	1545.42	10311
																5.33	1835.87	10275
																5.33	1482.92	10271
																5.33	1326.93	10226
																5.33	1476.99	10029
																5.33	941.983	9981
																5.33	1729.43	9975
																5.33	1778.41	9967
																5.33	1680.43	9886
																5.33	1431.43	9771
																5.33	1442.92	9757
																5.33	1161.95	9646
																5.33	1669.43	9470
																5.33	1219.43	9451
																5.33	1036.96	9439
																5.33	1918.92	9382
																5.33	1728.92	9354
																5.33	1268.44	8966
																5.33	708.996	8881
																5.33	1153.94	8803
																5.33	1044.47	8773
																5.33	1276.94	8768
																5.33	1660.42	8741
																5.33	1776.44	8712
																5.33	940.459	8557
																5.33	1159.46	8325
																5.33	1269.42	7986
																5.33	1602.41	7941
																5.33	1274.45	7817
																5.33	989.444	7709
																5.33	1969.89	7653
																5.33	1458.94	7500
																5.33	1104.44	7480
																5.33	940.981	7362
																5.33	1102.96	7229
																5.33	880.488	7181
																5.33	1105.44	6989
																5.33	1209.46	6879
																5.33	1170.46	6838
																5.33	941.461	5804
																5.34	937.983	93740
																5.34	707.997	71414
																5.34	1052.98	61596
																5.34	822.992	59890
																5.34	1167.97	42742
																5.34	593.003	42716
																5.34	939.981	41675
																5.34	1035.96	34574
																5.34	1057.93	33888
																5.34	1150.95	32572
																5.34	1054.97	29746
																5.34	1287.93	27719
																5.34	478.009	25418
																5.34	766.525	25231
																5.34	920.966	24820
																5.34	1402.92	23572
																5.34	709.996	23107
																5.34	1512.95	23093
																5.34	1725.92	22897
																5.34	1730.9	22448
																5.34	1500.9	22130
																5.34	1495.94	21598
																5.34	1517.92	21366
																5.34	1960.88	21017
																5.34	1708.91	20026
																5.34	1713.89	19920
																5.34	1845.89	19710
																5.34	1747.86	19595
																5.34	1841.89	19323
																5.34	1133.94	19297
																5.34	1627.95	19107
																5.34	1037.96	18700
																5.34	1497.93	18525
																5.34	1593.92	18441
																5.34	1632.91	18380
																5.34	1610.93	18375
																5.34	1612.93	18345
																5.34	1174.93	18279
																5.34	1943.86	18201
																5.34	1742.93	18185
																5.34	1840.93	17931
																5.34	1617.88	17747
																5.34	1289.92	17733
																5.34	1974.9	17671
																5.34	1018.95	17571
																5.34	1514.95	17528
																5.34	1852.86	17386
																5.34	1059.93	17291
																5.34	1979.89	17043
																5.34	1709.91	16996
																5.34	1802.95	16824
																5.34	690.979	16651
																5.34	938.988	16585
																5.34	1847.87	16516
																5.34	1828.86	16507
																5.34	1900.93	16281
																5.34	1749.9	16200
																5.34	1967.88	15913
																5.34	1893.88	15804
																5.34	1917.82	15790
																5.34	1363.93	15724
																5.34	1387.9	15707
																5.34	1864.9	15575
																5.34	1964.92	15539
																5.34	1912.87	15341
																5.34	1921.92	15336
																5.34	1479.94	15205
																5.34	1958.82	15199
																5.34	1787.91	15196
																5.34	1919.93	15183
																5.34	1966.87	15002
																5.34	1480.92	14927
																5.34	1634.92	14892
																5.34	1858.95	14840
																5.34	1922.92	14800
																5.34	1595.91	14724
																5.34	1977.91	14702
																5.34	1729.91	14602
																5.34	1603.85	14565
																5.34	1956.83	14526
																5.34	1939.9	14473
																5.34	1903.9	14421
																5.34	1961.89	14399
																5.34	1507.88	14393
																5.34	1984.89	14385
																5.34	1843.92	14339
																5.34	1715.86	14328
																5.34	1688.93	14266
																5.34	1670.93	14223
																5.34	1597.89	14163
																5.34	1440.95	14080
																5.34	1824.9	14070
																5.34	1501.9	14033
																5.34	1499.92	13973
																5.34	1613.9	13962
																5.34	1834.89	13900
																5.34	1892.9	13881
																5.34	1748.9	13814
																5.34	1786.91	13795
																5.34	1555.93	13774
																5.34	1382.94	13705
																5.34	1883.88	13641
																5.34	1901.91	13524
																5.34	1978.91	13426
																5.34	1957.9	13421
																5.34	1863.89	13332
																5.34	1751.88	13227
																5.34	1250.9	13174
																5.34	1959.91	13077
																5.34	1731.89	13077
																5.34	1963.89	12807
																5.34	1403.85	12757
																5.34	1767.93	12756
																5.34	1432.43	12703
																5.34	1374.91	12655
																5.34	1496.93	12608
																5.34	1616.88	12548
																5.34	1717.87	12502
																5.34	1727.42	12490
																5.34	1441.9	12413
																5.34	595.001	12400
																5.34	1545.92	12305
																5.34	1325.94	12291
																5.34	1827.89	12290
																5.34	1983.88	12261
																5.34	1908.89	12243
																5.34	922.962	12136
																5.34	1924.91	11930
																5.34	1704.93	11775
																5.34	1365.92	11718
																5.34	1968.91	11716
																5.34	1386.9	11627
																5.34	1168.97	11577
																5.34	1573.93	11358
																5.34	1738.93	11317
																5.34	1574.94	11205
																5.34	1720.4	11192
																5.34	1707.95	11146
																5.34	1384.93	11131
																5.34	1784.91	11114
																5.34	1677.92	11053
																5.34	1095.97	11043
																5.34	1364.95	10978
																5.34	1614.41	10967
																5.34	1628.95	10900
																5.34	1173.94	10878
																5.34	1794.9	10810
																5.34	1151.96	10684
																5.34	1845.38	10601
																5.34	1662.44	10489
																5.34	997.978	10347
																5.34	1381.94	10302
																5.34	1056.98	10250
																5.34	1450.42	10247
																5.34	1283.98	10207
																5.34	823.991	10198
																5.34	1566.41	10140
																5.34	1269.94	10000
																5.34	1718.43	9877
																5.34	1603.42	9859
																5.34	1332.95	9855
																5.34	1558.39	9810
																5.34	1499.41	9517
																5.34	1516.94	9202
																5.34	1047.95	9078
																5.34	1441.42	8859
																5.34	1153.43	8656
																5.34	1324.44	8382
																5.34	1113.96	8313
																5.34	1615.42	8292
																5.34	1497.43	8037
																5.34	1323.43	7743
																5.34	1160.46	7432
																5.34	931.948	7289
																5.34	1268.95	7257
																5.34	1038.96	7220
																5.35	942.94	68853
																5.35	712.953	56364
																5.35	827.947	48364
																5.35	597.959	34158
																5.35	944.938	30417
																5.35	1172.93	30189
																5.35	482.965	27421
																5.35	1270.91	25634
																5.35	1385.9	22162
																5.35	1615.89	21442
																5.35	805.973	19827
																5.35	1478.91	19679
																5.35	829.944	19316
																5.35	1830.87	18760
																5.35	1869.88	18079
																5.35	1938.88	17304
																5.35	1404.91	16835
																5.35	1248.94	16716
																5.35	1519.91	16635
																5.35	1769.91	16524
																5.35	1732.88	16514
																5.35	1962.87	16130
																5.35	1851.86	15869
																5.35	575.982	15741
																5.35	1502.88	15719
																5.35	1522.88	15660
																5.35	1692.9	15396
																5.35	1971.88	15326
																5.35	1562.93	15187
																5.35	1272.9	15116
																5.35	1572.95	15068
																5.35	1671.9	15037
																5.35	1796.92	14944
																5.35	1907.92	14838
																5.35	1973.9	14623
																5.35	1906.88	14534
																5.35	1890.91	14471
																5.35	1712.9	14224
																5.35	1846.89	14116
																5.35	1691.91	13878
																5.35	1981.88	13557
																5.35	943.944	13485
																5.35	1596.93	12980
																5.35	1506.91	12921
																5.35	1488.91	12630
																5.35	1565.42	12098
																5.35	1788.9	11993
																5.35	1739.39	11962
																5.35	1734.9	11531
																5.35	1606.9	11096
																5.35	1589.96	11032
																5.35	1058.93	10413
																5.35	1671.41	10385
																5.35	1910.38	10342
																5.35	1673.9	10309
																5.35	1342.97	10271
																5.35	1518.93	10184
																5.35	1936.88	10095
																5.35	1944.91	9708
																5.35	1564.42	9680
																5.35	1796.37	9456
																5.35	1826.43	9003
																5.35	1481.92	8766
																5.35	1211.93	8189
																5.35	1923.89	8133
																5.35	1046.95	7732
																5.35	1975.9	7705
																5.35	1039.95	7466
																5.36	1177.88	17029
																5.36	714.95	16978
																5.36	1807.91	16289
																5.36	1605.88	15676
																5.36	1849.84	15390
																5.36	1982.9	15323
																5.36	1430.35	14568
																5.36	1902.9	14266
																5.36	1965.81	14259
																5.36	1334.44	13917
																5.36	1848.88	13126
																5.36	1809.88	13021
																5.36	1249.96	11812
																5.36	1875.92	11460
																5.36	1950.88	11437
																5.36	1905.92	9504
																5.36	1462.88	9286
																5.36	1942.87	7175
																5.37	1155.91	25681
																5.37	1826.91	16521
																5.37	1790.91	15671
																5.37	1948.86	15093
																5.37	1292.9	13241
																5.37	1040.92	12504
																5.37	1157.9	11751
																5.37	1483.88	11355
																5.37	1368.85	10799
																5.37	1946.89	6213
																5.38	1332.44	24437
																5.38	1333.44	16753
																5.38	1031.4	11676
																5.38	1829.89	11172
																5.38	1560.9	10773
																5.38	1062.9	10483
																5.38	1600.86	9825
																5.38	1714.88	8183
																5.39	1236.49	120877
																5.39	1237.49	35386
																5.39	832.904	21694
																5.39	810.926	19949
																5.39	1253.91	9822
																5.39	1850.85	9370
																5.4	1234.48	493640
																5.4	1235.48	288563
																5.4	947.898	29823
																5.4	717.91	15708
																5.4	1238.49	13038
																5.4	949.893	10258
																5.4	1138.89	9061
																5.4	1275.86	9007
																5.41	952.851	11581
																5.41	1160.87	8752
																5.41	1445.91	8593
																5.41	1023.9	8375
																5.42	602.916	14634
																5.42	580.939	12198
																5.42	487.922	11620
																5.42	815.878	6541
																5.43	1256.46	33323
																5.43	1257.46	23049
																5.43	699.702	8874
																5.47	548.503	82150
																5.47	549.506	47192
																5.48	648.461	56387
																5.48	524.772	26685
																5.48	502.787	17659
																5.49	404.833	37973
																5.49	634.877	19269
																5.49	644.721	11377
																5.51	492.877	33091
																5.51	574.882	32772
																5.52	1194.81	222155
																5.52	1732.69	18015
																5.53	694.839	21248
																5.54	470.893	39984
																5.55	770.845	38008
																5.55	962.86	36836
																5.55	766.905	21419
																5.55	672.855	18090
																5.55	984.845	16979
																5.56	1278.77	23320
																5.56	1300.75	15990
																5.57	647.458	167687
																5.57	864.889	37976
																5.57	646.953	28916
																5.57	1060.84	24191
																5.57	552.901	19368
																5.57	886.863	11980
																5.58	1158.82	21941
																5.58	744.925	13020
																5.59	448.91	44458
																5.59	1612.73	28249
																5.6	413.264	77162
																5.6	476.903	74476
																5.6	618.844	23495
																5.6	1372.8	23472
																5.6	1154.89	21664
																5.61	498.895	61109
																5.61	1082.81	30068
																5.61	1296.82	11662
																5.62	575.513	41221
																5.62	1042.8	29831
																5.62	1056.91	24092
																5.63	548.978	53661
																5.63	1196.82	51111
																5.63	570.96	31927
																5.63	568.876	31912
																5.63	689.21	13265
																5.64	451.008	36567
																5.64	596.863	32890
																5.64	1274.86	25377
																5.64	1176.86	24015
																5.64	958.937	21737
																5.65	1195.82	66036
																5.65	416.37	31146
																5.65	842.907	25943
																5.66	454.92	51493
																5.66	548.503	36489
																5.66	1222.82	13812
																5.68	744.917	23870
																5.7	646.953	53536
																5.72	552.893	31702
																5.73	432.937	42788
																5.73	530.913	35339
																5.73	429.013	34575
																5.73	668.92	31436
																5.73	672.845	21972
																5.73	650.864	21589
																5.74	410.956	53108
																5.75	526.986	33084
																5.76	908.823	31201
																5.78	407.031	32058
																5.78	1126.76	17910
																5.91	410.956	34569
																5.93	432.938	60935
																5.93	668.928	33413
																5.94	574.88	80464
																5.94	672.856	26808
																5.94	788.875	23506
																5.95	429.014	52956
																5.96	454.922	54700
																5.97	1194.81	64582
																5.98	596.859	26482
																6.13	498.896	71128
																6.15	1419.56	18387
																6.15	1420.55	10718
																6.17	413.265	101697
																6.18	451.005	61893
																6.26	564.948	46483
																6.26	1887.67	12960
																6.29	689.209	13430
																6.35	587.546	35935
																6.43	646.959	24812
																6.47	1195.82	55143
																6.47	1222.83	20770
																6.47	1216.75	15717
																6.48	575.514	27285
																6.48	1199.78	23863
																6.48	906.831	19632
																6.49	902.826	22125
																6.49	570.963	14623
																6.49	706.89	14334
																6.49	576.525	14138
																6.49	586.93	13712
																6.59	970.2	14699
																6.59	812.733	12940
																6.59	1025.7	11748
																6.59	965.72	11171
																6.6	1758.52	22251
																6.6	812.236	22030
																6.6	1483.64	21764
																6.6	1523.54	21198
																6.6	869.716	20377
																6.6	1740.53	19120
																6.6	1419.66	18657
																6.6	1603.51	18288
																6.6	850.235	17925
																6.6	1876.47	16329
																6.6	929.192	15635
																6.6	1839.16	14242
																6.6	1888.45	13693
																6.6	925.219	13232
																6.6	1816.16	12636
																6.61	742.27	42716
																6.61	908.251	36958
																6.61	1582.51	29324
																6.61	1689.52	28336
																6.61	921.206	26835
																6.61	968.728	26172
																6.61	859.755	25584
																6.61	1817.5	25351
																6.61	1701.47	24934
																6.61	1782.5	24675
																6.61	1583.57	23933
																6.61	1907.49	23780
																6.61	1824.52	23702
																6.61	1709.48	23261
																6.61	1702.57	23050
																6.61	919.233	22351
																6.61	1890.52	22022
																6.61	1827.49	21915
																6.61	976.21	21775
																6.61	1904.47	20776
																6.61	965.22	20736
																6.61	1698.5	20711
																6.61	1841.48	20692
																6.61	1962.54	20567
																6.61	1840.53	20400
																6.61	1492.55	20235
																6.61	1028.21	20187
																6.61	910.214	19659
																6.61	1849.53	19498
																6.61	1649.52	19072
																6.61	1952.55	19036
																6.61	1630.49	18953
																6.61	1028.7	18769
																6.61	1918.47	18457
																6.61	1646.5	18392
																6.61	1017.21	18261
																6.61	1981.44	17997
																6.61	1953.49	17892
																6.61	1882.44	17768
																6.61	1960.47	17457
																6.61	1859.49	17415
																6.61	867.235	17303
																6.61	1984.47	17286
																6.61	1641.49	17157
																6.61	1072.23	17056
																6.61	1458.56	16986
																6.61	1946.47	16642
																6.61	809.734	16385
																6.61	870.23	16377
																6.61	1639.98	16314
																6.61	1894.51	16011
																6.61	1493.54	15820
																6.61	1468.55	15704
																6.61	1759.45	15289
																6.61	1619.5	15134
																6.61	1792.17	14221
																6.61	845.759	13016
																6.61	1469.57	12920
																6.61	1667.98	12685
																6.61	802.744	12594
																6.61	849.272	12004
																6.61	860.263	11961
																6.61	967.194	11237
																6.61	1493.21	11192
																6.61	731.778	11013
																6.62	1441.57	159849
																6.62	741.267	140698
																6.62	1558.53	104725
																6.62	1234.48	95940
																6.62	1535.54	91948
																6.62	730.276	88202
																6.62	730.778	70472
																6.62	801.747	66531
																6.62	1573.5	60421
																6.62	1559.53	58903
																6.62	1537.54	47280
																6.62	1674.55	46050
																6.62	1678.49	45670
																6.62	738.26	45017
																6.62	1595.5	41540
																6.62	1699.48	41441
																6.62	1771.51	40764
																6.62	1521.52	38845
																6.62	720.289	38515
																6.62	738.763	34478
																6.62	1596.51	32869
																6.62	1497.55	31934
																6.62	1815.48	31745
																6.62	1679.49	30992
																6.62	798.735	30863
																6.62	731.278	30626
																6.62	1538.54	29966
																6.62	1788.5	29724
																6.62	1776.47	29553
																6.62	1686.53	29318
																6.62	1671.45	29294
																6.62	1694.49	28448
																6.62	1475.51	28381
																6.62	908.752	27837
																6.62	1569.56	27045
																6.62	1798.4	27026
																6.62	1601.47	26648
																6.62	848.271	26440
																6.62	1696.49	26290
																6.62	1773.49	26057
																6.62	1668.54	25944
																6.62	1517.51	25793
																6.62	1795.54	25588
																6.62	1627.52	25495
																6.62	1486.55	25407
																6.62	1516.51	25316
																6.62	1476.56	25193
																6.62	1682.51	25111
																6.62	1617.54	25015
																6.62	1569.01	24983
																6.62	1606.53	24755
																6.62	858.216	24744
																6.62	1482.61	24559
																6.62	1628.49	24375
																6.62	1885.45	24273
																6.62	1687.5	24201
																6.62	1566.54	23680
																6.62	1872.56	23640
																6.62	1666.47	23432
																6.62	1902.48	23319
																6.62	1539.51	23213
																6.62	1851.47	23181
																6.62	1567.55	23084
																6.62	1097.41	22869
																6.62	1803.47	22628
																6.62	1684.51	22621
																6.62	1654.53	22568
																6.62	1639.5	22566
																6.62	1446.59	22489
																6.62	1823.55	22387
																6.62	1802.41	22289
																6.62	1774.5	22279
																6.62	1450.56	22272
																6.62	1724.51	22271
																6.62	1703.48	21666
																6.62	1547.04	21652
																6.62	1735.49	21575
																6.62	1629.51	21545
																6.62	1645.49	21340
																6.62	1937.5	21238
																6.62	1745.53	21128
																6.62	1913.5	21086
																6.62	1729.5	20918
																6.62	1789.55	20877
																6.62	1792.47	20822
																6.62	1750.55	20808
																6.62	1236.48	20687
																6.62	1704.46	20579
																6.62	1604.54	20400
																6.62	1737.47	20355
																6.62	1765.5	20302
																6.62	1718.55	20293
																6.62	1805.46	20249
																6.62	1717.5	20190
																6.62	1766.51	19863
																6.62	1853.46	19800
																6.62	1638.57	19736
																6.62	1578.52	19724
																6.62	1748.48	19706
																6.62	1850.48	19690
																6.62	1866.45	19598
																6.62	1880.58	19559
																6.62	1518.52	19544
																6.62	1556.55	19505
																6.62	1964.47	19471
																6.62	1725.49	19421
																6.62	1768.52	19329
																6.62	1627.02	19292
																6.62	1763.52	19041
																6.62	1822.48	18942
																6.62	1785.51	18793
																6.62	1507.55	18685
																6.62	918.199	18634
																6.62	1769.45	18626
																6.62	1445.59	18597
																6.62	1864.45	18569
																6.62	720.788	18544
																6.62	1778.47	18503
																6.62	1728.5	18498
																6.62	1982.49	18414
																6.62	1892.49	18264
																6.62	1875.52	18257
																6.62	1762.5	18247
																6.62	1543.56	18152
																6.62	1905.46	18094
																6.62	1895.45	18047
																6.62	1451.58	17969
																6.62	1529.54	17959
																6.62	1847.49	17891
																6.62	1721.46	17849
																6.62	1608.51	17782
																6.62	957.236	17707
																6.62	1922.46	17687
																6.62	1531.53	17630
																6.62	1958.45	17528
																6.62	1536.06	17480
																6.62	1506.53	17330
																6.62	905.238	17247
																6.62	1932.46	16936
																6.62	1925.49	16925
																6.62	973.203	16841
																6.62	1944.4	16738
																6.62	1571.54	16674
																6.62	1986.44	16596
																6.62	1757.48	16502
																6.62	1659.51	16322
																6.62	1834.47	15878
																6.62	1488.06	15850
																6.62	1033.2	15840
																6.62	1628.93	15822
																6.62	1746.47	15810
																6.62	1452.54	15588
																6.62	969.229	15571
																6.62	1616.05	15535
																6.62	1640.97	15222
																6.62	845.261	15150
																6.62	1455.1	14948
																6.62	1764.96	14885
																6.62	1036.19	14826
																6.62	858.723	14751
																6.62	1554.55	14616
																6.62	1596.02	14277
																6.62	1572.55	14126
																6.62	1644.98	14029
																6.62	1625.97	13900
																6.62	1645.95	13735
																6.62	1818.2	13581
																6.62	1656	13479
																6.62	1676	13291
																6.62	1726.98	12934
																6.62	1633.97	12439
																6.62	1537.05	12426
																6.62	1654.01	12140
																6.62	1884.48	12118
																6.62	1618.99	12003
																6.62	1609.52	11430
																6.62	917.233	9856
																6.62	1451.14	9847
																6.62	1098.41	9661
																6.62	1948.45	9543
																6.62	1835.9	9328
																6.62	1445.21	8233
																6.63	1437.56	5373587
																6.63	1438.57	3644483
																6.63	1439.57	1629193
																6.63	1459.55	1000029
																6.63	1460.55	676541
																6.63	1440.57	558187
																6.63	1461.55	296923
																6.63	1557.52	147972
																6.63	1579.5	141998
																6.63	719.285	133655
																6.63	1462.56	115459
																6.63	1580.51	102534
																6.63	741.769	97198
																6.63	719.787	91063
																6.63	1536.54	78207
																6.63	1438.07	76187
																6.63	1655.5	62558
																6.63	1449.05	60109
																6.63	1677.49	57650
																6.63	1449.56	53976
																6.63	1235.49	53922
																6.63	1442.58	53890
																6.63	1448.56	53067
																6.63	861.226	53012
																6.63	1460.04	52708
																6.63	1673.54	51880
																6.63	1096.4	48720
																6.63	1656.5	48207
																6.63	1633.51	48151
																6.63	1574.5	48023
																6.63	1463.56	44280
																6.63	1439.06	41308
																6.63	1519.53	41185
																6.63	848.773	39608
																6.63	1700.48	38513
																6.63	1520.52	38426
																6.63	850.766	37751
																6.63	1693.47	35730
																6.63	1560.55	35076
																6.63	1695.49	35039
																6.63	1072.43	34160
																6.63	1753.49	34148
																6.63	1509.04	34129
																6.63	1498.55	34097
																6.63	1509.54	33996
																6.63	1520.03	33759
																6.63	1775.45	33590
																6.63	1657.51	33496
																6.63	1675.52	33413
																6.63	1575.51	32344
																6.63	1793.51	32161
																6.63	1508.54	31592
																6.63	1450.06	31540
																6.63	1635.52	31364
																6.63	1546.54	30952
																6.63	1754.48	30650
																6.63	802.247	30648
																6.63	1787.49	30398
																6.63	798.238	30288
																6.63	1527.53	29944
																6.63	1498.04	29885
																6.63	1794.49	29672
																6.63	1590.49	29385
																6.63	1731.51	29058
																6.63	1461.05	29051
																6.63	1652.58	28965
																6.63	1810.53	28923
																6.63	1568.52	28840
																6.63	1658.49	28683
																6.63	1869.5	28625
																6.63	1870.49	28322
																6.63	1522.53	27827
																6.63	1528.53	27723
																6.63	872.72	27650
																6.63	1690.51	27366
																6.63	1589.5	27265
																6.63	1797.45	27043
																6.63	1680.55	27006
																6.63	1576.51	26905
																6.63	1755.51	26875
																6.63	1711.52	26746
																6.63	1618.5	26192
																6.63	1464.56	26174
																6.63	1697.53	26037
																6.63	1577.5	25691
																6.63	1738.49	25482
																6.63	1813.46	25439
																6.63	1743.49	25071
																6.63	1672.49	24878
																6.63	1558.02	24858
																6.63	1487.56	24662
																6.63	1732.49	24429
																6.63	1968.49	24398
																6.63	1784.49	24230
																6.63	1664.5	24190
																6.63	1663.56	24108
																6.63	1749.55	24106
																6.63	1591.48	24092
																6.63	1808.5	23975
																6.63	1733.49	23961
																6.63	1547.54	23960
																6.63	1726.48	23861
																6.63	1651.55	23813
																6.63	1832.49	23794
																6.63	1691.51	23766
																6.63	1801.51	23744
																6.63	1642.52	23704
																6.63	1615.53	23697
																6.63	1579.98	23548
																6.63	1665.51	23456
																6.63	1830.52	23421
																6.63	1607.52	23382
																6.63	1478.56	23198
																6.63	1636.49	23053
																6.63	1796.52	22995
																6.63	1545.54	22828
																6.63	1499.55	22798
																6.63	1640.5	22787
																6.63	1928.53	22783
																6.63	862.225	22768
																6.63	1653.5	22672
																6.63	1889.52	22636
																6.63	1505.55	22496
																6.63	1800.5	22452
																6.63	1791.48	22352
																6.63	1873.46	22149
																6.63	1930.51	22100
																6.63	1487.05	22024
																6.63	1669.55	21991
																6.63	1807.49	21961
																6.63	1712.5	21773
																6.63	1549.55	21741
																6.63	1688.46	21719
																6.63	1614.62	21675
																6.63	1585.54	21576
																6.63	1967.49	21495
																6.63	1587.53	21466
																6.63	1989.47	21319
																6.63	1597.51	21245
																6.63	1908.49	21181
																6.63	1565.51	21171
																6.63	1521.03	21168
																6.63	1705.46	21010
																6.63	1637.49	20853
																6.63	1707.57	20847
																6.63	1532.56	20641
																6.63	1456.55	20629
																6.63	1825.5	20580
																6.63	1914.48	20337
																6.63	1931.48	20236
																6.63	1786.52	20211
																6.63	1650.5	20195
																6.63	1833.5	20124
																6.63	742.769	20107
																6.63	1457.04	20054
																6.63	1623.5	20006
																6.63	1624.52	20006
																6.63	1949.45	19996
																6.63	1734.47	19906
																6.63	1517.01	19823
																6.63	1618	19651
																6.63	1510.06	19611
																6.63	1524.54	19597
																6.63	1799.45	19440
																6.63	1588.5	19436
																6.63	1781.53	19398
																6.63	1643.51	19385
																6.63	1867.48	19377
																6.63	1845.51	19319
																6.63	1525.54	19297
																6.63	1951.46	19208
																6.63	1879.54	19187
																6.63	1563.56	19186
																6.63	1727.52	19135
																6.63	1073.44	19066
																6.63	1917.45	18983
																6.63	1592.47	18972
																6.63	1940.45	18948
																6.63	1764.5	18922
																6.63	1670.54	18839
																6.63	1938.46	18699
																6.63	1511.63	18566
																6.63	1843.52	18474
																6.63	1488.63	18421
																6.63	1821.47	18346
																6.63	1559.05	18301
																6.63	1911.48	18217
																6.63	1632.51	18184
																6.63	1530.53	18091
																6.63	1467.56	18087
																6.63	1567.03	17973
																6.63	1584.53	17903
																6.63	1477.55	17792
																6.63	1723.46	17781
																6.63	981.185	17762
																6.63	1844.46	17751
																6.63	856.253	17691
																6.63	1838.43	17673
																6.63	1900.51	17645
																6.63	869.207	17591
																6.63	1965.48	17518
																6.63	1540.51	17511
																6.63	1858.53	17449
																6.63	1602.49	17439
																6.63	1975.48	17279
																6.63	1661.51	17075
																6.63	1878.46	17021
																6.63	1924.5	16733
																6.63	1747.47	16634
																6.63	1555.54	16581
																6.63	1631.51	16089
																6.63	739.262	16001
																6.63	1779.5	15932
																6.63	1611.5	15894
																6.63	1630.01	15757
																6.63	1580.99	15641
																6.63	1625.52	15563
																6.63	1996.43	15407
																6.63	1662.58	15309
																6.63	1636.99	15108
																6.63	924.217	15077
																6.63	978.178	14929
																6.63	987.198	14893
																6.63	1899.53	14858
																6.63	1566	14833
																6.63	1950.43	14582
																6.63	1638.03	14459
																6.63	1037.2	14421
																6.63	865.233	14238
																6.63	1705.01	14011
																6.63	1624.03	13736
																6.63	1693.97	12843
																6.63	1976.47	12827
																6.63	985.21	12745
																6.63	1578	12628
																6.63	790.25	12359
																6.63	1683.98	11895
																6.63	1500.52	11682
																6.63	1951.18	10679
																6.63	1978.44	7568
																6.64	801.246	92973
																6.64	1581.51	53908
																6.64	861.726	43883
																6.64	1634.51	40619
																6.64	1772.52	30555
																6.64	1667.51	29923
																6.64	859.25	29642
																6.64	1715.46	29237
																6.64	1809.47	27855
																6.64	1683.51	27170
																6.64	1752.55	26638
																6.64	1777.51	26106
																6.64	1510.63	25483
																6.64	1443.6	25472
																6.64	1692.5	25358
																6.64	1616.55	25053
																6.64	1626.5	25000
																6.64	1676.51	24950
																6.64	1457.57	24885
																6.64	916.729	24821
																6.64	968.222	24676
																6.64	1812.43	24554
																6.64	1436.55	24376
																6.64	1544.53	24029
																6.64	872.215	23879
																6.64	856.752	23720
																6.64	1819.51	23278
																6.64	1730.53	23181
																6.64	1435.55	23103
																6.64	1681.51	22904
																6.64	1713.47	22579
																6.64	1570.52	22550
																6.64	1455.55	22469
																6.64	1790.47	22176
																6.64	1561.55	22100
																6.64	1722.46	22099
																6.64	1644.46	22099
																6.64	1811.5	21939
																6.64	1806.53	21801
																6.64	1893.47	21531
																6.64	809.232	21428
																6.64	1985.46	21340
																6.64	1961.45	21338
																6.64	1744.57	21299
																6.64	1742.52	21161
																6.64	1842.56	21072
																6.64	1987.46	20909
																6.64	1739.48	20809
																6.64	1820.51	20753
																6.64	1710.51	20542
																6.64	1963.48	20476
																6.64	1814.5	20455
																6.64	1886.44	20368
																6.64	1770.47	20278
																6.64	1706.47	20263
																6.64	1783.49	20235
																6.64	1708.48	20183
																6.64	1973.47	19828
																6.64	927.213	19791
																6.64	1714.49	19738
																6.64	1861.49	19703
																6.64	1927.5	19688
																6.64	1828.47	19527
																6.64	1570.01	19483
																6.64	1971.49	19316
																6.64	1499.04	19116
																6.64	1548.55	19040
																6.64	1612.53	19033
																6.64	1916.45	18936
																6.64	1622.54	18884
																6.64	1874.49	18743
																6.64	1860.48	18737
																6.64	1929.43	18665
																6.64	1621.56	18600
																6.64	1829.47	18564
																6.64	1883.49	18489
																6.64	1465.6	18369
																6.64	1897.47	18289
																6.64	1906.45	18247
																6.64	1576.99	18089
																6.64	1852.44	17626
																6.64	1720.5	17259
																6.64	1719.48	17210
																6.64	927.718	16964
																6.64	1620.51	16814
																6.64	1863.47	16742
																6.64	1947.47	16416
																6.64	1988.12	16280
																6.64	1767.51	16254
																6.64	1831.43	16252
																6.64	1848.5	16147
																6.64	1977.46	16127
																6.64	1865.47	16076
																6.64	966.23	15929
																6.64	1503.56	15688
																6.64	1635.03	15506
																6.64	1490.55	15039
																6.64	1935.46	14769
																6.64	1621.25	14650
																6.64	1039.2	14336
																6.64	1933.5	14254
																6.64	1957.49	13995
																6.64	913.223	13708
																6.64	1709.19	13681
																6.64	1440.08	13607
																6.64	1506	13279
																6.64	1881.53	12992
																6.64	1990.52	12180
																6.64	1688.95	11562
																6.64	1686.99	10143
																6.64	1452.9	9636
																6.64	987.678	8555
																6.65	1891.51	26532
																6.65	1685.5	25552
																6.65	1761.5	22588
																6.65	1605.53	22441
																6.65	1716.47	21763
																6.65	1837.44	20880
																6.65	1741.52	20509
																6.65	1647.53	19797
																6.65	1923.45	19655
																6.65	1564.57	19515
																6.65	1903.53	19189
																6.65	1871.49	19027
																6.65	1856.51	19016
																6.65	984.196	18729
																6.65	1915.52	18515
																6.65	1939.44	18467
																6.65	1598.53	18391
																6.65	905.729	17873
																6.65	1994.47	17576
																6.65	1988.46	16843
																6.65	1910.47	16515
																6.65	1699.15	16336
																6.65	1607.02	16318
																6.65	1044.18	16157
																6.65	930.212	16077
																6.65	1919.4	14846
																6.65	1642.99	14717
																6.65	926.191	14098
																6.65	1628.03	13849
																6.65	1533.2	12019
																6.65	1942.46	11995
																6.65	1835.47	8664
																6.65	1786.15	7164
																6.66	1030.68	25522
																6.66	916.228	22653
																6.66	1836.49	20285
																6.66	976.73	20108
																6.66	979.209	19964
																6.66	1660.55	19925
																6.66	1898.52	19627
																6.66	1826.49	19113
																6.66	909.254	18670
																6.66	1945.56	18260
																6.66	1026.22	16919
																6.66	866.221	16603
																6.66	1874.13	16272
																6.66	921.709	15716
																6.66	1750.12	15073
																6.66	1023.22	14995
																6.66	932.199	14562
																6.66	1551.55	14080
																6.66	873.218	12779
																6.66	919.738	9889
																6.66	1444.57	5734
																6.67	1839.5	21629
																6.67	1454.58	20953
																6.67	1838.13	16807
																6.67	1760.11	16423
																6.67	922.206	15741
																6.67	1950.05	13898
																6.67	1904.94	13647
																6.67	1303.63	9846
																6.67	1025.2	8700
																6.67	812.747	8357
																6.67	1107.18	7231
																6.68	1970.58	20800
																6.68	1143.19	15549
																6.68	1612.16	13483
																6.68	1888.56	9533
																6.68	1319.63	7761
																6.69	1881.53	11810
																6.69	1864.17	9235
																6.7	1397.57	9609
																6.75	684.908	17877
																6.76	564.95	27325
																6.77	476.913	29803
																6.79	472.989	22397
																6.79	614.928	16477
																6.81	648.461	49803
																6.81	570.965	32955
																6.82	1194.81	103744
																6.82	575.514	48813
																6.82	1200.78	26912
																6.83	413.265	95001
																6.83	1215.75	28368
																6.84	608.913	25880
																6.84	668.941	24304
																6.85	1195.82	64027
																6.87	1820.72	12100
																6.88	826.845	14094
																6.89	1222.83	39389
																7.26	648.46	52203
																7.27	1397.53	28638
																7.27	1398.54	14573
																7.27	1418.47	13028
																7.28	1396.53	41127
																7.31	1221.83	28141
																7.33	684.904	49604
																7.33	451.006	45846
																7.34	548.982	46937
																7.34	592.947	17161
																7.35	706.887	31028
																7.35	476.913	22575
																7.36	413.265	97428
																7.36	575.514	34204
																7.36	472.988	32066
																7.36	1222.84	19394
																7.36	614.927	9797
																7.37	647.458	177663
																7.37	608.913	31196
																7.37	804.861	16940
																7.38	648.46	52203
																7.39	586.929	17594
																7.4	564.947	41699
																7.42	470.897	32838
																7.42	448.915	22502
																7.43	1659.65	10273
																7.44	542.965	23853
																7.45	444.99	33298
																7.47	1742.59	13517
																7.54	1553.62	12471
																7.71	536.787	14999
																8.46	820.83	22861
																8.55	1355.51	329454
																8.55	1356.51	207736
																8.55	1377.49	95402
																8.55	1357.52	92455
																8.55	1378.5	57041
																8.55	1379.5	30530
																8.55	1497.45	13466
																8.55	1439.45	13373
																8.55	1585.51	12352
																8.56	1358.52	38361
																8.56	1591.51	17905
																8.56	1491.44	14242
																8.88	1833.64	14220
																8.89	1216.75	19808
																8.9	1874.59	12734
																8.91	1887.07	7925
																9.03	1599.61	49475
																9.04	1602.63	17346
																9.04	800.823	16284
																9.04	800.307	12246
																9.05	1600.62	49294
																9.05	1621.59	29425
																9.06	1601.63	31380
																9.25	1559.62	18800
																9.6	1317.5	12791
																9.8	1560.59	39650
																9.84	1559.6	44910
																9.85	1558.59	46866
																9.91	1319.51	41822
																9.91	1320.51	26441
																9.91	1341.49	23873
																9.91	1342.5	15719
																9.91	1321.5	11018
																11.11	1339.62	14452
																11.12	1734.01	6368
																11.37	1115.44	11560
																11.79	494.814	8573
																12.08	946.429	19565
																12.08	1115.44	15401
																12.09	946.926	26526
																12.59	1506.64	15577
																12.62	1595.6	12700
																12.67	1799.52	12836
																12.75	494.812	9001
																12.87	1319.53	85898
																12.87	1340.51	32808
																12.88	1318.53	122297
																12.88	1320.53	42499
																12.88	1341.55	26260
																12.88	1321.55	20896
																12.99	702.864	20609
																13.02	1200.77	15955
																13.35	1957.45	11940
																13.6	1438.49	19525
																13.61	1318.53	185473
																13.61	1319.53	116361
																13.61	1320.53	66886
																13.61	1340.51	51875
																13.61	1341.52	37666
																13.61	1321.54	34069
																13.62	1342.54	19635
																13.64	1590.5	15581
																13.98	1865.95	9712
																14.06	906.827	13788
																14.43	494.814	9844
																14.89	1418.53	11469
																14.95	1640.49	16465
																15.55	1999.45	8732
																15.55	1916.41	8464
																15.58	1236.47	48241
																15.59	1237.48	30851
																15.59	1258.47	18863
																15.6	1238.46	12735
																15.61	494.811	8052
																15.72	1819.49	13891
																15.74	1862.46	15461
																15.79	1952.46	14459
																15.86	1215.73	39908
																16.34	1954.45	19530
																16.35	1917.46	12312
																16.51	1236.47	74136
																16.51	1237.47	40751
																16.51	1238.47	18623
																16.52	1259.44	13852
																16.53	1258.44	22365
																16.94	1992.43	12262
																16.95	1737.47	12447
																17	1906.98	7434
																17.33	1194.81	47133
																17.37	1704.5	13319
																17.47	494.814	10869
																17.93	1865.41	18657

## Sheet: ABS+BKF+BTG+GUH
	UPLC peaks												3D MS1
Observed RT (min)	% Amount (%)	Observed Glucose Units	Observed m/z	Database Glucose Units	Theoretical m/z	GlycanAnalyzer assignment	Oxford notation	Notes				Retention time (min)	Observed mass (m/z)	Intensity (Counts)
4.26	92.29	4.2658	1031.404 (+1H)	4.2653	1031.4038 (+1H)							4	1619.72	26539
5.92	0.5	5.1895	1193.4569 (+1H)	5.2582	1193.4566 (+1H)		M4					4	1717.7	18300
6.3	0.84	5.3684	?	?	?	?	?					4.01	1629.63	19547
8.46	6.21	6.2203	1355.5097 (+1H)	6.1595	1355.5094 (+1H)		M5					4.02	1117.76	25345
11.03	0.07	7.0214	1517.6223 (+1H)	7.0093	1517.5622 (+1H)		M6					4.02	1526.7	25174
15.91	0.08	8.6513	1841.6580 (+1H)	8.6669	1841.6678 (+1H)		M8 D2,D3					4.02	1935.64	21085
												4.03	1428.72	34825
												4.03	1433.68	29011
												4.03	1842.62	26460
												4.03	610.851	21676
												4.04	1193.76	23301
												4.05	1444.4	385593
												4.05	1297.36	239012
												4.05	1002.76	47239
												4.06	593.597	34171
												4.06	1215.74	27193
												4.06	1198.71	25684
												4.06	1340.66	23912
												4.06	1957.63	21332
												4.06	688.388	9979
												4.07	1531.65	34119
												4.07	1646.66	17636
												4.07	1936.69	15413
												4.08	1369.38	329658
												4.08	1368.38	275167
												4.08	1438.63	22236
												4.08	527.16	21162
												4.08	1330.75	18937
												4.08	522.203	18343
												4.09	1442.4	199331
												4.09	904.787	51417
												4.09	997.802	25628
												4.1	1443.4	294462
												4.1	674.372	197190
												4.1	675.375	69855
												4.1	1313.72	40966
												4.1	549.507	24530
												4.1	1974.67	12942
												4.11	1371.38	296421
												4.11	1517.42	164716
												4.11	438.844	67609
												4.11	806.804	40242
												4.11	414.895	32245
												4.11	482.808	24290
												4.11	1196.82	21934
												4.12	1370.38	358480
												4.12	708.829	46044
												4.12	416.863	33948
												4.12	1220.7	21851
												4.13	647.458	103545
												4.13	1024.74	54235
												4.13	548.504	47524
												4.13	1318.67	36954
												4.13	1195.82	36933
												4.13	1117.76	25345
												4.13	1144.7	15617
												4.14	1520.42	103009
												4.14	1194.81	72719
												4.14	850.778	53664
												4.14	460.826	51903
												4.14	648.462	35041
												4.14	632.834	31877
												4.14	1242.67	24540
												4.14	1210.78	13865
												4.14	1526.7	13265
												4.14	1216.77	11568
												4.15	436.878	53547
												4.15	926.762	52652
												4.15	948.74	25742
												4.15	1122.72	23284
												4.15	534.857	17378
												4.15	730.809	16255
												4.15	1046.72	14958
												4.15	1100.73	14002
												4.15	1718.73	12756
												4.16	412.115	24609
												4.16	1085.54	10110
												4.18	540.228	12622
												4.19	518.246	204224
												4.19	519.249	53905
												4.23	1740.47	24241
												4.23	686.337	21886
												4.24	918.444	18838
												4.25	1413.27	22033
												4.26	1837.2	45289
												4.26	1761.21	40665
												4.26	1176.35	19450
												4.26	1839.22	17567
												4.26	1163.51	10532
												4.27	1717.25	35208
												4.27	1740.23	31522
												4.27	1815.22	30858
												4.27	1838.19	28517
												4.27	1913.21	23851
												4.27	1936.17	23710
												4.27	1958.16	22527
												4.27	1273.31	22350
												4.28	1641.25	68625
												4.28	1293.3	60058
												4.28	589.319	50124
												4.28	1472.79	17092
												4.28	1930.15	15809
												4.28	1786.73	7820
												4.29	1131.37	46900
												4.29	1642.25	42716
												4.29	1619.27	42137
												4.29	1069.36	39365
												4.29	1935.18	38721
												4.29	1251.34	27248
												4.29	1472.33	25971
												4.29	1641.75	21369
												4.29	1543.76	20992
												4.29	1423.81	19738
												4.29	1567.24	17351
												4.29	1630.75	17210
												4.29	590.323	17049
												4.29	1931.25	15638
												4.29	1832.24	14878
												4.29	1630.25	14820
												4.29	1688.75	13523
												4.3	1325.34	154281
												4.3	870.354	89510
												4.3	1249.34	74439
												4.3	1228.36	68230
												4.3	1739.23	56853
												4.3	1175.35	50335
												4.3	707.3	48727
												4.3	545.246	43493
												4.3	1521.27	40417
												4.3	1742.5	36342
												4.3	1327.34	36305
												4.3	1057.4	35308
												4.3	1014.38	34581
												4.3	871.358	31575
												4.3	1397.33	31164
												4.3	1336.83	30969
												4.3	1434.8	28753
												4.3	1743.47	28416
												4.3	1762.22	26308
												4.3	1643.24	24363
												4.3	1545.27	22733
												4.3	1483.8	22067
												4.3	895.34	21520
												4.3	1484.29	20657
												4.3	1494.78	20275
												4.3	1494.28	20002
												4.3	1179.37	19765
												4.3	1532.29	18894
												4.3	1786.23	18871
												4.3	1690.75	18621
												4.3	1151.86	18024
												4.3	1015.38	17899
												4.3	1173.84	17322
												4.3	1592.76	16744
												4.3	1603.25	15157
												4.3	1895.21	15040
												4.3	1558.6	14968
												4.3	1554.27	14549
												4.3	1882.19	14227
												4.3	1113.86	14070
												4.3	1603.74	13443
												4.3	1950.01	12655
												4.3	1288.83	12281
												4.3	1081.39	11773
												4.3	1592.23	10252
												4.3	1833.26	9485
												4.31	1031.4	30566620
												4.31	1032.41	14661554
												4.31	1033.41	5323110
												4.31	1053.38	2676810
												4.31	1034.41	1449836
												4.31	1054.39	1329378
												4.31	1031.66	942579
												4.31	1055.39	461394
												4.31	690.246	350237
												4.31	1035.41	329597
												4.31	1173.34	267531
												4.31	869.35	213983
												4.31	1129.38	160875
												4.31	1227.36	136523
												4.31	691.249	104882
												4.31	1130.38	98153
												4.31	1151.36	91761
												4.31	1032.66	80550
												4.31	1543.27	69693
												4.31	1036.41	67397
												4.31	1423.31	65641
												4.31	1299.35	54934
												4.31	1467.27	45652
												4.31	1375.36	43690
												4.31	528.213	41787
												4.31	1250.34	40770
												4.31	1396.34	38372
												4.31	1189.35	37611
												4.31	1178.87	36212
												4.31	1031.8	33627
												4.31	1129.88	32276
												4.31	1276.35	31934
												4.31	1287.33	31851
												4.31	1238.35	30679
												4.31	1140.87	30006
												4.31	692.252	29787
												4.31	1287.84	28286
												4.31	1336.32	27817
												4.31	1229.36	27617
												4.31	1547.61	27156
												4.31	1385.81	26935
												4.31	1140.37	25213
												4.31	1664.22	24985
												4.31	1349.31	24062
												4.31	1288.34	23781
												4.31	1227.86	23367
												4.31	1386.3	22293
												4.31	1532.78	22152
												4.31	1396.81	21362
												4.31	1070.36	21132
												4.31	1435.3	21107
												4.31	1076.46	20987
												4.31	1080.4	20320
												4.31	1391.28	20050
												4.31	1347.82	20004
												4.31	1080.9	19874
												4.31	708.302	19854
												4.31	1587.23	19786
												4.31	1374.83	19062
												4.31	1596.11	18357
												4.31	1162.86	18281
												4.31	1581.77	18028
												4.31	1113.35	17202
												4.31	1141.38	16994
												4.31	1495.29	16556
												4.31	1694.08	16419
												4.31	1558.1	15897
												4.31	1407.79	15843
												4.31	1693.58	15592
												4.31	1792.06	15423
												4.31	1679.25	15398
												4.31	1037.42	14843
												4.31	1548.63	14635
												4.31	1091.88	14542
												4.31	1803.52	14489
												4.31	1091.38	14375
												4.31	1743.05	14359
												4.31	1803.05	13874
												4.31	1802.5	13170
												4.31	1705.05	13076
												4.31	1851.51	12915
												4.31	1628.32	12601
												4.31	1705.59	12582
												4.31	1701.74	12363
												4.31	1852.97	12046
												4.31	1702.23	11690
												4.31	1704.48	11665
												4.31	1211.34	11653
												4.31	1896.23	10122
												4.31	1596.63	10003
												4.31	1130.88	9980
												4.31	1570.77	9956
												4.31	1092.38	8420
												4.32	1174.35	128604
												4.32	1056.39	122799
												4.32	1347.32	86410
												4.32	1326.34	81437
												4.32	1374.36	67641
												4.32	1271.32	52958
												4.32	1152.36	52711
												4.32	1348.32	47556
												4.32	1522.4	47385
												4.32	1424.32	42650
												4.32	1859.18	34645
												4.32	1742.5	34581
												4.32	1547.1	31839
												4.32	1385.32	30270
												4.32	1238.85	29902
												4.32	1468.27	29264
												4.32	1566.27	28801
												4.32	1178.37	28518
												4.32	1483.27	27954
												4.32	1189.86	27537
												4.32	1276.84	27222
												4.32	1434.3	25399
												4.32	1190.36	25126
												4.32	1860.18	25107
												4.32	1277.35	24190
												4.32	1153.36	23395
												4.32	1546.6	22653
												4.32	1685.2	22186
												4.32	1325.83	22159
												4.32	1473.32	21087
												4.32	1533.28	21057
												4.32	1358.33	20975
												4.32	1337.33	20832
												4.32	1298.83	20431
												4.32	1445.8	20298
												4.32	1249.84	20207
												4.32	1239.35	19923
												4.32	1582.28	19339
												4.32	1690.24	18722
												4.32	1741.21	18559
												4.32	1200.85	18361
												4.32	1548.11	17508
												4.32	1200.35	17420
												4.32	1309.31	15906
												4.32	1645.09	15835
												4.32	1645.57	15002
												4.32	1644.58	14867
												4.32	1754.04	14787
												4.32	1557.59	14740
												4.32	1694.56	14548
												4.32	1852.48	14511
												4.32	1162.35	14350
												4.32	1359.33	14190
												4.32	1852.03	14157
												4.32	1228.87	13366
												4.32	1900.98	13341
												4.32	1201.34	12949
												4.32	1607.59	12788
												4.32	1813.99	12463
												4.32	1593.76	12031
												4.32	1998.98	11787
												4.32	1260.33	11707
												4.32	1890.02	11616
												4.32	1239.85	11594
												4.32	1570.29	11509
												4.32	1998.47	11480
												4.32	1607.05	11412
												4.32	1597.1	11248
												4.32	1310.32	11244
												4.32	1568.58	10936
												4.32	1559.12	10791
												4.32	1141.88	10783
												4.32	1163.34	10605
												4.32	1179.88	10542
												4.32	1569.09	10229
												4.33	1565.25	47612
												4.33	1663.23	43482
												4.33	1544.26	42646
												4.33	1957.15	34976
												4.33	1272.32	27418
												4.33	1620.28	26458
												4.33	1581.29	26158
												4.33	1505.32	21577
												4.33	1013.39	21323
												4.33	1045.39	19158
												4.33	1104.5	18423
												4.33	1814.51	18164
												4.33	1505.79	16469
												4.33	1999.49	16338
												4.33	1407.3	15426
												4.33	1792.55	15289
												4.33	1282.33	15151
												4.33	1950.48	14592
												4.33	1652.24	13933
												4.33	1656.55	13890
												4.33	1456.31	13811
												4.33	1038.48	13433
												4.33	1835.25	12978
												4.33	1889.5	12263
												4.33	1912.03	12033
												4.33	1278.34	12024
												4.33	1309.83	11189
												4.33	1691.76	9604
												4.34	1030.39	39483
												4.34	1029.39	34577
												4.34	1718.26	25253
												4.34	1953.21	15908
												4.34	1631.29	14726
												4.34	519.746	10247
												4.35	1742.5	35687
												4.35	1816.23	18174
												4.36	1523.4	25711
												4.36	1425.33	15756
												4.36	1402.39	14899
												4.36	1403.38	13056
												4.36	1426.35	9747
												4.37	1379.41	35498
												4.37	1381.41	27950
												4.37	1380.42	25592
												4.37	1401.39	18875
												4.37	1382.41	14751
												4.37	1477.38	13957
												4.37	1404.38	10595
												4.37	1793.3	10082
												4.37	1383.41	9705
												4.37	1479.4	8797
												4.38	1478.4	8509
												4.39	1597.43	19242
												4.39	723.178	7193
												4.4	468.978	16653
												4.4	446.996	9927
												4.41	512.94	11041
												4.41	588.935	11035
												4.41	490.959	10618
												4.41	664.93	8288
												4.45	704.328	17759
												4.47	647.458	115424
												4.47	828.787	34170
												4.47	438.844	29500
												4.47	872.756	21559
												4.47	436.878	21032
												4.47	1314.74	18298
												4.47	926.766	16509
												4.47	1118.78	16162
												4.48	970.725	21841
												4.48	1318.68	16217
												4.48	948.74	15050
												4.48	1438.62	9379
												4.49	1444.4	181648
												4.49	1042.8	76104
												4.49	490.215	25500
												4.49	1144.7	20008
												4.49	1554.66	9994
												4.49	1282.71	9086
												4.5	922.833	25980
												4.5	549.506	23102
												4.51	648.461	65727
												4.51	460.826	37627
												4.51	413.265	37305
												4.51	966.797	36615
												4.51	1434.7	23665
												4.51	1242.68	17360
												4.51	502.829	16478
												4.52	1370.38	212900
												4.52	414.245	42509
												4.52	1064.78	32738
												4.53	1162.75	17131
												4.54	752.792	26739
												4.55	1195.82	52138
												4.56	482.809	33871
												4.56	1043.4	20516
												4.56	1044.41	12695
												4.59	1194.81	165598
												4.59	770.852	37091
												4.59	1340.66	14956
												4.6	1140.77	45578
												4.6	1060.39	13814
												4.61	846.841	40445
												4.61	1166.68	21247
												4.63	1372.38	126130
												4.65	966.797	36615
												4.7	401.061	13760
												4.78	499.059	14675
												4.82	990.375	20303
												4.83	991.379	10179
												4.88	842.915	30904
												4.89	832.241	25835
												4.93	1162.76	21527
												4.95	1592.44	83897
												4.97	502.345	62830
												4.98	1295.36	129778
												4.99	1296.36	67739
												5	1294.36	89212
												5.01	1374.38	59357
												5.03	548.985	31475
												5.04	429.025	47268
												5.04	748.864	45079
												5.04	940.891	44582
												5.04	1448.39	40203
												5.04	1042.8	38686
												5.04	850.778	32639
												5.04	1158.82	31827
												5.04	846.839	30307
												5.04	566.889	29734
												5.04	1470.41	26518
												5.04	1550.72	25666
												5.04	407.043	23822
												5.04	1282.71	21355
												5.04	988.774	20439
												5.04	530.928	18713
												5.04	1452.77	17657
												5.04	646.961	16990
												5.04	906.829	16787
												5.04	1790.68	15665
												5.04	1358.71	13673
												5.04	864.896	12886
												5.04	1238.75	12497
												5.04	1616.7	10761
												5.04	1140.77	10649
												5.05	1520.41	114254
												5.05	413.266	86001
												5.05	454.934	83966
												5.05	842.913	49267
												5.05	650.886	45739
												5.05	552.911	40746
												5.05	1256.81	36528
												5.05	498.9	34429
												5.05	1136.84	33775
												5.05	962.874	31914
												5.05	1278.79	29830
												5.05	1038.87	29589
												5.05	1060.85	27547
												5.05	1162.76	26180
												5.05	430.914	23655
												5.05	1184.73	21143
												5.05	1768.7	18547
												5.05	944.816	17873
												5.05	966.797	17166
												5.05	1354.78	12487
												5.05	1086.76	12112
												5.05	1314.74	11722
												5.05	1960.66	11109
												5.05	1786.73	10878
												5.05	1234.82	10644
												5.06	1369.38	263350
												5.06	1445.4	235748
												5.06	770.849	75859
												5.06	476.916	61128
												5.06	1196.82	45386
												5.06	1064.78	45021
												5.06	1474.73	34912
												5.06	744.937	31155
												5.06	536.891	26358
												5.06	502.826	25032
												5.06	868.823	20705
												5.06	1572.71	19870
												5.06	702.867	19090
												5.06	1332.79	17239
												5.06	1260.72	17149
												5.06	574.892	16826
												5.06	672.868	16110
												5.06	1866.64	15930
												5.06	548.257	14755
												5.06	974.812	14185
												5.06	1380.69	11075
												5.07	1442.4	141107
												5.07	1195.82	76589
												5.07	852.777	23446
												5.07	1397.38	16999
												5.07	1246.76	15319
												5.07	549.509	12800
												5.08	733.368	11501
												5.09	1517.42	68050
												5.09	1396.39	13378
												5.1	1375.38	17837
												5.13	490.214	18801
												5.14	1174.56	10066
												5.15	1018.94	13874
												5.15	1363.93	11674
												5.15	1823.91	8898
												5.16	575.983	22498
												5.16	1689.93	18049
												5.16	1478.92	17406
												5.16	482.965	11372
												5.16	1270.91	7158
												5.17	1669.44	34338
												5.17	597.959	19470
												5.17	827.951	18290
												5.17	1276.93	17644
												5.17	712.953	16089
												5.17	1960.89	12132
												5.17	1323.45	9263
												5.17	1614.93	7659
												5.17	1670.92	7290
												5.18	942.942	97317
												5.18	1035.96	71360
												5.18	1150.96	71090
												5.18	920.967	55373
												5.18	1172.93	45203
												5.18	476.272	40319
												5.18	805.976	38537
												5.18	1842.91	38108
												5.18	1152.95	37942
												5.18	1496.94	26646
												5.18	1966.91	21903
												5.18	1036.96	21476
												5.18	1593.92	20929
												5.18	1967.91	17844
												5.18	1507.93	17086
												5.18	1918.92	16616
												5.18	1343.95	12483
												5.18	1708.92	11933
												5.18	1844.91	11343
												5.18	1730.89	11241
												5.18	1729.9	11041
												5.18	1519.91	10599
												5.18	1965.93	9589
												5.18	1979.88	8946
												5.18	1841.92	8387
												5.18	1059.93	5810
												5.19	822.992	138545
												5.19	593.005	101157
												5.19	478.01	60884
												5.19	709.996	51998
												5.19	1057.94	49095
												5.19	1610.93	44926
												5.19	1399.96	42326
												5.19	944.938	40882
												5.19	1287.92	40419
												5.19	1840.92	39900
												5.19	1612.93	37058
												5.19	1857.93	35003
												5.19	1957.92	33136
												5.19	1382.94	32114
												5.19	1859.93	31914
												5.19	1283.97	25688
												5.19	1726.93	25566
												5.19	1266.95	24624
												5.19	1289.93	24363
												5.19	690.979	24256
												5.19	922.965	23846
												5.19	595.002	23455
												5.19	1506.93	23339
												5.19	708.999	22564
												5.19	1803.92	22034
												5.19	941.978	21791
												5.19	1862.91	21385
												5.19	1743.93	21347
												5.19	1174.93	20697
												5.19	1749.9	20513
												5.19	1802.95	20323
												5.19	1917.94	20303
												5.19	1457.95	19920
												5.19	1447.95	19807
												5.19	1907.93	19331
												5.19	1160.46	19151
												5.19	1919.93	18275
												5.19	1274.46	17703
												5.19	1678.93	17490
												5.19	1516.94	17126
												5.19	1208.46	16983
												5.19	1572.95	16748
												5.19	1286.96	16656
												5.19	1899.41	16299
												5.19	1332.95	16130
												5.19	880.49	16006
												5.19	1975.93	16002
												5.19	1456.46	15618
												5.19	1630.94	15487
												5.19	1793.94	15288
												5.19	1056.97	15143
												5.19	1795.42	15042
												5.19	1973.94	15039
												5.19	1965.43	14508
												5.19	1561.95	14449
												5.19	1908.93	14301
												5.19	1958.92	14114
												5.19	871.978	14026
												5.19	940.982	13960
												5.19	1225.47	13789
												5.19	1391.93	13788
												5.19	1209.46	13690
												5.19	1676.93	13680
												5.19	1737.43	12812
												5.19	1571.46	12783
												5.19	930.472	12435
												5.19	1687.44	12032
												5.19	1389.45	11970
												5.19	1572.45	11562
												5.19	1917.46	11011
												5.19	1112.47	10407
												5.19	1685.43	10198
												5.19	1906.93	10179
												5.19	1556.93	9062
												5.19	1573.45	9015
												5.19	1458.44	8995
												5.19	1438.45	6060
												5.2	937.985	220622
												5.2	707.998	161927
												5.2	1052.98	137408
												5.2	1167.97	105439
												5.2	939.984	94340
												5.2	1282.97	72538
												5.2	1397.96	65625
												5.2	1054.98	64908
												5.2	1169.97	62833
												5.2	1265.95	58446
												5.2	1495.94	51763
												5.2	1380.94	51641
												5.2	1512.96	49105
												5.2	824.989	47424
												5.2	1627.95	44598
												5.2	1514.95	43586
												5.2	1284.96	42288
												5.2	1725.93	42242
												5.2	766.517	40354
												5.2	938.985	40208
												5.2	1742.94	39925
												5.2	1497.94	37630
												5.2	1402.92	36399
												5.2	1727.93	33458
												5.2	1037.96	32413
												5.2	1053.98	31773
												5.2	1517.92	31699
												5.2	1629.95	30507
												5.2	1632.92	30278
												5.2	1747.91	30036
												5.2	1168.97	27413
												5.2	1744.93	26126
												5.2	1151.96	25196
												5.2	1737.91	24440
												5.2	1843.92	23937
												5.2	1398.96	23001
												5.2	1974.93	22558
												5.2	1513.95	22114
												5.2	823.991	21390
												5.2	1450.42	21010
												5.2	1852.9	20808
												5.2	1159.47	20359
												5.2	1956.92	20163
												5.2	1275.46	19829
												5.2	1324.44	19229
												5.2	1860.93	19141
												5.2	1401.95	18876
												5.2	1171.96	18566
												5.2	1446.95	17907
												5.2	1506.43	17594
												5.2	1613.94	17524
												5.2	1677.94	17298
												5.2	1628.94	17262
												5.2	1861.92	17142
												5.2	986.975	17087
												5.2	1111.48	16670
												5.2	1439.44	16548
												5.2	1390.45	16394
												5.2	1792.93	16363
												5.2	1863.9	16286
												5.2	765.495	16176
												5.2	1045.47	16151
												5.2	1735.44	16131
												5.2	1916.39	16112
												5.2	1216.96	16108
												5.2	996.482	16054
												5.2	929.475	15938
												5.2	1515.95	15855
												5.2	1219.44	15822
												5.2	1110.47	15720
												5.2	1746.94	15714
												5.2	1101.97	15685
												5.2	1784.41	15326
												5.2	1226.47	15226
												5.2	1631.93	15211
												5.2	1686.45	15099
												5.2	1331.95	14904
												5.2	987.971	14879
												5.2	1562.94	14829
												5.2	1573.95	14683
												5.2	1342.95	14667
												5.2	1553.44	14600
												5.2	1745.94	14464
												5.2	1400.96	13905
												5.2	1455.44	13824
												5.2	1341.46	13821
												5.2	1785.42	13743
												5.2	1563.94	13688
												5.2	1736.44	13580
												5.2	1861.43	13471
												5.2	1565.42	13443
												5.2	1746.44	12701
												5.2	1170.97	12493
												5.2	1924.94	12144
												5.2	1340.46	12032
												5.2	1448.94	11964
												5.2	1802.44	11948
												5.2	1333.95	11894
												5.2	1794.43	11765
												5.2	882.974	11594
												5.2	1276.46	11589
												5.2	1457.45	11376
												5.2	1909.9	11350
												5.2	1515.45	10979
												5.2	1860.39	10935
												5.2	1286.44	10820
												5.2	1851.43	10710
												5.2	1391.45	10604
												5.2	1630.43	10441
												5.2	1342.46	10304
												5.2	1570.43	10261
												5.2	997.474	9782
												5.2	1623.92	9730
												5.2	1918.41	9561
												5.2	825.47	8905
												5.2	1227.46	8661
												5.2	1631.43	8108
												5.2	1384.42	7946
												5.2	1228.46	6925
												5.21	1955.93	34626
												5.21	1972.94	28758
												5.21	1804.93	26894
												5.21	1112.96	21586
												5.21	1217.96	20900
												5.21	1622.92	20480
												5.21	1858.93	19614
												5.21	1620.44	19593
												5.21	1505.44	19196
												5.21	1504.42	18838
												5.21	1044.47	18065
												5.21	1102.96	17958
												5.21	1621.92	16865
												5.21	1853.92	16863
												5.21	1976.92	16472
												5.21	1554.44	16403
												5.21	1687.95	16379
												5.21	995.479	15599
												5.21	1801.43	15549
												5.21	650.501	15130
												5.21	1748.91	15030
												5.21	1794.93	14948
												5.21	1619.45	14180
												5.21	1745.43	14114
												5.21	1734.44	14107
												5.21	1440.44	13933
												5.21	1621.43	13419
												5.21	1975.51	13380
												5.21	1688.92	13011
												5.21	1736.92	12996
												5.21	881.486	12893
												5.21	814.48	12775
												5.21	1055.46	12578
												5.21	1553.95	12575
												5.21	1679.43	12505
												5.21	1498.91	12317
												5.21	1055.97	11809
												5.21	1170.46	11807
												5.21	1458.95	11432
												5.21	998.961	11429
												5.21	1564.95	10990
												5.21	1056.45	10089
												5.21	1218.95	9596
												5.21	1783.93	9391
												5.21	1851.91	9001
												5.21	1681.41	8086
												5.21	1805.92	8085
												5.21	882.484	6550
												5.21	1679.92	6450
												5.22	1611.93	25594
												5.22	1976.32	19808
												5.22	1850.41	16549
												5.22	1335.43	15623
												5.22	1978.9	14177
												5.22	1093.46	13846
												5.22	1564.42	13140
												5.22	1622.43	12964
												5.22	1113.95	11814
												5.22	1612.42	11696
												5.22	1977.9	10927
												5.22	1441.43	10896
												5.22	1508.92	10877
												5.22	1383.43	5453
												5.23	1381.95	23383
												5.23	1680.41	21717
												5.24	1401.44	12813
												5.24	1786.9	9515
												5.24	1334.44	9454
												5.25	1404.92	16303
												5.25	1728.92	14723
												5.25	1613.42	12863
												5.25	1557.92	11420
												5.25	1959.91	10388
												5.25	997.965	9923
												5.25	1392.92	8322
												5.27	1785.91	22489
												5.27	1728.43	22437
												5.27	1902.91	19909
												5.27	1614.42	14977
												5.27	1499.42	10629
												5.28	1385.91	27522
												5.28	1919.93	17295
												5.28	1614.91	12653
												5.29	1035.96	70858
												5.29	1267.95	29787
												5.29	1708.92	26192
												5.29	1938.91	19683
												5.29	1940.91	18998
												5.29	1634.91	16577
												5.29	1662.42	12368
												5.29	1604.93	8057
												5.29	1903.9	7371
												5.3	1823.91	23584
												5.3	1825.91	23426
												5.3	1059.93	20245
												5.3	1664.44	16852
												5.3	1663.4	11544
												5.3	1997.91	11502
												5.31	1172.93	45729
												5.31	1806.9	19868
												5.31	1732.88	19690
												5.31	1922.91	18384
												5.31	1250.93	16858
												5.31	1480.92	16698
												5.31	1731.9	13279
												5.32	1150.96	43833
												5.32	1845.89	26151
												5.32	1615.9	23436
												5.32	1691.91	18393
												5.32	1616.9	18230
												5.32	1653.92	11984
												5.32	1830.84	10273
												5.32	1942.9	9346
												5.33	1289.93	24363
												5.33	1730.89	23965
												5.33	1713.88	19535
												5.33	1387.9	18669
												5.33	1594.92	17551
												5.33	1921.9	16839
												5.33	1546.44	16778
												5.33	1479.93	15666
												5.33	1827.88	14843
												5.33	1272.91	14803
												5.33	1538.87	13921
												5.33	1949.86	12897
												5.33	1710.9	11800
												5.33	1547.42	11449
												5.33	1597.89	10989
												5.33	1537.42	10357
												5.34	1371.38	131475
												5.34	827.95	62729
												5.34	1592.43	58157
												5.34	1057.94	49095
												5.34	1287.92	34446
												5.34	1711.92	16081
												5.34	1473.41	15372
												5.34	1471.42	14763
												5.34	1712.91	14016
												5.34	1364.95	13096
												5.35	1369.38	124598
												5.35	1444.4	118477
												5.35	805.976	38917
												5.35	1037.96	32413
												5.35	1593.91	26686
												5.35	1500.9	23766
												5.35	829.944	18661
												5.35	1483.87	17219
												5.35	1478.92	16786
												5.35	1617.88	16752
												5.35	1943.91	16422
												5.35	1894.88	14989
												5.35	1135.93	14668
												5.35	1893.87	14482
												5.35	1941.9	13697
												5.36	942.942	96983
												5.36	1593.43	65821
												5.36	920.967	54718
												5.36	944.938	40984
												5.36	1270.91	28970
												5.36	1248.93	27874
												5.36	1155.91	27773
												5.36	1133.93	26897
												5.36	1018.94	25200
												5.36	1363.94	23627
												5.36	1828.88	21290
												5.36	1598.88	20069
												5.36	1791.86	19026
												5.36	714.95	17906
												5.36	1960.88	17516
												5.36	1576.92	17248
												5.36	478.009	16189
												5.36	1768.91	16183
												5.36	1923.89	15307
												5.36	1577.92	15054
												5.36	1693.89	15004
												5.36	1714.86	14685
												5.36	1944.9	14200
												5.36	1904.9	13718
												5.36	1600.87	12766
												5.36	1502.89	9641
												5.37	712.954	55126
												5.37	1373.38	45054
												5.37	1174.93	27203
												5.37	1385.91	26462
												5.37	1808.91	17913
												5.37	1807.9	16018
												5.37	1692.91	15132
												5.37	1231.91	14954
												5.37	1578.91	14261
												5.37	1931.85	14142
												5.37	1946.88	13285
												5.37	1249.94	10471
												5.38	1522.41	35406
												5.38	482.965	29880
												5.38	1665.43	27885
												5.38	1523.41	24538
												5.38	1221.35	22794
												5.38	1253.89	19904
												5.38	925.924	18985
												5.38	1138.9	16580
												5.38	690.98	15801
												5.38	1961.9	15161
												5.38	1370.88	12994
												5.38	1927.9	11705
												5.39	1516.42	110660
												5.39	597.96	31451
												5.39	947.897	30306
												5.39	832.9	22200
												5.39	1368.89	18916
												5.39	1040.92	18545
												5.39	1597.41	18324
												5.39	1926.87	15462
												5.39	1157.91	14174
												5.39	1875.88	14163
												5.39	1911.75	13499
												5.39	1560.91	13318
												5.4	1519.42	125817
												5.4	810.927	18940
												5.4	1675.88	16584
												5.4	1696.86	16253
												5.4	949.895	15331
												5.4	1773.88	14991
												5.4	1116.92	14656
												5.4	1466.88	14167
												5.4	599.27	12090
												5.4	1813.86	10085
												5.41	1446.4	155151
												5.41	1590.43	37900
												5.41	717.91	20439
												5.41	602.916	15359
												5.41	1023.9	15198
												5.41	1697.86	13876
												5.41	1351.87	13555
												5.42	695.934	19178
												5.42	580.94	17471
												5.42	952.849	15858
												5.43	593.597	45997
												5.43	1595.43	37977
												5.43	1429.37	12671
												5.43	1660.87	8170
												5.44	1444.4	140494
												5.44	1521.41	49863
												5.45	1370.38	166993
												5.45	566.569	28732
												5.46	565.566	120656
												5.47	548.503	56992
												5.47	537.535	40842
												5.47	549.506	21249
												5.48	680.479	27103
												5.48	502.788	12659
												5.49	474.256	35880
												5.5	524.771	18957
												5.51	404.833	36130
												5.52	1369.38	131406
												5.52	1195.82	69245
												5.52	574.871	16217
												5.52	1037.44	14623
												5.53	1196.82	87933
												5.53	648.461	61330
												5.53	575.514	25653
												5.54	647.458	185896
												5.56	702.864	26538
												5.57	770.844	39468
												5.58	1060.83	28783
												5.59	1158.81	18488
												5.6	744.929	36640
												5.6	1256.79	11949
												5.61	448.913	25253
												5.61	1376.74	24069
												5.61	962.857	17412
												5.62	476.904	46722
												5.62	850.779	42892
												5.62	498.896	35100
												5.62	689.212	25375
												5.62	1082.82	13109
												5.63	1194.81	168641
												5.63	548.979	26123
												5.64	454.918	68637
												5.64	1195.82	59992
												5.64	413.264	56455
												5.64	940.876	27177
												5.64	1372.8	19215
												5.64	1572.72	11311
												5.65	842.902	31218
												5.65	548.503	31154
												5.65	890.788	26017
												5.66	694.835	24497
												5.66	846.829	21633
												5.66	1042.79	21032
												5.67	552.901	41740
												5.67	864.887	31155
												5.67	868.802	13239
												5.68	574.879	22495
												5.68	716.789	17336
												5.68	748.845	15833
												5.68	458.845	15647
												5.68	480.829	11143
												5.69	432.936	29937
												5.69	650.864	27732
												5.69	530.914	21279
												5.69	672.844	16552
												5.69	436.865	16387
												5.69	414.884	14485
												5.7	646.938	36287
												5.7	744.914	25665
												5.7	410.957	24998
												5.7	508.932	11124
												5.7	628.882	10943
												5.71	429.012	26197
												5.71	722.933	11747
												5.72	526.977	20712
												5.74	407.032	25788
												5.74	524.973	16143
												5.77	1587.77	14393
												5.78	995.38	15673
												5.79	1469.8	16155
												5.79	1768.78	15885
												5.79	1651.81	14039
												5.79	1356.82	11714
												5.81	1667.46	27153
												5.81	1865.75	17241
												5.83	1299.36	21642
												5.83	1670.44	20214
												5.84	684.245	48492
												5.88	524.975	19898
												5.9	932.474	19298
												5.91	792.802	42029
												5.91	931.474	37273
												5.91	466.24	30938
												5.92	886.846	34983
												5.93	526.984	24251
												5.94	722.935	20492
												5.94	1299.81	9394
												5.95	647.458	79783
												5.95	530.913	41155
												5.97	432.939	128032
												5.98	454.92	52439
												5.98	646.943	38750
												5.98	1195.46	34204
												5.98	556.814	22092
												5.99	1193.46	143640
												5.99	1194.46	83748
												5.99	744.923	43395
												6	650.868	59487
												6	842.9	35973
												6	1215.44	22290
												6	548.967	17312
												6	1216.44	14030
												6.01	792.802	36871
												6.02	436.867	24710
												6.03	410.956	41333
												6.04	552.896	75421
												6.04	414.884	16877
												6.07	672.853	43156
												6.08	476.906	43679
												6.08	596.861	37367
												6.09	548.504	34817
												6.1	962.858	28094
												6.12	694.84	22040
												6.14	574.88	77274
												6.17	1195.82	91341
												6.18	966.404	21854
												6.23	498.896	39005
												6.28	684.205	46975
												6.28	689.21	26141
												6.36	1194.46	155087
												6.36	501.266	45215
												6.37	1193.46	274102
												6.37	1215.44	66468
												6.37	1195.46	61625
												6.37	1216.44	36799
												6.37	1196.46	22446
												6.37	1335.4	15284
												6.38	680.253	18717
												6.38	1217.44	17274
												6.44	734.321	23742
												6.47	530.293	36450
												6.47	933.449	20385
												6.53	462.962	58074
												6.53	504.193	18054
												6.61	516.766	63693
												6.61	517.267	36645
												6.62	1032.52	141807
												6.63	1033.52	73316
												6.64	1034.52	27253
												6.64	770.332	16744
												6.68	1682.71	7181
												6.7	911.334	33706
												6.7	933.317	28516
												6.7	928.359	19452
												6.7	912.347	12893
												6.7	934.319	12819
												6.87	1152.47	29511
												6.87	1153.47	17548
												6.98	937.337	19546
												6.99	913.35	131711
												6.99	914.352	53814
												6.99	690.245	17798
												7	935.331	130454
												7	936.336	54479
												7	1055.29	31859
												7	915.353	20847
												7	930.376	19614
												7.01	1056.29	19921
												7.02	813.838	19477
												7.13	911.332	16462
												7.14	933.315	18552
												7.21	646.958	26760
												7.23	565.566	68860
												7.23	476.914	66617
												7.25	1194.81	111197
												7.25	454.93	47811
												7.26	498.899	89058
												7.26	548.983	74376
												7.26	429.023	39036
												7.26	575.513	34562
												7.26	1222.83	34053
												7.26	684.907	25093
												7.26	880.858	24901
												7.26	902.827	24282
												7.27	1195.82	89274
												7.27	648.461	82965
												7.27	647.457	72891
												7.27	451.006	65846
												7.27	570.964	26289
												7.27	1221.82	23903
												7.27	858.878	17893
												7.28	413.265	136314
												7.28	492.882	35074
												7.28	1196.82	26860
												7.28	586.935	16100
												7.29	470.898	37399
												7.29	564.948	36860
												7.29	662.924	27741
												7.29	590.858	25290
												7.29	546.891	21339
												7.29	760.9	16746
												7.31	444.99	37682
												7.31	448.915	25794
												7.31	426.935	24794
												7.31	542.968	16333
												7.31	798.852	15978
												7.4	1983.43	7306
												7.42	1268.66	17945
												7.43	681.842	29464
												7.43	1668.45	21526
												7.44	681.343	34082
												7.44	675.338	25729
												7.44	1776.46	8222
												7.45	674.334	89815
												7.45	404.932	43679
												7.47	399.918	61722
												7.58	409.019	25564
												7.59	488.235	40619
												7.68	537.287	37714
												7.69	536.786	73162
												7.76	630.819	28811
												7.76	631.325	15001
												7.79	1022.42	13279
												7.8	1021.42	28963
												7.94	1355.51	29405
												7.95	1356.51	22038
												7.97	603.299	24552
												8.18	1995.02	6684
												8.35	647.457	59240
												8.43	704.345	31883
												8.44	630.31	43051
												8.49	1445.4	68659
												8.5	581.285	20323
												8.5	760.219	16882
												8.5	581.788	15812
												8.5	1821.49	15652
												8.51	1590.43	43926
												8.51	1595.43	38471
												8.52	1593.44	39516
												8.52	1596.43	30086
												8.52	1743.41	24676
												8.52	1669.46	20025
												8.52	1552.48	17574
												8.52	1508.46	17485
												8.53	1355.51	1793537
												8.53	1356.51	1114551
												8.53	1357.52	489484
												8.53	1591.44	75591
												8.53	1592.45	63398
												8.53	1491.43	58921
												8.53	1359.52	53669
												8.53	1439.47	52094
												8.53	1492.44	49756
												8.53	1585.49	48681
												8.53	697.232	38840
												8.53	1586.49	35795
												8.53	1611.4	28949
												8.53	1513.44	28878
												8.53	1587.49	28673
												8.53	1705.44	27757
												8.53	1014.35	27562
												8.53	1589.41	27381
												8.53	1493.44	25986
												8.53	1507.45	24489
												8.53	1441.48	22064
												8.53	1475.46	21062
												8.53	1360.52	19823
												8.53	1514.43	19624
												8.53	1721.41	18783
												8.53	1612.39	17925
												8.53	1831.42	17182
												8.53	1727.4	16815
												8.53	1455.47	16392
												8.53	1728.44	15355
												8.53	1803.44	14356
												8.53	1814.46	11679
												8.53	1959.38	11028
												8.54	1377.49	358741
												8.54	1378.5	223281
												8.54	1358.52	164944
												8.54	1379.5	98554
												8.54	1380.5	42983
												8.54	1497.45	41413
												8.54	1440.46	37951
												8.54	1607.45	30003
												8.54	1498.45	28543
												8.54	1007.4	27892
												8.54	1594.44	27007
												8.54	697.734	24482
												8.54	1454.48	24077
												8.54	1683.44	23768
												8.54	1522.42	23555
												8.54	1597.41	22677
												8.54	1608.47	20446
												8.54	1381.52	20432
												8.54	1551.5	16548
												8.54	1193.46	16496
												8.54	1008.4	14954
												8.54	1356.02	14091
												8.54	1664.47	10303
												8.55	1453.5	31629
												8.55	1706.44	20244
												8.55	1575.42	12718
												8.58	1521.42	53314
												8.66	862.414	82633
												8.67	863.418	38183
												8.69	647.458	61035
												8.74	608.912	26802
												8.78	681.238	18625
												8.92	1038.42	13054
												8.93	1037.41	26438
												9.14	926.383	18870
												9.17	894.354	13049
												9.41	1446.4	28062
												9.44	854.323	32632
												9.46	853.32	66657
												9.51	1020.39	19987
												9.55	984.383	25041
												9.64	647.458	51593
												9.64	648.462	24565
												9.64	1382.74	10653
												9.68	1972.54	10969
												9.77	1164.33	14884
												9.77	1149.34	10797
												9.78	915.375	30214
												9.78	1055.3	20658
												9.78	1126.37	14585
												9.79	912.366	814227
												9.79	913.369	338162
												9.79	934.348	190401
												9.79	914.372	110778
												9.79	935.352	74507
												9.79	1054.3	38909
												9.79	1032.32	31513
												9.79	1048.29	25342
												9.79	1148.35	24105
												9.8	1130.31	21457
												9.8	1033.32	18200
												9.8	1152.28	15757
												9.8	1142.34	15386
												9.8	1168.23	14880
												9.8	1240.33	11830
												9.81	936.351	28932
												9.89	568.233	19351
												9.93	647.458	39838
												10.16	803.377	19148
												10.18	945.454	32657
												10.29	681.237	20876
												10.3	1314.76	12656
												10.36	702.864	22847
												10.36	1110.79	18108
												10.39	1521.41	32005
												10.48	1152.29	19475
												10.48	1064.29	19145
												10.48	1143.34	12901
												10.49	1054.3	56975
												10.49	1032.32	43310
												10.49	915.372	35146
												10.49	996.315	23011
												10.49	1262.29	19054
												10.49	1268.3	17632
												10.49	1002.33	15093
												10.49	1360.26	10492
												10.5	912.366	1095165
												10.5	913.369	451679
												10.5	934.348	356983
												10.5	914.372	151025
												10.5	935.351	146439
												10.5	936.354	48131
												10.5	1048.29	39494
												10.5	1148.35	36028
												10.5	1595.44	25970
												10.5	1070.3	24489
												10.5	1164.32	21901
												10.5	1142.34	21465
												10.5	1168.24	21322
												10.5	1170.32	21142
												10.5	1130.3	20148
												10.5	1033.32	19582
												10.5	1049.29	19251
												10.5	1149.36	18363
												10.5	1076.29	17979
												10.51	1284.27	21284
												10.51	1174.26	19261
												10.51	475.66	16233
												10.52	1521.41	32005
												10.52	1055.31	31321
												10.52	1246.33	11279
												10.58	904.424	33565
												11.02	1324.58	25409
												11.08	1517.41	24642
												11.12	1517.62	28225
												11.16	1425.6	36943
												11.18	1426.63	40810
												11.51	1332.47	18488
												11.52	1337.42	9287
												11.86	1663.68	11332
												12.06	946.429	37028
												12.06	947.431	12772
												12.08	946.93	36160
												12.15	1074.42	14866
												12.6	905.922	30893
												12.6	1701.61	17516
												12.6	1610.58	13943
												12.64	906.425	25239
												12.65	1679.64	39424
												12.66	1680.61	22227
												12.67	1681.62	14305
												12.82	1442.39	16278
												12.98	1591.46	18495
												13.08	1074.42	25162
												13.82	1074.42	12426
												13.85	1680.65	20525
												14.25	1776.55	14427
												14.5	1883.51	16145
												14.79	1985.53	16395
												15.57	1237.48	128287
												15.57	1238.48	50049
												15.57	1239.48	17561
												15.58	1236.47	238526
												15.58	1258.45	49552
												15.58	1259.46	29198
												15.58	1260.46	12339
												15.8	494.815	15896
												15.81	1518.43	18721
												15.84	1635.47	12401
												15.91	781.869	54242
												15.92	780.872	119082
												15.93	781.374	80429
												15.97	1843.68	17066
												16.02	1841.66	30451
												16.36	630.316	19764
												16.47	1841.7	17226
												16.48	1239.47	23299
												16.49	1260.46	22822
												16.5	1236.47	326432
												16.5	1237.48	174978
												16.5	1238.48	79982
												16.5	1259.46	51611
												16.5	1320.42	13651
												16.51	1258.45	85147
												16.52	1378.4	14830
												16.82	1935.48	13515
												17.98	1741.48	13188

## Sheet: allpeaks_UPLC
												UNDIGESTED UPLC
											UNDIGESTED+ABS UPLC
											UNDIGESTED+ABS+BKF UPLC
											UNDIGESTED+ABS+BKF+BTG UPLC
											UNDIGESTED+ABS+BKF+BTG+GUH UPLC

## Sheet: peak_FA2G2_UPLC_MS1
TIP: Use the zoom function to see the m/z peaks in the mass spectra
												UNDIGESTED UPLC																									UNDIGESTED MS1
											UNDIGESTED+ABS UPLC																									UNDIGESTED+ABS MS1
											UNDIGESTED+ABS+BKF UPLC																									UNDIGESTED+ABS+BKF MS1
											UNDIGESTED+ABS+BKF+BTG UPLC																									UNDIGESTED+ABS+BKF+BTG MS1
											UNDIGESTED+ABS+BKF+BTG+GUH UPLC																									UNDIGESTED+ABS+BKF+BTG+GUH MS1

## Sheet: All_shifts
? : Perhaps due to incomplete digestion
Tip: Use a ruler to follow your peak
